# Supplementary material for: Correlates of the double burden of malnutrition among women: an analysis of cross sectional survey data from sub-Saharan Africa
Source: PubMed Central journal article supplement — BMJ Open. 2019 Jul 3;9(7):e029545. doi: 10.1136/bmjopen-2019-029545 (PMC6615784; doi:10.1136/bmjopen-2019-029545), 2019-07-03
Supplement: bmjopen-2019-029545.draft_revisions.pdf [file bmjopen-2019-029545.draft_revisions.pdf]

# BMJ Open

BMJ Open is committed to open peer review. As part of this commitment we make the peer review history of every article we publish publicly available.

When an article is published we post the peer reviewers' comments and the authors' responses online. We also post the versions of the paper that were used during peer review. These are the versions that the peer review comments apply to.

The versions of the paper that follow are the versions that were submitted during the peer review process. They are not the versions of record or the final published versions. They should not be cited or distributed as the published version of this manuscript.

BMJ Open is an open access journal and the full, final, typeset and author-corrected version of record of the manuscript is available on our site with no access controls, subscription charges or pay-per-view fees (<http://bmjopen.bmj.com>).

If you have any questions on BMJ Open's open peer review process please email [info.bmjopen@bmj.com](mailto:info.bmjopen@bmj.com)

# BMJ Open

## Double burden of malnutrition among women in sub-Saharan Africa: A cross-country Analysis

|                               |                                                                                                                                                                                                                                                       |
|-------------------------------|-------------------------------------------------------------------------------------------------------------------------------------------------------------------------------------------------------------------------------------------------------|
| Journal:                      | <i>BMJ Open</i>                                                                                                                                                                                                                                       |
| Manuscript ID                 | bmjopen-2019-029545                                                                                                                                                                                                                                   |
| Article Type:                 | Research                                                                                                                                                                                                                                              |
| Date Submitted by the Author: | 30-Jan-2019                                                                                                                                                                                                                                           |
| Complete List of Authors:     | Amugsi, Dickson; African Population and Health Research Center, Urbanization and Wellbeing<br>DIMBUENE, ZACHARIE; University of Kinshasa, Population Sciences and Development<br>Kyobutungi, Catherine; African Population and Health Research Center |
| Keywords:                     | EPIDEMIOLOGY, Nutrition < TROPICAL MEDICINE, PUBLIC HEALTH                                                                                                                                                                                            |
|                               |                                                                                                                                                                                                                                                       |

SCHOLARONE™  
Manuscripts

## Double burden of malnutrition among women in sub-Saharan Africa: A cross-country Analysis

Dickson A. Amugsi<sup>1\*</sup>

[damugsi2002@yahoo.com](mailto:damugsi2002@yahoo.com); [damugsi@aphrc.org](mailto:damugsi@aphrc.org)

Zacharie T. Dimbuene<sup>2,3</sup>

[zacharie.tsala.dimbuene@gmail.com](mailto:zacharie.tsala.dimbuene@gmail.com)

Catherine Kyobutungi<sup>1</sup>

[ckyobutungi@aphrc.org](mailto:ckyobutungi@aphrc.org)

1. African Population and Health Research Center, APHRC Campus, P.O Box 10787-00100, Nairobi, Kenya

2. Department of Population Sciences and Development, University of Kinshasa, Democratic Republic of the Congo

3. Statistics Canada, Social Analysis and Modeling Division, Ottawa, Canada K1A 0T6

\* Corresponding author: Dr Dickson A. Amugsi

Email: [damugsi2002@yahoo.com](mailto:damugsi2002@yahoo.com); [damugsi@aphrc.org](mailto:damugsi@aphrc.org)

Word count: 3725

## Abstract

**Objective:** To investigate the correlates of the double burden of malnutrition (DBM) among women in five sub-Saharan African countries

**Design:** Secondary analysis of Demographic and Health Surveys (DHS). The outcome variable was body mass index (BMI), a measure of DBM. The BMI was classified into underweight (BMI<18.50 kg/m<sup>2</sup>), normal weight (18.50-24.99 kg/m<sup>2</sup>), overweight (25.0-29.9 kg/m<sup>2</sup>) and obese ( $\geq$  30.0 kg/m<sup>2</sup>).

**Settings:** Ghana, Nigeria, Kenya, Mozambique and Democratic Republic of Congo (DRC).

**Subjects:** Women aged 15-49 years (*n* 64,698).

**Results:** Compared with normal weight women, number of years of formal education was associated with the likelihood of being overweight and obese in Ghana, Mozambique and Nigeria, while associated with the likelihood of being underweight in Kenya and Nigeria. Older age was associated with the likelihood of being underweight, overweight and obese in all countries. Positive associations were also observed between living in better-off households, and overweight and obesity, while a negative association was observed for underweight. Breastfeeding was associated with less likelihood of underweight in DRC and Nigeria, obesity in DRC and Ghana, overweight in Kenya, and overweight and obesity in Mozambique and Nigeria relative to normal weight.

**Conclusions:** Our analysis reveals that in all the countries, women who are breastfeeding are less likely to be underweight, overweight and obese. Education, age and household wealth index tend to associate with a higher likelihood of DBM among women. Interventions to address DBM should take into account the variations in the effects of these correlates.

**Keyword:** Double burden, malnutrition, women, correlates, sub-Saharan Africa

### Strengths and limitations of this study

- Large nationally representative samples used, thereby providing more robust estimates of observed associations
- The height and weight data used to compute the BMI were objectively measured, reducing possible misclassification
- Use of multi-country data helped unmask differences and commonalities in the effects of the correlates on DBM across countries
- The use of cross-sectional surveys may not allow to establish causation
- Due to data limitation, the DBM was examined only at the population or national level

## Introduction

The Double Burden of Malnutrition (DBM), which is the coexistence of both undernutrition and over-nutrition in the same population across the life course is a global public health problem (1, 2). Data from the World Health Organization (WHO) indicate that in 2014, 1.9 billion adults aged 18 years and above were overweight, while over 600 million were obese globally (1). Similarly, in the same year, 462 million adults were underweight and 264 million women of reproductive age were affected by iron-amenable anaemia (2, 3). These key indicators of DBM are also increasing globally, with the low and middle income countries (LMICs) being the most affected (4). For example, while globally, obesity has doubled in the last three decades, it has tripled in LMICs in just two decades (5). An analysis of survey data from 24 African countries spanning 25 years, revealed that overweight and obesity among women are on the rise (6). Also, comparative analysis of data on women and men in the developing countries showed that DBM tends to disproportionately affect women than men (7, 8). The vulnerability of women to DBM may be attributed to their high nutritional requirements for pregnancy and lactation and also because of gender inequalities in poverty (8). Further evidence suggests that if micronutrient deficiencies are taken into account, Africa is in fact experiencing a triple burden of malnutrition (2, 3). It has been estimated that almost 50 percent of pregnant women in Africa suffer from anaemia, which increases death risk for themselves as well as their unborn babies (2).

Furthermore, the contribution of DBM to the burden of disease has been documented. The available evidence suggests that underweight and obesity are among the top ten leading risk factors for the global burden of disease (9, 10). Furthermore, more recent WHO data have

1  
2  
3 identified underweight among the top four risks factors for the burden of disease in the world, as  
4  
5 measured in disability-adjusted life years (DALYs)—contributing up to 6% of global DALYs (10). The  
6  
7 relationship between maternal and child weight and the consequences on disease incidence later  
8  
9 in life have also been documented. Overweight in motherhood is associated with overweight and  
10  
11 obesity in their offspring (2, 11). Rapid weight gain early in life may predispose to long-term weight  
12  
13 excess or obesity. And as the evidence suggests, obesity is an important underlying cause of many  
14  
15 non-communicable diseases (NCDs), including hypertension, diabetes, cancer, stroke, and  
16  
17 ischemic heart disease (3, 5, 11). These diseases are responsible for most of the deaths worldwide,  
18  
19 with LMICs disproportionately bearing the brunt, where 80% of the NCD deaths occur (2-4).  
20  
21 Experts warned that unless countries in Africa start enacting measures to tackle the DBM affecting  
22  
23 the continent, the road towards universal health care (UHC) will be marred with obstacles as will  
24  
25 the aspiration to achieve health and wellbeing for all by 2030 (12).  
26  
27  
28  
29  
30  
31  
32  
33  
34  
35

36 It is important to underscore that DBM can exist at the individual, household and population levels  
37  
38 (2). For instance, at the individual level, obesity can occur with deficiency of one or various vitamins  
39  
40 and minerals, or overweight in an adult who was stunted during childhood. At the household level,  
41  
42 a mother may be overweight or anaemic and a child or grandparent is underweight. DBM at the  
43  
44 population level occurs when there is a prevalence of both under- and over-nutrition in the same  
45  
46 community, nation or region (2). Since it will be difficult to determine individual and within  
47  
48 households DBM using these data, our definition of DBM is at population or country level, whereby  
49  
50 underweight and overweight/obesity co-exist in the same country. Undoubtedly, the DBM offers  
51  
52 an important opportunity for use of multidimensional approaches in tackling malnutrition in all its  
53  
54  
55  
56  
57

1  
2  
3 forms. Addressing the DBM will be key to achieving the Sustainable Development Goals (in  
4 particular Goal 2 and Target 3.4) and the Commitments of the Rome Declaration on Nutrition,  
5 within the UN Decade of Action on Nutrition (1). However, as a starting point, countries need to  
6 understand the key correlates of DBM. The present paper attempts to elucidate these correlates.  
7  
8  
9  
10  
11  
12  
13  
14  
15

16 The factors influencing DBM are complex; ranging from biological to environmental factors (2).  
17 Some of these factors may include, poor water and sanitation systems, weak public health systems  
18 thereby thwarting efforts to reduce undernutrition (2). Also, increasing urbanization and changing  
19 dietary patterns and sedentary lifestyles, income level, older age, household wealth, higher  
20 education, place of residence among others have been identified as key contributing factors to the  
21 DBM epidemic (13-16). For example, Kamal and colleagues observed in their study that household  
22 wealth index and place of residence are key predictors of the DBM among women in Bangladesh  
23 (17). Women from the poorest wealth quintile were more likely to suffer from DBM relative to  
24 those from the richest wealth quintile. Besides, marital status, age at first childbirth, parity,  
25 household size and food security were also found to play a critical role in the DBM epidemic (14,  
26 17, 18). The above referenced studies used data from a single country, masking differences and  
27 commonalities of the effects of the correlates on DBM across countries. The present study is  
28 intended to fill this gap.  
29  
30  
31  
32  
33  
34  
35  
36  
37  
38  
39  
40  
41  
42  
43  
44  
45  
46  
47  
48  
49  
50  
51

52 Given the anticipated long-term effects of DBM, the factors that are associated with being  
53 underweight, overweight or obese should be considered while formulating effective interventions  
54  
55  
56  
57



1  
2  
3 to address DBM among women (15, 16). This stresses the need for prevention strategies targeted  
4  
5 at addressing all forms of malnutrition. The present study is well positioned to provide evidence  
6  
7 on the key correlates of DBM in SSA, which is currently lacking in the region. Understanding the  
8  
9 role of these risk factors is key to developing clear and effective strategies for improving public  
10  
11 health in SSA. The overarching aim of our study is to examine the correlates of DBM among women  
12  
13 in five SSA countries.  
14  
15  
16  
17  
18  
19  
20

## 21 **Methodology**

### 22 ***Sources of data and sampling procedure***

#### 23 *Design and data sources*

24  
25  
26  
27  
28  
29  
30 The study used the recent Demographic and Health Surveys (DHS) (19) data from Ghana (2014),  
31  
32 Kenya (2014), Nigeria (2013), Mozambique (2011) and Democratic Republic of Congo (DRC) (2013-  
33  
34 2014). These are nationally representative, repeated cross-sectional household surveys collected  
35  
36 primarily in lower- and middle-income countries approximately every 5 years and standardized to  
37  
38 enable cross-country comparisons (20, 21). The design of the DHS surveys is identical across all  
39  
40 participating countries, making possible the comparisons between and across countries. The DHS  
41  
42 utilizes a two-stage sample design (22-26). The first stage involves the selection of sample points  
43  
44 or clusters from an updated master sampling frame constructed from National Population and  
45  
46 Housing Census of the respective countries. The clusters are selected using systematic sampling  
47  
48 with probability proportional to size. Household listing is then conducted in all the selected clusters  
49  
50 to provide a sampling frame for the second stage selection of households. The second stage of  
51  
52  
53  
54  
55  
56  
57  
58  
59  
60

1  
2  
3 selection involves the systematic sampling of the households listed in each cluster, and households  
4  
5 to be included in the survey are randomly selected from the list. The rationale for the second stage  
6  
7 selection is to ensure adequate numbers of completed individual interviews to provide estimates  
8  
9 for key indicators with an acceptable precision. All men and women aged 15-59 and 15-49  
10  
11 respectively, in the selected households (men in half of the households) were eligible to participate  
12  
13 in the surveys if they were either usual residents of the household or visitors present in the  
14  
15 household on the night before the survey. We limited our analyses to women aged 15–49 years in  
16  
17 all countries and who have complete anthropometry data. The samples for the respective  
18  
19 countries are as follows: DRC (9,506), Ghana (3,012), Kenya (9,993), Mozambique (11,017) and  
20  
21 Nigeria (31,170).  
22  
23  
24  
25  
26  
27  
28  
29  
30

### 31 **Outcome and predictor variables**

32  
33  
34 *Outcome variables:* The outcome variable of interest was women body mass index (BMI) derived  
35  
36 from results of height and weight measurements. The Height and weight were measured  
37  
38 objectively by trained field technicians using standard techniques (21). Weight measurements  
39  
40 were taken using electronic Seca scales with a digital screen, while height measurements were  
41  
42 taken using a stadiometer produced by Shorr Productions. BMI, also referred to as Quetelet's Index  
43  
44 (27), was derived by dividing weight in kilograms by the squared height in meters. Based on the  
45  
46 BMI ( $\text{kg}/\text{m}^2$ ) estimates, and according to World Health Organization guidelines (28), the  
47  
48 participants were classified as underweight ( $\text{BMI} < 18.50 \text{ kg}/\text{m}^2$ ), normal weight ( $18.50\text{-}24.99$   
49  
50  $\text{kg}/\text{m}^2$ ), overweight ( $25.0\text{-}29.9 \text{ kg}/\text{m}^2$ ) and obese ( $\geq 30.0 \text{ kg}/\text{m}^2$ ). The normal weight ( $18.50\text{-}24.99$   
51  
52  $\text{kg}/\text{m}^2$ ) was used as reference category in the analysis.  
53  
54  
55  
56  
57  
58  
59  
60

*Predictor variables:* The predictor variables of interest used in the analysis included, women's age, education, employment status, breastfeeding status, parity, place of residence, marital status, women decision making autonomy (decision on large household purchases and decision on health), household size, frequency of watching TV and household wealth index. These potential correlates were identified based on literature search and further subjected to bivariate analysis (Table 2) to establish their relationship with the DBM indicators. All statistically significant variables were included in the multivariate analysis.

### *Analytical strategy*

We utilized Multinomial logistic regression (MLR) in the analysis. MLR approach was contemplated to be suitable as the outcome measure is polychotomous by nature. Further, the MLR was considered attractive analytical technique because it does not assume normality, linearity, or homoscedasticity (29). In MLR, we observe vectors  $Y = (y_1, y_2, \dots, y_{k+1})^T$ ;  $y_i = 0$  for all  $i$ , and one  $j$  with  $y_j = 1$  and corresponding probability  $p_j$ , implying

$$EY = p, \text{Cov } Y = \Lambda_p - pp^T, \quad \Lambda_p = \begin{pmatrix} p_1 & \dots & 0 \\ \vdots & \dots & \vdots \\ 0 & \dots & p_{k+1} \end{pmatrix} \quad (1)$$

The multinomial logistic regression is given by

$$p_i = \frac{\exp(\pi^{(i)T} x)}{1 + \sum_{j=1}^k \exp(\pi^{(j)T} x)} \quad \text{for } i = 1, \dots, k \quad (2)$$

$$p_{k+1} = \frac{1}{1 + \sum_{j=1}^k \exp(\pi^{(j)T} x)} \quad (3)$$

Where  $x = (x_1, x_2, \dots, x_m)^T$  is the vector of covariates, and  $\pi^{(i)}$  is the parameter vector corresponding to the  $i$ -th response category. In Equation (3), the parameters are set to zero and allows computing the probability for the base category in the MLR.

Because of the normalization condition,

$$\sum_{j=1}^k P(y^{(j)} = 1 | x, \pi) = 1, \quad (4)$$

the weight vector of one of the classes need not to be estimated without loss of generality, in this case the  $(j+1)$ -th category. To perform maximum likelihood (ML), one simply maximizes the log-likelihood function using Equation (5),

$$\log \prod_{j=1}^{k+1} p_j^{y_j} = \sum_{j=1}^k y_j \pi^{(i)^T} x - \log \left[ 1 + \sum_{j=1}^k \exp(\pi^{(i)^T} x) \right] \quad (5)$$

The MLR model was constructed to investigate the net effects of the correlates on underweight, overweight, and obesity. Using a BMI category of 18.5–24.99 kg/m<sup>2</sup> (normal weight) as the reference, a set of logistic regressions for underweight, overweight and obese categories was estimated in which, each of the categories was contrasted with the reference category. Since there was no candidate predictor variable, all covariates were simultaneously entered into the model. Results were presented in the form of coefficients with significance levels and 95% confidence intervals (95% CI).

## Results

### Descriptive

Table 1 and 2 present the characteristics of the samples. The results in Table 1 shows that among the five countries, Mozambique had the highest number of normal weight women (78%) followed by DRC (74%), with Ghana having the lowest (59%). Kenya (12%) and DRC (13%) had the highest prevalence of underweight women, while Ghana had the highest number of overweight (23%) and obese (12%) women. In all the countries analysed, the prevalence of overweight and obesity had overtaken underweight. Women in Kenyan data had more years of education, while Mozambique had women with the least years of education (Table 2). The age of study participants was fairly the same across all the five countries and ranged from 28 years in Mozambique and Kenya to 30 years in Ghana. Further, among all the countries, Ghana had the highest number of women who were working (79%), while Mozambique had the lowest (39%).

**Table 1: Characteristics of the BMI samples**

| Variables                       | DRC<br>Mean/% | Ghana<br>Mean/% | Kenya<br>Mean/% | Mozambique<br>Mean/% | Nigeria<br>Mean/% |
|---------------------------------|---------------|-----------------|-----------------|----------------------|-------------------|
| <b>Body mass index (BMI)</b>    |               |                 |                 |                      |                   |
| BMI=18.50-24.99 (normal weight) | 73.50         | 59.20           | 62.00           | 77.60                | 66.10             |
| BMI<18.50 (underweight)         | 12.70         | 5.30            | 11.80           | 5.70                 | 8.70              |
| BMI= 25-29.99 (overweight)      | 11.50         | 23.40           | 18.90           | 13.70                | 18.30             |
| BMI>=30 (obesity)               | 2.30          | 12.20           | 7.30            | 3.00                 | 7.00              |

**Table 2: Characteristics of the samples, categorical and continuous variables**

| Variables                     | DRC<br>Mean/%       | Ghana<br>Mean/%     | Kenya<br>Mean/%     | Mozambique<br>Mean/% | Nigeria<br>Mean/%    |
|-------------------------------|---------------------|---------------------|---------------------|----------------------|----------------------|
| Women's Education (in years)  | 5.179***<br>(0.120) | 6.018***<br>(0.188) | 7.571***<br>(0.093) | 3.063***<br>(0.082)  | 4.722***<br>(0.125)  |
| Women's Age (in years)        | 29.20***<br>(0.117) | 30.57***<br>(0.201) | 28.60***<br>(0.103) | 28.57***<br>(0.119)  | 29.37***<br>(0.0782) |
| <b>Household wealth index</b> |                     |                     |                     |                      |                      |
| Poorest                       | 22.4***             | 22.7***             | 23.4***             | 23.6***              | 23.5***              |

|    |                                              |          |          |          |          |          |
|----|----------------------------------------------|----------|----------|----------|----------|----------|
| 1  |                                              |          |          |          |          |          |
| 2  |                                              |          |          |          |          |          |
| 3  |                                              | (0.012)  | (0.016)  | (0.010)  | (0.012)  | (0.012)  |
| 4  | Poorer                                       | 23.0***  | 19.8***  | 20.3***  | 21.4***  | 23.1***  |
| 5  |                                              | (0.014)  | (0.012)  | (0.008)  | (0.008)  | (0.009)  |
| 6  | Middle                                       | 20.6***  | 20.6***  | 18.5***  | 20.0***  | 18.9***  |
| 7  |                                              | (0.010)  | (0.014)  | (0.007)  | (0.009)  | (0.008)  |
| 8  | Rich                                         | 18.6***  | 18.7***  | 18.2***  | 19.9***  | 17.8***  |
| 9  |                                              | (0.016)  | (0.015)  | (0.008)  | (0.009)  | (0.007)  |
| 10 | Richest                                      | 15.5***  | 18.2***  | 19.6***  | 15.1***  | 16.8***  |
| 11 |                                              | (0.014)  | (0.017)  | (0.011)  | (0.008)  | (0.008)  |
| 12 | Respondent currently working (yes)           | 74.9***  | 78.8***  | 63.6***  | 39.3***  | 68.9***  |
| 13 |                                              | (0.016)  | (0.014)  | (0.010)  | (0.011)  | (0.008)  |
| 14 | Place of residence (urban)                   | 29.9***  | 45.4***  | 36.1***  | 27.5***  | 35.0***  |
| 15 |                                              | (0.018)  | (0.020)  | (0.011)  | (0.011)  | (0.011)  |
| 16 | Household head (Female)                      | 21.6***  | 26.0***  | 30.4***  | 30.3***  | 9.7***   |
| 17 |                                              | (0.009)  | (0.015)  | (0.009)  | (0.008)  | (0.004)  |
| 18 | Parity                                       | 4.434*** | 3.552*** | 3.540*** | 3.928*** | 4.328*** |
| 19 |                                              | (0.049)  | (0.067)  | (0.043)  | (0.041)  | (0.034)  |
| 20 | Household size                               | 6.826*** | 5.573*** | 5.626*** | 5.967*** | 7.007*** |
| 21 |                                              | (0.085)  | (0.093)  | (0.057)  | (0.053)  | (0.061)  |
| 22 |                                              |          |          |          |          |          |
| 23 |                                              |          |          |          |          |          |
| 24 | <b>Frequency of watching TV</b>              |          |          |          |          |          |
| 25 | Not at all                                   | 66.4***  | 19.6***  | 22.0***  | 34.5***  | 39.8***  |
| 26 |                                              | (0.014)  | (0.015)  | (0.008)  | (0.009)  | (0.010)  |
| 27 | Less than once a week                        | 14.6***  | 32.7***  | 12.5***  | 23.2***  | 25.0***  |
| 28 |                                              | (0.009)  | (0.016)  | (0.006)  | (0.007)  | (0.008)  |
| 29 | At least once a week                         | 19.0***  | 47.7***  | 65.5***  | 42.3***  | 35.2***  |
| 30 |                                              | (0.011)  | (0.017)  | (0.010)  | (0.010)  | (0.009)  |
| 31 | Currently breastfeeding (yes)                | 68.6***  | 57.8***  | 54.0***  | 60.8***  | 54.8***  |
| 32 |                                              | (0.009)  | (0.016)  | (0.009)  | (0.008)  | (0.006)  |
| 33 |                                              |          |          |          |          |          |
| 34 | <b>Marital status</b>                        |          |          |          |          |          |
| 35 | Never Married                                | 4.3***   | 7.1***   | 7.1***   | 4.2***   | 1.6***   |
| 36 |                                              | (0.005)  | (0.008)  | (0.004)  | (0.003)  | (0.001)  |
| 37 | Married or Cohabiting                        | 87.2***  | 86.5***  | 83.7***  | 84.3***  | 95.9***  |
| 38 |                                              | (0.007)  | (0.011)  | (0.006)  | (0.006)  | (0.002)  |
| 39 | Formerly in union                            | 8.5***   | 6.4***   | 9.2***   | 11.5***  | 2.6***   |
| 40 |                                              | (0.006)  | (0.007)  | (0.005)  | (0.005)  | (0.001)  |
| 41 |                                              |          |          |          |          |          |
| 42 | <b>Decision on large household purchases</b> |          |          |          |          |          |
| 43 | Respondent alone                             | 8.7***   | 20.8***  | 29.1***  | 17.2***  | 4.7***   |
| 44 |                                              | (0.007)  | (0.014)  | (0.008)  | (0.007)  | (0.003)  |
| 45 | Both Respondent and partner                  | 31.0***  | 42.7***  | 34.2***  | 39.1***  | 29.2***  |
| 46 |                                              | (0.015)  | (0.020)  | (0.009)  | (0.009)  | (0.009)  |
| 47 | Partner alone                                | 47.3***  | 22.2***  | 20.1***  | 27.5***  | 61.6***  |
| 48 |                                              | (0.015)  | (0.017)  | (0.007)  | (0.009)  | (0.010)  |
| 49 | Someone else/Other                           | 0.2***   | 0.9***   | 0.4***   | 0.6***   | 0.2***   |
| 50 |                                              | (0.001)  | (0.002)  | (0.001)  | (0.001)  | (0.0004) |
| 51 |                                              |          |          |          |          |          |
| 52 | <b>Decision on respondent's health</b>       |          |          |          |          |          |
| 53 | Respondent alone                             | 13.8***  | 16.3***  | 14.7***  | 10.00*** | 4.34***  |
| 54 |                                              | (0.010)  | (0.012)  | (0.006)  | (0.005)  | (0.002)  |
| 55 | Both Respondent and partner                  | 37.2***  | 44.8***  | 42.2***  | 38.2***  | 28.4***  |
| 56 |                                              |          |          |          |          |          |
| 57 |                                              |          |          |          |          |          |
| 58 |                                              |          |          |          |          |          |
| 59 |                                              |          |          |          |          |          |
| 60 |                                              |          |          |          |          |          |

|                    |         |         |         |         |          |
|--------------------|---------|---------|---------|---------|----------|
|                    | (0.013) | (0.018) | (0.010) | (0.009) | (0.009)  |
| Partner alone      | 35.6*** | 24.4*** | 26.3*** | 35.4*** | 62.8***  |
|                    | (0.015) | (0.015) | (0.009) | (0.009) | (0.010)  |
| Someone else/Other | 0.3***  | 1.0***  | 0.4***  | 0.7***  | 0.2***   |
|                    | (0.001) | (0.003) | (0.001) | (0.001) | (0.0004) |
| Observations       | 9,506   | 3,012   | 9,993   | 11,017  | 31,170   |

Standard errors in parentheses

\*\*\* p<0.01, \*\* p<0.05, \* p<0.1

### *Multivariate*

Tables 3-7 present the MLR results of the correlates of DBM among women in DRC, Ghana, Kenya, Mozambique and Nigeria. The results showed a significant positive relationship between women's years' of education and overweight in Ghana, overweight and obesity in Mozambique and Nigeria. Thus, compared with normal weight women, an additional year of education was associated with a higher likelihood of overweight and obesity in Ghana, Mozambique and Nigeria. Conversely, number of years of education was associated negatively with underweight in Kenya and Nigeria relative to normal weight. Also, older age was significantly and positively associated with underweight, overweight and obesity compared to normal weight women in all countries included in the analysis. An exception could be made of Nigeria where older age was inversely related to underweight. The results in relation to household wealth index were mixed. While generally, significant positive associations were observed between wealth index (middle, richer and richest quintiles) and overweight and obesity in all the five countries, inverse relationship was observed for underweight. Compared to normal weight women, higher maternal parity was inversely related to underweight in Ghana and Mozambique, and both underweight and overweight in Kenya. In DRC, maternal parity was inversely related to underweight and positively related to obesity. Breastfeeding was associated with less likelihood of underweight among women in DRC and

Nigeria, obesity in DRC and Ghana, overweight in Kenya, and overweight and obesity in Mozambique and Nigeria relative to normal weight women.

**Table 3: Multivariate analysis of the association between sociodemographic correlates and malnutrition, DRC**

| Variables                       | Underweight<br>(BMI<18.50)     | Overweight<br>(BMI=25-29.99)   | Obesity<br>(BMI >=30)         |
|---------------------------------|--------------------------------|--------------------------------|-------------------------------|
| Women's Education (in years)    | 0.030*<br>(-0.004 - 0.064)     | -0.011<br>(-0.052 - 0.030)     | -0.023<br>(-0.093 - 0.047)    |
| Women's Age (in years)          | 0.041***<br>(0.015 - 0.068)    | 0.034**<br>(0.007 - 0.060)     | -0.045<br>(-0.104 - 0.015)    |
| <b>Household wealth Index</b>   |                                |                                |                               |
| Poorest (reference)             |                                |                                |                               |
| Poorer                          | -0.009<br>(-0.306 - 0.288)     | -0.069<br>(-0.488 - 0.351)     | -0.241<br>(-1.575 - 1.094)    |
| Middle                          | -0.144<br>(-0.534 - 0.247)     | 0.421**<br>(0.039 - 0.804)     | 0.570<br>(-0.529 - 1.669)     |
| Rich                            | -0.480**<br>(-0.942 - -0.018)  | 0.803*<br>(0.345 - 1.261)      | 2.365***<br>(1.225 - 3.505)   |
| Richest                         | -1.017***<br>(-1.564 - -0.471) | 1.486*<br>(0.985 - 1.987)      | 4.014***<br>(2.562 - 5.465)   |
| Woman currently working (yes)   | 0.226<br>(-0.052 - 0.504)      | -0.462***<br>(-0.794 - -0.131) | -0.350<br>(-0.850 - 0.149)    |
| Place of residence (urban)      | -0.246<br>(-0.601 - 0.108)     | 0.034<br>(-0.350 - 0.417)      | -0.094<br>(-0.810 - 0.622)    |
| Sex of household head (female)  | -0.0453<br>(-0.377 - 0.286)    | 0.167<br>(-0.144 - 0.478)      | 0.363<br>(-0.380 - 1.105)     |
| Parity                          | -0.122***<br>(-0.199 - -0.045) | 0.0335<br>(-0.040 - 0.107)     | 0.350***<br>(0.174 - 0.525)   |
| Household size                  | -0.019<br>(-0.066 - 0.028)     | -0.008<br>(-0.048 - 0.031)     | -0.052<br>(-0.158 - 0.056)    |
| <b>Frequency of watching TV</b> |                                |                                |                               |
| Not at all (reference)          |                                |                                |                               |
| Less than once a week           | 0.089<br>(-0.251 - 0.429)      | 0.165<br>(-0.192 - 0.522)      | -0.209<br>(-0.912 - 0.494)    |
| At least once a week            | -0.163<br>(-0.623 - 0.298)     | 0.180<br>(-0.140 - 0.500)      | 0.149<br>(-0.373 - 0.671)     |
| Currently breastfeeding         | 0.327***<br>(0.082 - 0.572)    | -0.010<br>(-0.361 - 0.164)     | -0.512**<br>(-1.020 - -0.005) |
| <b>Marital status</b>           |                                |                                |                               |
| Never in union (reference)      |                                |                                |                               |
| Married or Cohabiting           | -0.766*<br>(-1.104 - -0.428)   | 0.809*<br>(0.345 - 1.273)      | 0.248<br>(-0.104 - 0.600)     |



|    |                                          |                   |                   |                     |
|----|------------------------------------------|-------------------|-------------------|---------------------|
| 1  |                                          |                   |                   |                     |
| 2  |                                          |                   |                   |                     |
| 3  |                                          | (-1.567 - 0.0347) | (0.132 - 1.486)   | (-1.131 - 1.626)    |
| 4  | Formerly in union                        | -0.357            | 0.0680            | -0.549              |
| 5  |                                          | (-1.126 - 0.413)  | (-0.583 - 0.718)  | (-1.956 - 0.859)    |
| 6  | <b>Decision on large household</b>       |                   |                   |                     |
| 7  | <b>purchases</b>                         |                   |                   |                     |
| 8  |                                          |                   |                   |                     |
| 9  | Respondent alone (reference)             |                   |                   |                     |
| 10 | Both Respondent and partner              | 0.186             | 0.155             | 0.885*              |
| 11 |                                          | (-0.292 - 0.664)  | (-0.291 - 0.601)  | (-0.154 - 1.923)    |
| 12 | Partner alone                            | 0.436*            | 0.098             | 0.423               |
| 13 |                                          | (-0.059 - 0.931)  | (-0.325 - 0.522)  | (-0.370 - 1.215)    |
| 14 | Someone else/Other                       | -0.787            | -3.160***         | -12.640***          |
| 15 |                                          | (-2.567 - 0.993)  | (-5.513 - -0.808) | (-14.160 - -11.130) |
| 16 |                                          |                   |                   |                     |
| 17 | <b>Decision on respondent's health</b>   |                   |                   |                     |
| 18 | Respondent alone (reference)             |                   |                   |                     |
| 19 | Both Respondent and partner              | -0.180            | -0.332            | -0.743*             |
| 20 |                                          | (-0.599 - 0.239)  | (-0.731 - 0.067)  | (-1.594 - 0.109)    |
| 21 | Partner alone                            | -0.176            | -0.525**          | -0.602*             |
| 22 |                                          | (-0.552 - 0.201)  | (-0.933 - -0.116) | (-1.282 - 0.078)    |
| 23 | Someone else/Other                       | 1.672**           | 0.687             | -14.200***          |
| 24 |                                          | (0.073 - 3.272)   | (-1.990 - 3.363)  | (-15.970 - -12.430) |
| 25 |                                          |                   |                   |                     |
| 26 |                                          |                   |                   |                     |
| 27 | Observations                             | 9,506             | 9,506             | 9,506               |
| 28 | Confidence Intervals (CI) in parentheses |                   |                   |                     |
| 29 | *** p<0.01, ** p<0.05, * p<0.1           |                   |                   |                     |
| 30 |                                          |                   |                   |                     |
| 31 |                                          |                   |                   |                     |
| 32 |                                          |                   |                   |                     |
| 33 |                                          |                   |                   |                     |

**Table 4: Multivariate analysis of the association between sociodemographic correlates and malnutrition, Ghana**

| Variables                     | Underweight<br>BMI<18.50       | Overweight<br>BMI=25-29.99  | Obesity<br>BMI>= 30         |
|-------------------------------|--------------------------------|-----------------------------|-----------------------------|
| Women's Education (in years)  | -0.022<br>(-0.080 - 0.036)     | 0.074***<br>(0.037 - 0.110) | 0.028<br>(-0.014 - 0.070)   |
| Women's Age (in years)        | 0.054**<br>(0.005 - 0.103)     | 0.0405**<br>(0.008 - 0.073) | 0.083***<br>(0.048 - 0.118) |
| <b>Household wealth index</b> |                                |                             |                             |
| Poorest (reference)           |                                |                             |                             |
| Poorer                        | -0.398<br>(-0.972 - 0.177)     | 0.367<br>(-0.129 - 0.864)   | 1.390***<br>(0.582 - 2.197) |
| Middle                        | -1.050***<br>(-1.768 - -0.331) | 0.893*<br>(0.340 - 1.447)   | 2.804***<br>(1.947 - 3.662) |
| Rich                          | -0.529<br>(-1.426 - 0.369)     | 1.436*<br>(0.878 - 1.995)   | 3.591***<br>(2.615 - 4.568) |
| Richest                       | -1.788***<br>(-3.052 - -0.523) | 1.271*<br>(0.555 - 1.988)   | 4.121***<br>(3.125 - 5.117) |
| Woman currently working (yes) | -0.125<br>(-0.713 - 0.463)     | 0.121<br>(-0.238 - 0.481)   | 0.0769<br>(-0.424 - 0.577)  |

|                                              |                   |                   |                   |
|----------------------------------------------|-------------------|-------------------|-------------------|
| Place of residence (urban)                   | 0.463*            | 0.113             | -0.073            |
|                                              | (-0.0488 - 0.975) | (-0.250 - 0.477)  | (-0.582 - 0.435)  |
| Sex of household head (female)               | 0.409             | 0.0971            | 0.293             |
|                                              | (-0.276 - 1.093)  | (-0.309 - 0.503)  | (-0.173 - 0.759)  |
| Parity                                       | -0.205**          | 0.0719            | 0.0324            |
|                                              | (-0.372 - -0.038) | (-0.055 - 0.199)  | (-0.118 - 0.183)  |
| Household size                               | 0.021             | -0.047            | 0.035             |
|                                              | (-0.045 - 0.086)  | (-0.121 - 0.027)  | (-0.077 - 0.147)  |
| <b>Frequency of watching TV</b>              |                   |                   |                   |
| Not at all (reference)                       |                   |                   |                   |
| Less than once a week                        | -0.043            | 0.231             | 0.673*            |
|                                              | (-0.604 - 0.518)  | (-0.240 - 0.703)  | (0.0003 - 1.345)  |
| At least once a week                         | -0.233            | 0.248             | 0.756**           |
|                                              | (-0.754 - 0.287)  | (-0.184 - 0.679)  | (0.146 - 1.365)   |
| Currently breastfeeding (yes)                | 0.136             | -0.177            | -0.471**          |
|                                              | (-0.364 - 0.637)  | (-0.525 - 0.171)  | (-0.832 - -0.110) |
| <b>Marital status</b>                        |                   |                   |                   |
| Never in union (reference)                   |                   |                   |                   |
| Married or Cohabiting                        | -0.536            | -0.259            | 0.295             |
|                                              | (-1.843 - 0.772)  | (-0.904 - 0.386)  | (-0.860 - 1.451)  |
| Formerly in union                            | 0.271             | 0.420             | 1.435*            |
|                                              | (-0.837 - 1.378)  | (-0.286 - 1.126)  | (0.400 - 2.470)   |
| <b>Decision on large household purchases</b> |                   |                   |                   |
| Respondent alone (reference)                 |                   |                   |                   |
| Both Respondent and partner                  | 0.464             | -0.0143           | -0.0496           |
|                                              | (-0.555 - 1.483)  | (-0.523 - 0.495)  | (-0.657 - 0.557)  |
| Partner alone                                | 0.664             | -0.0223           | -0.265            |
|                                              | (-0.217 - 1.546)  | (-0.556 - 0.512)  | (-0.917 - 0.386)  |
| Someone else/Other                           | -1.212            | -0.0290           | 0.752             |
|                                              | (-3.637 - 1.213)  | (-1.485 - 1.426)  | (-1.161 - 2.665)  |
| <b>Decision on respondent's health</b>       |                   |                   |                   |
| Respondent alone (reference)                 |                   |                   |                   |
| Both Respondent and partner                  | 0.0525            | 0.785*            | 0.787*            |
|                                              | (-0.868 - 0.973)  | (0.280 - 1.290)   | (0.166 - 1.408)   |
| Partner alone                                | 0.119             | 0.526*            | 0.915*            |
|                                              | (-0.643 - 0.881)  | (-0.0457 - 1.098) | (0.156 - 1.675)   |
| Someone else/Other                           | -0.714            | -1.544            | -13.43***         |
|                                              | (-2.832 - 1.403)  | (-3.520 - 0.433)  | (-15.04 - -11.81) |
| Observations                                 | 3,012             | 3,012             | 3,012             |

Confident Intervals (CI) in parentheses

\*\*\* p<0.01, \*\* p<0.05, \* p<0.1

**Table 5: Multivariate analysis of the association between sociodemographic correlates and malnutrition, Kenya**

| Variables                                    | Underweight<br>(BMI<18.50)     | Overweight<br>(BMI=25.29.99)   | Obesity<br>(BMI>=30)        |
|----------------------------------------------|--------------------------------|--------------------------------|-----------------------------|
| Women's Education (in years)                 | -0.113***<br>(-0.148 - -0.078) | 0.013<br>(-0.016 - 0.042)      | 0.013<br>(-0.030 - 0.056)   |
| Women's Age (in years)                       | 0.026**<br>(0.001 - 0.052)     | 0.066***<br>(0.046 - 0.089)    | 0.120***<br>(0.087 - 0.153) |
| <b>Household wealth index</b>                |                                |                                |                             |
| Poorest (reference)                          |                                |                                |                             |
| Poorer                                       | -0.488***<br>(-0.805 - -0.172) | 0.279*<br>(-0.025 - 0.582)     | 0.633*<br>(0.080 - 1.187)   |
| Middle                                       | -0.500***<br>(-0.869 - -0.130) | 0.609***<br>(0.261 - 0.957)    | 0.790*<br>(0.268 - 1.311)   |
| Rich                                         | -0.940***<br>(-1.376 - -0.504) | 0.927*<br>(0.578 - 1.276)      | 1.690***<br>(1.164 - 2.216) |
| Richest                                      | -1.307***<br>(-1.946 - -0.668) | 1.427***<br>(1.042 - 1.813)    | 2.616***<br>(2.049 - 3.184) |
| Woman currently working (yes)                | -0.357***<br>(-0.590 - -0.123) | 0.0162<br>(-0.221 - 0.253)     | 0.210<br>(-0.110 - 0.529)   |
| Place of residents (urban)                   | 0.0337<br>(-0.272 - 0.339)     | 0.107<br>(-0.115 - 0.330)      | 0.497***<br>(0.177 - 0.817) |
| Sex of household head (female)               | 0.230<br>(-0.0570 - 0.518)     | 0.0205<br>(-0.177 - 0.218)     | -0.0346<br>(-0.336 - 0.267) |
| Parity                                       | -0.164***<br>(-0.243 - -0.085) | -0.118***<br>(-0.190 - -0.046) | -0.084<br>(-0.199 - 0.030)  |
| Household size                               | -0.035<br>(-0.089 - 0.019)     | 0.013<br>(-0.034 - 0.061)      | 0.034<br>(-0.044 - 0.111)   |
| <b>Frequency of watching TV</b>              |                                |                                |                             |
| Not at all                                   |                                |                                |                             |
| Less than once a week                        | -0.539***<br>(-0.905 - -0.174) | 0.076<br>(-0.295 - 0.447)      | -0.131<br>(-0.700 - 0.439)  |
| At least once a week                         | -0.066<br>(-0.355 - 0.223)     | 0.043<br>(-0.194 - 0.281)      | 0.035<br>(-0.357 - 0.426)   |
| Currently breastfeeding (yes)                | 0.102<br>(-0.112 - 0.316)      | -0.156*<br>(-0.338 - 0.026)    | -0.204<br>(-0.510 - 0.102)  |
| <b>Marital status</b>                        |                                |                                |                             |
| Never in union (reference)                   |                                |                                |                             |
| Married or Cohabiting                        | 0.299<br>(-0.197 - 0.794)      | 0.870*<br>(0.422 - 1.317)      | 0.898*<br>(0.212 - 1.584)   |
| Formerly in union                            | 0.209<br>(-0.339 - 0.756)      | 0.488**<br>(0.047 - 0.929)     | 0.312<br>(-0.392 - 1.017)   |
| <b>Decision on household large purchases</b> |                                |                                |                             |
| Respondent alone (reference)                 |                                |                                |                             |
| Both Respondent and partner                  | -0.217<br>(-0.546 - 0.113)     | -0.303**<br>(-0.543 - -0.063)  | 0.0495<br>(-0.259 - 0.358)  |

|                                        |                   |                  |                     |
|----------------------------------------|-------------------|------------------|---------------------|
| Partner alone                          | -0.298*           | -0.0677          | -0.128              |
|                                        | (-0.641 - 0.045)  | (-0.350 - 0.215) | (-0.528 - 0.273)    |
| Someone else/Other                     | -2.309***         | -0.970           | -13.66***           |
|                                        | (-4.053 - -0.565) | (-3.170 - 1.231) | (-14.580 - -12.730) |
| <b>Decision on respondent's health</b> |                   |                  |                     |
| Respondent alone (reference)           |                   |                  |                     |
| Both Respondent and partner            | -0.0559           | 0.0704           | -0.131              |
|                                        | (-0.427 - 0.315)  | (-0.194 - 0.335) | (-0.524 - 0.262)    |
| Partner alone                          | -0.220            | -0.016           | -0.183              |
|                                        | (-0.601 - 0.161)  | (-0.301 - 0.268) | (-0.633 - 0.266)    |
| Someone else/Other                     | -2.446***         | 0.092            | -12.920***          |
|                                        | (-4.226 - -0.666) | (-2.677 - 2.862) | (-14.610 - -11.230) |
| Observations                           | 9,993             | 9,993            | 9,993               |

Confidence Intervals (CI) in parentheses

\*\*\* p<0.01, \*\* p<0.05, \* p<0.1

**Table 6: Multivariate analysis of the association between sociodemographic correlates and malnutrition, Mozambique**

| Variables                       | Underweight<br>(BMI<18.50)     | Overweight<br>(BMI=25-29.99) | Obesity<br>(BMI>=30)        |
|---------------------------------|--------------------------------|------------------------------|-----------------------------|
| Women's Education (yes)         | 0.011<br>(-0.041 - 0.063)      | 0.044***<br>(0.0127 - 0.076) | 0.098***<br>(0.041 - 0.156) |
| Women's Age (in years)          | 0.018<br>(-0.013 - 0.049)      | 0.032***<br>(0.012 - 0.052)  | 0.075***<br>(0.042 - 0.109) |
| <b>Household Wealth index</b>   |                                |                              |                             |
| Poorest (reference)             |                                |                              |                             |
| Poorer                          | -0.146<br>(-0.479 - 0.187)     | 0.618*<br>(0.222 - 1.015)    | 1.061<br>(-0.529 - 2.650)   |
| Middle                          | -0.741***<br>(-1.118 - -0.365) | 0.856*<br>(0.430 - 1.282)    | 2.424***<br>(1.023 - 3.825) |
| Rich                            | -0.618***<br>(-1.081 - -0.154) | 1.235*<br>(0.818 - 1.652)    | 2.905***<br>(1.576 - 4.234) |
| Richest                         | -0.800***<br>(-1.408 - -0.192) | 1.977***<br>(1.517 - 2.437)  | 4.832***<br>(3.496 - 6.168) |
| Woman currently working (yes)   | 0.195<br>(-0.087 - 0.477)      | -0.0795<br>(-0.271 - 0.112)  | 0.014<br>(-0.371 - 0.400)   |
| Place of residence (urban)      | 0.0766<br>(-0.306 - 0.459)     | -0.0722<br>(-0.350 - 0.205)  | -0.0180<br>(-0.504 - 0.468) |
| Sex of household head (female)  | -0.342**<br>(-0.649 - -0.036)  | -0.056<br>(-0.264 - 0.153)   | -0.142<br>(-0.570 - 0.286)  |
| Parity                          | -0.124**<br>(-0.224 - -0.023)  | 0.0379<br>(-0.024 - 0.100)   | 0.160**<br>(0.037 - 0.282)  |
| Household size                  | 0.0161<br>(-0.037 - 0.070)     | -0.010<br>(-0.042 - 0.022)   | -0.037<br>(-0.108 - 0.035)  |
| <b>Frequency of watching TV</b> |                                |                              |                             |

|    |                                              |                   |                   |                    |
|----|----------------------------------------------|-------------------|-------------------|--------------------|
| 1  |                                              |                   |                   |                    |
| 2  |                                              |                   |                   |                    |
| 3  | Not at all (reference)                       |                   |                   |                    |
| 4  | Less than once a week                        | -0.0113           | 0.157             | 0.630***           |
| 5  |                                              | (-0.328 - 0.306)  | (-0.091 - 0.404)  | (0.214 - 1.047)    |
| 6  | At least once a week                         | -0.214            | -0.0124           | 0.044              |
| 7  |                                              | (-0.518 - 0.0895) | (-0.213 - 0.188)  | (-0.329 - 0.418)   |
| 8  | Currently breastfeeding                      | 0.215             | -0.298***         | -0.516**           |
| 9  |                                              | (-0.049 - 0.478)  | (-0.493 - -0.102) | (-0.938 - -0.0944) |
| 10 |                                              |                   |                   |                    |
| 11 | <b>Marital status</b>                        |                   |                   |                    |
| 12 | Never in union (reference)                   |                   |                   |                    |
| 13 | Married or Cohabiting                        | 0.253             | 0.196             | 0.708*             |
| 14 |                                              | (-0.419 - 0.925)  | (-0.223 - 0.615)  | (-0.0469 - 1.462)  |
| 15 | Formerly in union                            | 0.351             | -0.029            | 0.773**            |
| 16 |                                              | (-0.288 - 0.989)  | (-0.462 - 0.404)  | (0.0197 - 1.527)   |
| 17 |                                              |                   |                   |                    |
| 18 | <b>Decision on large household purchases</b> |                   |                   |                    |
| 19 | Respondent alone (reference)                 |                   |                   |                    |
| 20 | Both Respondent and partner                  | -0.096            | -0.0634           | -0.0414            |
| 21 |                                              | (-0.472 - 0.281)  | (-0.329 - 0.202)  | (-0.647 - 0.564)   |
| 22 | Partner alone                                | -0.049            | 0.037             | -0.366             |
| 23 |                                              | (-0.420 - 0.323)  | (-0.256 - 0.329)  | (-1.022 - 0.289)   |
| 24 | Someone else/Other                           | 0.036             | 0.746             | -0.983             |
| 25 |                                              | (-1.044 - 1.115)  | (-0.600 - 2.091)  | (-3.268 - 1.303)   |
| 26 |                                              |                   |                   |                    |
| 27 | <b>Decision on respondent's health</b>       |                   |                   |                    |
| 28 | Respondent alone (reference)                 |                   |                   |                    |
| 29 | Both Respondent and partner                  | -0.184            | -0.134            | -0.143             |
| 30 |                                              | (-0.633 - 0.265)  | (-0.425 - 0.158)  | (-0.777 - 0.491)   |
| 31 | Partner alone                                | -0.317            | -0.148            | 0.227              |
| 32 |                                              | (-0.786 - 0.151)  | (-0.440 - 0.144)  | (-0.360 - 0.814)   |
| 33 | Someone else/Other                           | -0.480            | -0.646            | -1.232             |
| 34 |                                              | (-1.477 - 0.516)  | (-1.649 - 0.357)  | (-3.319 - 0.855)   |
| 35 |                                              |                   |                   |                    |
| 36 |                                              |                   |                   |                    |
| 37 | Observations                                 | 11,017            | 11,017            | 11,017             |
| 38 |                                              |                   |                   |                    |
| 39 | Confidence Intervals (CI) in parentheses     |                   |                   |                    |
| 40 | *** p<0.01, ** p<0.05, * p<0.1               |                   |                   |                    |
| 41 |                                              |                   |                   |                    |
| 42 |                                              |                   |                   |                    |
| 43 |                                              |                   |                   |                    |
| 44 |                                              |                   |                   |                    |
| 45 |                                              |                   |                   |                    |

**Table 7: Multivariate analysis of the association between sociodemographic correlates and malnutrition, Nigeria**

| Variable                     | Underweight<br>(BMI<18.50)     | Overweight<br>(BMI=25-29.99) | Obesity<br>(BMI>=30)        |
|------------------------------|--------------------------------|------------------------------|-----------------------------|
| Women's Education (in years) | -0.042***<br>(-0.067 - -0.018) | 0.034***<br>(0.019 - 0.049)  | 0.048***<br>(0.028 - 0.068) |
| Women's Age (in years)       | -0.019**<br>(-0.035 - -0.0021) | 0.040***<br>(0.030 - 0.051)  | 0.072***<br>(0.056 - 0.088) |

**Household wealth index**

Poorest (reference)

|                                              |                                |                                |                                 |
|----------------------------------------------|--------------------------------|--------------------------------|---------------------------------|
| Poorer                                       | -0.200**<br>(-0.366 - -0.034)  | 0.289***<br>(0.090 - 0.488)    | 0.208<br>(-0.280 - 0.697)       |
| Middle                                       | -0.291**<br>(-0.517 - -0.0650) | 0.691***<br>(0.479 - 0.903)    | 0.788*<br>(0.298 - 1.278)       |
| Rich                                         | -0.208<br>(-0.477 - 0.0614)    | 0.998*<br>(0.764 - 1.232)      | 1.196*<br>(0.694 - 1.698)       |
| Richest                                      | -0.530***<br>(-0.921 - -0.139) | 1.351***<br>(1.074 - 1.628)    | 1.862***<br>(1.353 - 2.372)     |
| Woman currently working (yes)                | -0.0518<br>(-0.198 - 0.0944)   | 0.0231<br>(-0.102 - 0.148)     | -0.292***<br>(-0.497 - -0.0878) |
| Place of residence (urban)                   | 0.166<br>(-0.0500 - 0.381)     | 0.0775<br>(-0.0643 - 0.219)    | 0.178*<br>(-0.0244 - 0.379)     |
| Sex of household head (female)               | -0.0836<br>(-0.336 - 0.169)    | 0.0127<br>(-0.149 - 0.174)     | -0.084<br>(-0.300 - 0.133)      |
| Parity                                       | -0.011<br>(-0.0538 - 0.0313)   | 0.039**<br>(0.009 - 0.0698)    | 0.0230<br>(-0.021 - 0.067)      |
| Household size                               | 0.007<br>(-0.015 - 0.029)      | -0.009<br>(-0.025 - 0.00654)   | 0.023*<br>(-0.002 - 0.047)      |
| <b>Frequency of watching TV</b>              |                                |                                |                                 |
| Not at all (reference)                       |                                |                                |                                 |
| Less than once a week                        | -0.146<br>(-0.336 - 0.045)     | 0.0771<br>(-0.056 - 0.210)     | 0.0585<br>(-0.162 - 0.278)      |
| At least once a week                         | -0.252***<br>(-0.438 - -0.066) | 0.155**<br>(0.024 - 0.285)     | 0.205*<br>(-0.009 - 0.420)      |
| Currently breastfeeding                      | 0.178***<br>(0.043 - 0.314)    | -0.176***<br>(-0.278 - -0.073) | -0.363***<br>(-0.524 - -0.202)  |
| <b>Marital status</b>                        |                                |                                |                                 |
| Never in union                               |                                |                                |                                 |
| Married or Cohabiting                        | -0.177<br>(-0.652 - 0.299)     | 0.633*<br>(0.188 - 1.078)      | 0.557*<br>(-0.090 - 1.204)      |
| Formerly in union                            | 0.0721<br>(-0.400 - 0.545)     | 0.921*<br>(0.426 - 1.416)      | 1.071*<br>(0.417 - 1.724)       |
| <b>Decision on large household purchases</b> |                                |                                |                                 |
| Respondent alone                             |                                |                                |                                 |
| Both Respondent and partner                  | -0.206<br>(-0.641 - 0.230)     | 0.0218<br>(-0.209 - 0.252)     | 0.341*<br>(-0.002 - 0.684)      |
| Partner alone                                | -0.181<br>(-0.579 - 0.218)     | -0.015<br>(-0.238 - 0.209)     | -0.177<br>(-0.538 - 0.184)      |
| Someone else/Other                           | 1.314*<br>(-0.239 - 2.866)     | -0.651<br>(-1.912 - 0.609)     | -0.225<br>(-1.731 - 1.281)      |
| <b>Decision on respondent's health</b>       |                                |                                |                                 |
| Respondent alone (reference)                 |                                |                                |                                 |
| Both Respondent and partner                  | -0.0847<br>(-0.525 - 0.356)    | -0.0141<br>(-0.251 - 0.223)    | -0.192<br>(-0.547 - 0.163)      |
| Partner alone                                | 0.069<br>(-0.334 - 0.474)      | 0.025<br>(-0.206 - 0.256)      | -0.088<br>(-0.460 - 0.283)      |

|                                                                            |                                |                               |                               |
|----------------------------------------------------------------------------|--------------------------------|-------------------------------|-------------------------------|
| Someone else/Other                                                         | -2.381***<br>(-1.417 - -0.423) | -1.369**<br>(-4.688 - -3.669) | -2.604**<br>(-7.160 - -5.311) |
| Observations                                                               | 31,170                         | 31,170                        | 31,170                        |
| Confidence Intervals (CI) in parentheses<br>*** p<0.01, ** p<0.05, * p<0.1 |                                |                               |                               |

The figures 1 and 2 are pictorial presentations of the probability of women falling into underweight, overweight and obese categories if there were changes in their age and years of education.

**Figure 1: Graphical Illustration of the results of the probability of falling into the DBM categories when years of education increase**

**Figure 2: Graphical Illustration of results of the probability of falling into the DBM categories when age increases**

**Discussion**

This study investigated the correlates of DBM among women in five SSA countries. The key indicators of DBM used in the analysis were, underweight, overweight and obesity. The results showed expectedly that there are some variations across countries on how the correlates included in this study are associated with DBM. Our analysis reveals that in Ghana, Mozambique and Nigeria, number of years of formal education was associated significantly and positively with overweight and obesity. Suggesting that compared to normal weight women, a higher number of years in education is associated with the likelihood of overweight and obesity in women. In effect, education tends to be a risk factor for women with unhealthy weight. This could be due to lifestyles changes as one achieve more years of education, which may include sedentary lifestyles and

1  
2  
3 dietary patterns (30). Further, it could be that people who are already overweight or obese have  
4  
5 higher propensity of adding more weight relative to those who have normal weight. Contrariwise,  
6  
7 there was an inverse relationship between number of years of formal education and underweight  
8  
9 in Kenya and Nigeria. These findings are in line with previous studies. In Ghana, higher education  
10  
11 was associated with overweight and obesity among women (31). Additionally, education was  
12  
13 found to associate positively with overweight among women in Indonesia (32). However, in the  
14  
15 same study, high education was associated with reduced risk of being underweight by 10–30%  
16  
17 (32). This is contrary to our findings in Kenya and Nigeria.  
18  
19  
20  
21  
22  
23  
24  
25

26 Furthermore, age was associated positively with all the DBM indicators across the five countries.  
27  
28 Thus, older women are more likely to be overweight and obese and less likely to be underweight.  
29  
30 This suggests that old age is a protective factor for underweight, while a risk factor for overweight  
31  
32 and obesity. This positive correlation between age and overweight and obesity, may have a  
33  
34 consequential effect on non-communicable diseases (NCDs) among older people, as an unhealthy  
35  
36 weight is a major risk factor for NCDs (33-36). An exception to these findings could be made of  
37  
38 Nigeria where older age was associated negatively with underweight women. This implies that in  
39  
40 this setting, the older women become the more likelihood that they will suffer from underweight.  
41  
42 The consequential effect of this may be poor health outcomes, especially for women of  
43  
44 reproductive age. The reason is that being underweight exposes women to higher risks of  
45  
46 morbidity and mortality during pregnancy and child birth (37-39). The relationship between age  
47  
48 and DBM has been documented in previous studies. For example, Doku and Neupane observed a  
49  
50 significant positive association between age and the key indicators of DBM in Ghana (31). A study  
51  
52  
53  
54  
55  
56  
57  
58  
59  
60



1  
2  
3 in Bangladesh observed a significant positive relationship between older age and DBM (40). These  
4  
5 findings together with the findings from our study confirmed the contribution of age to the DBM  
6  
7 epidemic.  
8  
9

10  
11  
12  
13  
14 Our analysis showed that household wealth index had mixed effects on DBM. In general, the three  
15  
16 rich quintiles: middle, richer and richest were associated significantly and positively with  
17  
18 overweight and obesity among women across all the countries included in the analysis. This may  
19  
20 be due to obesogenic effects of increased household wealth as dietary pattern changes (41), and  
21  
22 the fact that there is a documented positive correlation between household wealth and unhealthy  
23  
24 body weight (42, 43). In Bangladesh and Nepal, higher household wealth was associated with an  
25  
26 increased likelihood of being overweight and obese (42). Also, being rich was associated with  
27  
28 overweight and obesity among Ghanaian women (31). Interestingly, higher household wealth had  
29  
30 an inverse effect on underweight. This inverse relationship may be due to the fact that most  
31  
32 underweight women are likely to be in the poorer wealth quintiles (44) and therefore, may be  
33  
34 unaffected by the higher household wealth quintiles. The inverse relationship has been observed  
35  
36 previously (45). Relatedly, compared to the richest, women from the poorest households were  
37  
38 significantly most likely to be underweight and least likely to be overweight over normal weight in  
39  
40 Bangladesh (17). Suggesting that being in the poorest household is protective against overweight  
41  
42 but not underweight (44).  
43  
44  
45  
46  
47  
48  
49  
50  
51  
52  
53  
54  
55  
56  
57  
58  
59  
60

1  
2  
3 The health benefits of breastfeeding were illuminated in this study. Breastfeeding was found to  
4  
5 associate with less likelihood of underweight, overweight and obesity in the five countries  
6  
7 analysed. This suggests that mothers who have unhealthy weight should be encourage to practice  
8  
9 breastfeeding as the benefits are not only to their offspring but also for their own health and  
10  
11 wellbeing. These findings confirm the widely recognized benefits of breastfeeding for improved  
12  
13 health and developmental outcomes in mothers and their infants (46-49). The implication of this  
14  
15 may be that interventions to promote breastfeeding may have positive impact on the DBM  
16  
17 epidemic at the national level. The benefits of breastfeeding to women health have previously  
18  
19 been documented. For example, breastfeeding has been suggested as an efficient means of  
20  
21 promoting postpartum weight loss due to its high energy cost (50). Further evidence suggest that  
22  
23 at 12 weeks postpartum, exclusively breastfeeding (EBF) mothers had lost more total body weight  
24  
25 than mixed feeding mothers. However, mixed feeding mothers lost slightly more percent body fat  
26  
27 than exclusively breastfeeding mothers (50).The authors concluded that EBF promotes greater  
28  
29 weight loss than mixed feeding among mothers even in the early postpartum period. Several other  
30  
31 studies have shown that EBF influences postpartum weight loss (49-52). The preceding discussion  
32  
33 points to the need for health policy makers to design programmes to encourage mothers to  
34  
35 breastfeed, especially, practice exclusive breastfeeding as a means of DBM prevention.  
36  
37  
38  
39  
40  
41  
42  
43  
44  
45  
46  
47

48 An important strength of our study is the use of large nationally representative samples, thereby  
49  
50 providing more robust estimates of observed associations as well as enhancing the generalizability  
51  
52 of the findings. The use of multi-country data help unmask differences and commonalities in the  
53  
54 effects of the correlates on DBM across countries, which would not have been possible with single  
55  
56  
57

1  
2  
3 country data. Additionally, the height and weight data which were used to compute the BMI were  
4  
5 objectively measured, reducing possible misclassification. A limitation worth mentioning is the  
6  
7 cross-sectional nature of the data, which does not lend itself to the establishments of causal  
8  
9 relationship between the predictor and outcome variables. The conclusions in the paper are  
10  
11 therefore interpreted as mere associations between the predictor variables and the outcome  
12  
13 variable. Another limitation is that due to data limitation, we were not able to examine DBM at the  
14  
15 individual and within households. The analysis and interpretation in this paper are therefore  
16  
17 limited to DBM at population or national level, whereby underweight, overweight and obesity co-  
18  
19 exist in the same country.  
20  
21  
22  
23  
24  
25  
26  
27  
28

## 29 **Conclusions**

30  
31 The study investigated the correlates of the DBM in five SSA countries. The analysis revealed that  
32  
33 the effects of the correlates on DBM are largely similar across countries, except in few cases where  
34  
35 there were disparities in the effects. The results indicate that higher number of years of education  
36  
37 increases the likelihood of overweight and obesity among women in Ghana, Mozambique and  
38  
39 Nigeria. Conversely, number of years of education is associated negatively with underweight in  
40  
41 Kenya and Nigeria. Living in better-off households increases significantly the likelihood of  
42  
43 overweight and obesity among women across all countries, while associated with the likelihood of  
44  
45 underweight. Interventions to address DBM should take into account socioeconomic status. This  
46  
47 may include providing special programmes for women who have unhealthy weight in wealthy  
48  
49 households. Old age is also associated significantly and positively with underweight, overweight  
50  
51 and obesity in all the countries included in the analysis. Breastfeeding is associated with least  
52  
53  
54  
55  
56  
57  
58  
59  
60

1  
2  
3 likelihood of underweight, overweight and obesity in breastfeeding mothers. This implies that  
4  
5 interventions to prevent DBM should incorporate breastfeeding to enhance their effectiveness.  
6  
7  
8  
9  
10  
11  
12  
13

#### 14 **Acknowledgements**

15  
16  
17 We wish to express our profound gratitude to The DHS Program, USA for providing us access to  
18  
19 the data. We also wish to acknowledge institutions of respective countries that played critical  
20  
21 roles in the data collection process.  
22  
23  
24  
25  
26  
27  
28

#### 29 **Competing Interest**

30  
31  
32 The authors have no competing interests to declare.  
33  
34

#### 35 **Funding**

36  
37  
38 This study did not receive funding from any source.  
39  
40

#### 41 **Data Sharing Statement**

42  
43  
44 This study was a re-analysis of existing data that are publicly available from The DHS Program at  
45  
46 <http://dhsprogram.com/publications/publication-fr221-dhs-final-reports.cfm>. Data are accessible  
47  
48 free of charge upon a registration with the Demographic and Health Survey program (The DHS  
49  
50 Program). The registration is done on the DHS website indicated above.  
51  
52  
53

#### 54 **Authors' Contribution**

1  
2  
3 DAA conceived and designed the study. DAA and ZTD conducted the data analysis, interpreted  
4  
5 the results and drafted the manuscript. CK contributed to study design, data analysis,  
6  
7 interpretation, and critical revision of the manuscript. All authors take responsibility of any issues  
8  
9 that might arise from the publication of this manuscript.  
10  
11  
12  
13  
14  
15  
16  
17  
18  
19  
20

## 21 References

- 25 1. World Health Organization (2017). Double burden of malnutrition  
26 <http://www.who.int/nutrition/double-burden-malnutrition/en/> (access on August 2018)
- 27 2. Shrimpton R, Rokx C (2012). The Double Burden of Malnutrition : A Review of Global Evidence.  
28 Health, Nutrition and Population Discussion Paper;. World Bank, Washington, DC. World Bank.  
29 <https://openknowledge.worldbank.org/handle/10986/27417>.
- 30 3. NCD Risk Factor Collaboration (2016). Trends in adult body-mass index in 200 countries from 1975  
31 to 2014: a pooled analysis of 1698 population-based measurement studies with 19·2 million participants  
32 *The Lancet* 387(10026):1377-296.
- 33 4. Kolčić I (2012). Double burden of malnutrition: A silent driver of double burden of disease in low-  
34 and middle-income countries. *J Glo Health* 2(2):020303.
- 35 5. World Health Organization (2011). Global Status Report on Non-communicable diseases 2010.  
36 Geneva: WHO.
- 37 6. Amugsi DA, Dimbuene ZT, Mberu B, et al (2017). Prevalence and time trends in overweight and  
38 obesity among urban women: an analysis of demographic and health surveys data from 24 African  
39 countries, 1991–2014. *BMJ Open* 7, :e017344.
- 40 7. Mendez MA, Monteiro CA, Popkin BM (2005). Overweight Exceeds Underweight Among Women  
41 in Most Developing Countries *Am J Clin Nutr* 81, 714-21.
- 42 8. Delisle H (2008). Poverty. The Double Burden of Malnutrition in Mothers and the  
43 Intergenerational Impact. *Ann NY Acad Sci* 1136, 172-84.
- 44 9. World Health Organization (2002). World Health Report 2002. Reducing risks, promoting healthy  
45 life. Geneva. .
- 46 10. World Health Organization (2009). Global health risks: mortality and burden of disease  
47 attributable to selected major risks  
48 [http://www.who.int/healthinfo/global\\_burden\\_disease/GlobalHealthRisks\\_report\\_full.pdf](http://www.who.int/healthinfo/global_burden_disease/GlobalHealthRisks_report_full.pdf) (access July  
49 2018).
- 50 11. Delisle H (2005). Early nutritional influences on obesity, diabetes and cardiovascular disease risk.  
51 International Workshop, 6-9 June 2004, Montreal University, Quebec, Canada. *Matern Child Nutr*  
52 1(3):128-9.

12. World Health Organization (2018). Urgent action needed to tackle the double burden of malnutrition and to achieve Universal Health Coverage and Sustainable Development Goals in Africa <https://www.afro.who.int/news/urgent-action-needed-tackle-double-burden-malnutrition-and-achieve-universal-health-coverage> (access July 2018).
13. Kennedy G, Nantel G, Shetty P (2006). Assessment of the double burden of malnutrition in six case study countries <http://www.fao.org/docrep/009/a0442e/a0442e03.htm#TopOfPage> (access July 2018).
14. Hasan M, Sutradhar I, Shahabuddin A, Sarker M (2017). Double Burden of Malnutrition among Bangladeshi Women: A Literature Review. Muacevic A, Adler JR, eds. *Cureus* 9(12).
15. Sarma H, Saquib N, Hasan MM et al (2016). Determinants of overweight or obesity among ever-married adult women in Bangladesh. *BMC obesity* 3, 13.
16. Zeba AN, Delisle HF, Renier G et al (2012). The double burden of malnutrition and cardiometabolic risk widens the gender and socio-economic health gap: a study among adults in Burkina Faso (West Africa). *Public Health Nutr* 15(12):2210-9.
17. Kamal SM, Hassan CH, Alam GM (2015). Dual burden of underweight and overweight among women in Bangladesh: patterns, prevalence, and sociodemographic correlates. *J Health Popul Nutr* 33, 92-105.
18. Kimani-Murage EW, Muthuri SK, Oti SO (2015). Evidence of a Double Burden of Malnutrition in Urban Poor Settings in Nairobi, Kenya. *PLoS One* 10, :e0129943.
19. The DHS Program (2018). Demographic and Health Surveys <http://dhsprogram.com/data/available-datasets.cfm> (access August 2018).
20. The DHS Program (2018). Demographic and Health Surveys [https://dhsprogram.com/data/dataset\\_admin/download-datasets.cfm](https://dhsprogram.com/data/dataset_admin/download-datasets.cfm) (access July 2018).
21. The DHS Program (2018). DHS Methodology. <http://dhsprogram.com/What-We-Do/Survey-Types/DHS-Methodology.cfm> (access July 2018).
22. Ghana Statistical Service (GSS), Ghana Health Service (GHS), ICF Macro (2009). Ghana Demographic and Health Survey 2008 Accra, Ghana: GSS, GHS, and ICF Macro
23. Ministry of Health and Social Services (MoHSS), Macro International Inc (2008). Namibia Demographic and Health Survey 2006-07 Windhoek, Namibia and Calverton, Maryland, USA: MoHSS and Macro International Inc.
24. Ghana Statistical Service (GSS), Ghana Health Service (GHS), ICF International (2015). Ghana Demographic and Health Survey 2014. Rockville, Maryland, USA: GSS, GHS, and ICF International.
25. National Population Commission (NPC) [Nigeria], ICF International (2014). Nigeria Demographic and Health Survey 2013. Abuja, Nigeria, and Rockville, Maryland, USA: NPC and ICF International.
26. National Bureau of Statistics-Kenya, ICF International (2015). 2014 KDHS Key Findings. Rockville, Maryland, USA: KNBS and ICF International.
27. Eknoyan G, Adolphe Quetelet (1796 –1874) (2008) - the average man and indices of obesity . *Nephrol Dial Transplant* 23,47-51.
28. World Health Organization (2006). BMI classification: WHO [http://apps.who.int/bmi/index.jsp?introPage=intro\\_3.html](http://apps.who.int/bmi/index.jsp?introPage=intro_3.html) (access August 2018).
29. Starkweather J, Moske KA (2011). Multinomial Logistic Regression [https://it.unt.edu/sites/default/files/mlr\\_jds\\_aug2011.pdf](https://it.unt.edu/sites/default/files/mlr_jds_aug2011.pdf) (access August 2018).
30. Kautzky-Willer A, Dorner T, Jensby A, Rieder A (2012). Women show a closer association between educational level and hypertension or diabetes mellitus than males: a secondary analysis from the Austrian HIS. *BMC Public Health* 12, 392
31. Doku DT, Neupane S (2015). Double burden of malnutrition: increasing overweight and obesity and stall underweight trends among Ghanaian women. *BMC Public Health* 15, 670.

- 1  
2  
3 32. Hanandita W, Tampubolon G (2015). The double burden of malnutrition in Indonesia: Social  
4 determinants and geographical variations. *SSM - Population Health* 1, 16-25.
- 5 33. Kunutsor S, Powles J (2009). Descriptive epidemiology of blood pressure in a rural adult  
6 population in Northern Ghana *Rural Remote Health* 9,1095.
- 7 34. Agyemang C (2006). Rural and urban differences in blood pressure and hypertension in Ghana,  
8 West Africa *Public Health* 120(6):525-33.
- 9 35. Van Middendorp D, Asbroek A, Bio FY et al (2013). Rural and urban differences in blood pressure  
10 and pregnancy-induced hypertension among pregnant women in Ghana *Global Health* 9, 59
- 11 36. Nichols SR, Elliott P (1996). Hypertension. In: Murray CJL, Lopez AD, editors. *Quantifying Global*  
12 *Health Risks: the Burden of Disease Attributable to Selected Risk Factors*. Cambridge, Massachusetts:  
13 Harvard University Press
- 14 37. Negoro H, Sugino Y, Nishizawa K et al (2015). Underweight body mass index is a risk factor of  
15 mortality in outpatients with nocturia in Japan. *BMC Research Notes* 8, 490.
- 16 38. Park D, Lee J-H, Han S (2017). Underweight: another risk factor for cardiovascular disease? A cross-  
17 sectional 2013 Behavioral Risk Factor Surveillance System (BRFSS) study of 491,773 individuals in the USA.  
18 *Medicine* 96, e8769.
- 19 39. Victora CG, Adair L, Fall C, et al (2008). Maternal and child undernutrition: consequences for adult  
20 health and human capital. *Lancet* 371(9609):340-57.
- 21 40. Oddo V, H Rah J, D Semba R et al (2012). Predictors of maternal and child double burden of  
22 malnutrition in rural Indonesia and Bangladesh *Am J Clin Nutr* 95(4):951-8 .
- 23 41. Aitsi-Selmi A, Bell R, Shipley MJ, Marmot MG (2014). Education Modifies the Association of  
24 Wealth with Obesity in Women in Middle-Income but Not Low-Income Countries: An Interaction Study  
25 Using Seven National Datasets, 2005-2010. *PloS One* 9, e90403.
- 26 42. Bishwajit G (2017). Household wealth status and overweight and obesity among adult women in  
27 Bangladesh and Nepal. *Obesity science & practice* 3(2):185-92.
- 28 43. Balarajan Y, Villamor E (2009). Nationally representative surveys show recent increases in the  
29 prevalence of overweight and obesity among women of reproductive age in Bangladesh, Nepal, and India.  
30 *J Nutr* 139(11):2139-44.
- 31 44. Tebekaw Y, Teller C, Colon-Ramos U (2014). The burden of underweight and overweight among  
32 women in Addis Ababa, Ethiopia. *BMC Public Health*, 14, 1126.
- 33 45. Selvamani Y, Singh P (2018). Socioeconomic patterns of underweight and its association with self-  
34 rated health, cognition and quality of life among older adults in India. *PloS One* 13, e0193979.
- 35 46. Jonas W, Nissen E, Ransjö-Arvidson AB et al (2008). Short- and long-term decrease of blood  
36 pressure in women during breastfeeding *Breastfeed Med* 3(2):103-9.
- 37 47. Handlin L, Jonas W, Ransjö-Arvidson AB et al (2012). Influence of common birth interventions on  
38 maternal blood pressure patterns during breastfeeding 2 days after birth *Breastfeed Med* 7(2):93-9.
- 39 48. Stuebe AM, Schwarz EB, Grewen K et al (2011). Duration of Lactation and Incidence of Maternal  
40 Hypertension: A Longitudinal Cohort Study. *Am J Epidemiol* 174(10):1147-58.
- 41 49. Samano R, Martinez-Rojano H, Godinez Martinez E et al (2013). Effects of breastfeeding on weight  
42 loss and recovery of pregestational weight in adolescent and adult mothers. *Food Nutr Bull* 34(2):123-30.
- 43 50. Hatsu IE, McDougald DM, Anderson AK (2008). Effect of infant feeding on maternal body  
44 composition. *Int Breastfeed J* 3, 18.
- 45 51. Lopez-Olmedo N, Hernandez-Cordero S et al (2016). The Associations of Maternal Weight Change  
46 with Breastfeeding, Diet and Physical Activity During the Postpartum Period. *Matern Child Health J*  
47 20(2):270-80.
- 48 52. Schalla SC, Witcomb GL, Haycraft E (2017). Body Shape and Weight Loss as Motivators for  
49 Breastfeeding Initiation and Continuation. *Int J Environ Res Public Health* 14 (7).
- 50  
51  
52  
53  
54  
55  
56  
57  
58  
59  
60

1  
2  
3  
4  
5  
6  
7  
8  
9  
10  
11  
12  
13  
14  
15  
16  
17  
18  
19  
20  
21  
22  
23  
24  
25  
26  
27  
28  
29  
30  
31  
32  
33  
34  
35  
36  
37  
38  
39  
40  
41  
42  
43  
44  
45  
46  
47  
48  
49  
50  
51  
52  
53  
54  
55  
56  
57  
58  
59  
60

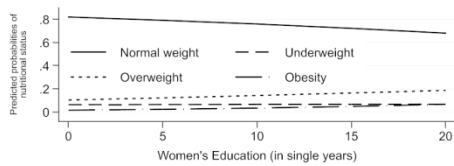

Source: 2013-2014 DHS D.R. Congo

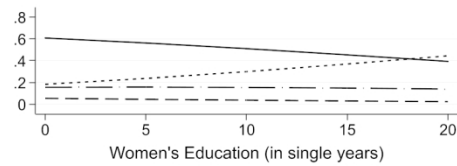

Source: 2014 DHS Ghana

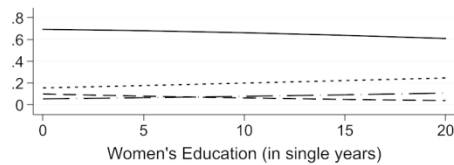

Source: 2013 DHS Nigeria

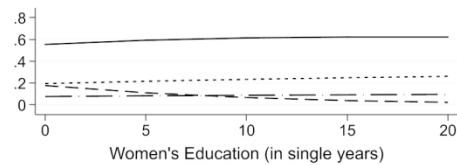

Source: 2014 DHS Kenya

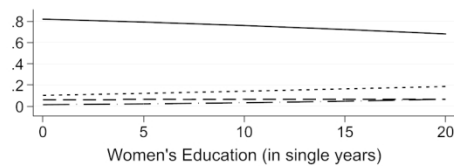

Source: 2011 DHS Mozambique

152x101mm (300 x 300 DPI)



1  
2  
3  
4  
5  
6  
7  
8  
9  
10  
11  
12  
13  
14  
15  
16  
17  
18  
19  
20  
21  
22  
23  
24  
25  
26  
27  
28  
29  
30  
31  
32  
33  
34  
35  
36  
37  
38  
39  
40  
41  
42  
43  
44  
45  
46  
47  
48  
49  
50  
51  
52  
53  
54  
55  
56  
57  
58  
59  
60

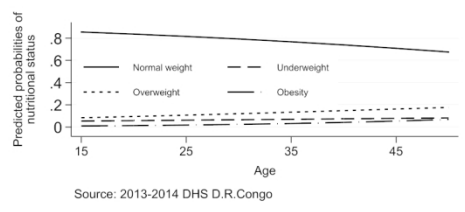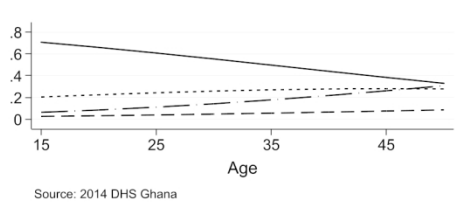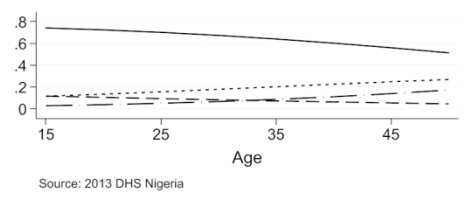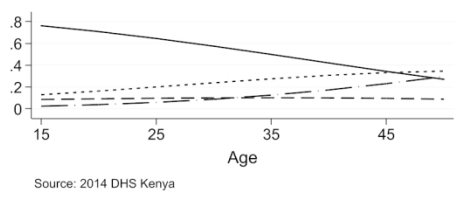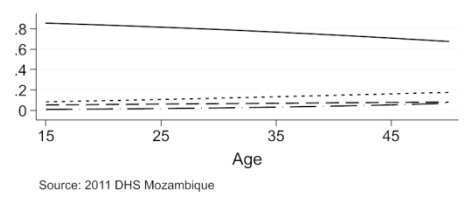

152x101mm (300 x 300 DPI)

**STROBE 2007 (v4) Statement—Checklist of items that should be included in reports of *cross-sectional studies***

| Section/Topic                | Item # | Recommendation                                                                                                                                                                       | Reported on page # |
|------------------------------|--------|--------------------------------------------------------------------------------------------------------------------------------------------------------------------------------------|--------------------|
| <b>Title and abstract</b>    | 1      | (a) Indicate the study's design with a commonly used term in the title or the abstract                                                                                               | 1                  |
|                              |        | (b) Provide in the abstract an informative and balanced summary of what was done and what was found                                                                                  | 2                  |
| <b>Introduction</b>          |        |                                                                                                                                                                                      |                    |
| Background/rationale         | 2      | Explain the scientific background and rationale for the investigation being reported                                                                                                 | 4-6-               |
| Objectives                   | 3      | State specific objectives, including any prespecified hypotheses                                                                                                                     | 7                  |
| <b>Methods</b>               |        |                                                                                                                                                                                      |                    |
| Study design                 | 4      | Present key elements of study design early in the paper                                                                                                                              | 7-8                |
| Setting                      | 5      | Describe the setting, locations, and relevant dates, including periods of recruitment, exposure, follow-up, and data collection                                                      | 7-9                |
| Participants                 | 6      | (a) Give the eligibility criteria, and the sources and methods of selection of participants                                                                                          | 8                  |
| Variables                    | 7      | Clearly define all outcomes, exposures, predictors, potential confounders, and effect modifiers. Give diagnostic criteria, if applicable                                             | 8-9                |
| Data sources/<br>measurement | 8*     | For each variable of interest, give sources of data and details of methods of assessment (measurement). Describe comparability of assessment methods if there is more than one group | 8-9                |
| Bias                         | 9      | Describe any efforts to address potential sources of bias                                                                                                                            |                    |
| Study size                   | 10     | Explain how the study size was arrived at                                                                                                                                            |                    |
| Quantitative variables       | 11     | Explain how quantitative variables were handled in the analyses. If applicable, describe which groupings were chosen and why                                                         | 9-10               |
| Statistical methods          | 12     | (a) Describe all statistical methods, including those used to control for confounding                                                                                                | 9-10               |
|                              |        | (b) Describe any methods used to examine subgroups and interactions                                                                                                                  | 9-10               |
|                              |        | (c) Explain how missing data were addressed                                                                                                                                          | 9-10               |
|                              |        | (d) If applicable, describe analytical methods taking account of sampling strategy                                                                                                   |                    |
|                              |        | (e) Describe any sensitivity analyses                                                                                                                                                | NA                 |
| <b>Results</b>               |        |                                                                                                                                                                                      |                    |

|                          |     |                                                                                                                                                                                                              |       |
|--------------------------|-----|--------------------------------------------------------------------------------------------------------------------------------------------------------------------------------------------------------------|-------|
| Participants             | 13* | (a) Report numbers of individuals at each stage of study—eg numbers potentially eligible, examined for eligibility, confirmed eligible, included in the study, completing follow-up, and analysed            | 8     |
|                          |     | (b) Give reasons for non-participation at each stage                                                                                                                                                         | 8     |
|                          |     | (c) Consider use of a flow diagram                                                                                                                                                                           | NA    |
| Descriptive data         | 14* | (a) Give characteristics of study participants (eg demographic, clinical, social) and information on exposures and potential confounders                                                                     | 11-12 |
|                          |     | (b) Indicate number of participants with missing data for each variable of interest                                                                                                                          | NA    |
| Outcome data             | 15* | Report numbers of outcome events or summary measures                                                                                                                                                         | NA    |
| Main results             | 16  | (a) Give unadjusted estimates and, if applicable, confounder-adjusted estimates and their precision (eg, 95% confidence interval). Make clear which confounders were adjusted for and why they were included | 9-10  |
|                          |     | (b) Report category boundaries when continuous variables were categorized                                                                                                                                    | 10    |
|                          |     | (c) If relevant, consider translating estimates of relative risk into absolute risk for a meaningful time period                                                                                             | NA    |
| Other analyses           | 17  | Report other analyses done—eg analyses of subgroups and interactions, and sensitivity analyses                                                                                                               | NA    |
| <b>Discussion</b>        |     |                                                                                                                                                                                                              |       |
| Key results              | 18  | Summarise key results with reference to study objectives                                                                                                                                                     | 21    |
| Limitations              | 19  | Discuss limitations of the study, taking into account sources of potential bias or imprecision. Discuss both direction and magnitude of any potential bias                                                   | 24    |
| Interpretation           | 20  | Give a cautious overall interpretation of results considering objectives, limitations, multiplicity of analyses, results from similar studies, and other relevant evidence                                   | 21-24 |
| Generalisability         | 21  | Discuss the generalisability (external validity) of the study results                                                                                                                                        | 25    |
| <b>Other information</b> |     |                                                                                                                                                                                                              |       |
| Funding                  | 22  | Give the source of funding and the role of the funders for the present study and, if applicable, for the original study on which the present article is based                                                | NA    |

\*Give information separately for cases and controls in case-control studies and, if applicable, for exposed and unexposed groups in cohort and cross-sectional studies.

**Note:** An Explanation and Elaboration article discusses each checklist item and gives methodological background and published examples of transparent reporting. The STROBE checklist is best used in conjunction with this article (freely available on the Web sites of PLoS Medicine at <http://www.plosmedicine.org/>, Annals of Internal Medicine at <http://www.annals.org/>, and Epidemiology at <http://www.epidem.com/>). Information on the STROBE Initiative is available at [www.strobe-statement.org](http://www.strobe-statement.org).

# BMJ Open

## Correlates of the double burden of malnutrition among women: an analysis of cross sectional survey data from sub-Saharan Africa

|                                 |                                                                                                                                                                                                                                                       |
|---------------------------------|-------------------------------------------------------------------------------------------------------------------------------------------------------------------------------------------------------------------------------------------------------|
| Journal:                        | <i>BMJ Open</i>                                                                                                                                                                                                                                       |
| Manuscript ID                   | bmjopen-2019-029545.R1                                                                                                                                                                                                                                |
| Article Type:                   | Research                                                                                                                                                                                                                                              |
| Date Submitted by the Author:   | 12-Apr-2019                                                                                                                                                                                                                                           |
| Complete List of Authors:       | Amugsi, Dickson; African Population and Health Research Center, Urbanization and Wellbeing<br>DIMBUENE, ZACHARIE; University of Kinshasa, Population Sciences and Development<br>Kyobutungi, Catherine; African Population and Health Research Center |
| <b>Primary Subject Heading</b>: | Epidemiology                                                                                                                                                                                                                                          |
| Secondary Subject Heading:      | Nutrition and metabolism, Public health                                                                                                                                                                                                               |
| Keywords:                       | EPIDEMIOLOGY, Nutrition < TROPICAL MEDICINE, PUBLIC HEALTH                                                                                                                                                                                            |
|                                 |                                                                                                                                                                                                                                                       |

SCHOLARONE™  
Manuscripts

1  
2  
3 **Correlates of the double burden of malnutrition among women: an analysis of cross sectional**  
4 **survey data from sub-Saharan Africa**  
5

6 Dickson A. Amugsi<sup>1\*</sup>

7  
8 [damugsi2002@yahoo.com](mailto:damugsi2002@yahoo.com); [damugsi@aphrc.org](mailto:damugsi@aphrc.org)  
9

10 Zacharie T. Dimbuene<sup>2, 3</sup>

11  
12 [zacharie.tsala.dimbuene@gmail.com](mailto:zacharie.tsala.dimbuene@gmail.com)  
13

14 Catherine Kyobutungi<sup>1</sup>

15  
16 [ckyobutungi@aphrc.org](mailto:ckyobutungi@aphrc.org)  
17  
18  
19

20 1. African Population and Health Research Center, APHRC Campus, P.O Box 10787-00100,  
21 Nairobi, Kenya  
22

23 2. Department of Population Sciences and Development, University of Kinshasa, Democratic  
24 Republic of the Congo  
25

26 3. Statistics Canada, Social Analysis and Modeling Division, Ottawa, Canada K1A 0T6  
27  
28  
29

30 \* Corresponding author: Dr Dickson A. Amugsi

31  
32 Email: [damugsi2002@yahoo.com](mailto:damugsi2002@yahoo.com); [damugsi@aphrc.org](mailto:damugsi@aphrc.org)  
33  
34  
35

36 Word count: 3725  
37  
38  
39  
40  
41  
42  
43  
44  
45  
46  
47  
48  
49  
50  
51  
52  
53  
54  
55  
56  
57  
58  
59  
60

## Abstract

**Objective:** To investigate the correlates of the double burden of malnutrition (DBM) among women in five sub-Saharan African countries

**Design:** Secondary analysis of Demographic and Health Surveys (DHS). The outcome variable was body mass index (BMI), a measure of DBM. The BMI was classified into underweight (BMI<18.50 kg/m<sup>2</sup>), normal weight (18.50-24.99 kg/m<sup>2</sup>), overweight (25.0-29.9 kg/m<sup>2</sup>) and obesity ( $\geq$  30.0 kg/m<sup>2</sup>).

**Settings:** Ghana, Nigeria, Kenya, Mozambique and Democratic Republic of Congo (DRC).

**Subjects:** Women aged 15-49 years (*n* 64,698).

**Results:** Compared with normal weight women, number of years of formal education was associated with the likelihood of being overweight and obese in Ghana, Mozambique and Nigeria, while associated with the likelihood of being underweight in Kenya and Nigeria. Older age was associated with the likelihood of being underweight, overweight and obese in all countries. Positive associations were also observed between living in better-off households, and overweight and obesity, while a negative association was observed for underweight. Breastfeeding was associated with less likelihood of underweight in DRC and Nigeria, obesity in DRC and Ghana, overweight in Kenya, and overweight and obesity in Mozambique and Nigeria relative to normal weight.

**Conclusions:** Our analysis reveals that in all the countries, women who are breastfeeding are less likely to be underweight, overweight and obese. Education, age and household wealth index tend to associate with a higher likelihood of DBM among women. Interventions to address DBM should take into account the variations in the effects of these correlates.

**Keyword:** Double burden, malnutrition, women, correlates, sub-Saharan Africa

### Strengths and limitations of this study

- Large nationally representative samples used, thereby providing more robust estimates of observed associations
- The height and weight data used to compute the BMI were objectively measured, reducing possible misclassification
- Use of multi-country data helped unmask differences and commonalities in the effects of the correlates on DBM across countries
- The use of cross-sectional surveys may not allow to establish causation
- Due to data limitation, the DBM was examined only at the population or national level

## Introduction

The Double Burden of Malnutrition (DBM), which is the coexistence of both undernutrition and over-nutrition in the same population across the life course is a global public health problem (1, 2). Data from the World Health Organization (WHO) indicate that in 2014, 1.9 billion adults aged 18 years and above were overweight, while over 600 million were obese globally (1). Similarly, in the same year, 462 million adults were underweight and 264 million women of reproductive age were affected by iron-amenable anaemia (2, 3). These key indicators of DBM are also increasing globally, with the low and middle income countries (LMICs) being the most affected (4). For example, while globally, obesity has doubled in the last three decades, it has tripled in LMICs in just two decades (5). An analysis of survey data from 24 African countries spanning 25 years, revealed that overweight and obesity among women are on the rise (6). Also, comparative analysis of data on women and men in the developing countries showed that DBM tends to disproportionately affect women than men (7, 8). The vulnerability of women to DBM may be attributed to their high nutritional requirements for pregnancy and lactation and also because of gender inequalities in poverty (8). Further evidence suggests that if micronutrient deficiencies are taken into account, Africa is in fact experiencing a triple burden of malnutrition (2, 3). It has been estimated that almost 50 percent of pregnant women in Africa suffer from anaemia, which increases the risk of death for themselves as well as their unborn babies (2).

Furthermore, the contribution of DBM to the burden of disease has been documented. The available evidence suggests that underweight and obesity are among the top ten leading risk factors for the global burden of disease (9, 10). Furthermore, more recent WHO data have



1  
2  
3 identified underweight among the top four risks factors for the burden of disease in the world, as  
4  
5 measured in disability-adjusted life years (DALYs)—contributing up to 6% of global DALYs (10). The  
6  
7 relationship between maternal and child weight and the consequences on disease incidence later  
8  
9 in life have also been documented. For example, being overweight as a mother is associated with  
10  
11 overweight and obesity in their offspring (2, 11). Rapid weight gain early in life may predispose to  
12  
13 long-term excessive weight or obesity. And as the evidence suggests, obesity is an important  
14  
15 underlying cause of many non-communicable diseases (NCDs), including hypertension, diabetes,  
16  
17 cancer, stroke, and ischemic heart disease (3, 5, 11). These diseases are responsible for most of  
18  
19 the deaths worldwide, with LMICs disproportionately bearing the brunt, where 80% of the NCD  
20  
21 deaths occur (2-4). Experts warned that unless countries in Africa start enacting measures to tackle  
22  
23 the DBM affecting the continent, the road towards universal health care (UHC) will be marred with  
24  
25 obstacles as will the aspiration to achieve health and wellbeing for all by 2030 (12).  
26  
27  
28  
29  
30  
31  
32  
33  
34  
35

36 It is important to underscore that DBM can exist at the individual, household and population levels  
37  
38 (2). For instance, at the individual level, obesity can occur with deficiency of one or various vitamins  
39  
40 and minerals, or overweight in an adult who was stunted during childhood. At the household level,  
41  
42 a mother may be overweight or anaemic and a child or grandparent is underweight. DBM at the  
43  
44 population level occurs when there is a prevalence of both under- and over-nutrition in the same  
45  
46 community, nation or region (2). Since it will be difficult to determine individual and within  
47  
48 households DBM using these data, our definition of DBM is at population or country level, whereby  
49  
50 underweight and overweight/obesity co-exist in the same country. Undoubtedly, the DBM offers  
51  
52 an important opportunity for use of multidimensional approaches in tackling malnutrition in all its  
53  
54  
55  
56  
57

1  
2  
3 forms. Addressing the DBM will be key to achieving the Sustainable Development Goals (in  
4 particular Goal 2 and Target 3.4) and the Commitments of the Rome Declaration on Nutrition,  
5 within the UN Decade of Action on Nutrition (1). However, as a starting point, countries need to  
6 understand the key correlates of DBM. The present paper attempts to elucidate these correlates.  
7  
8  
9  
10  
11  
12  
13  
14  
15

16 The factors influencing DBM are complex; ranging from biological to environmental factors (2).  
17 Some of these factors may include, poor water and sanitation systems, weak public health systems  
18 thereby thwarting efforts to reduce undernutrition (2). Also, increasing urbanization and changing  
19 dietary patterns and sedentary lifestyles, income level, older age, household wealth, higher  
20 education, place of residence among others have been identified as key contributing factors to the  
21 DBM epidemic (13-16). For example, Kamal and colleagues observed in their study that household  
22 wealth index and place of residence are key predictors of the DBM among women in Bangladesh  
23 (17). Women from the poorest wealth quintile were more likely to suffer from DBM relative to  
24 those from the richest wealth quintile. Besides, marital status, age at first childbirth, parity,  
25 household size and food security were also found to play a critical role in the DBM epidemic (14,  
26 17, 18). The above referenced studies used data from a single country, masking differences and  
27 commonalities of the effects of the correlates on DBM across countries. The present study is  
28 intended to fill this gap.  
29  
30  
31  
32  
33  
34  
35  
36  
37  
38  
39  
40  
41  
42  
43  
44  
45  
46  
47  
48  
49  
50  
51

52 Given the anticipated long-term effects of DBM, the factors that are associated with being  
53 underweight, overweight or obese should be considered while formulating effective interventions  
54  
55  
56  
57

1  
2  
3 to address DBM among women (15, 16). This stresses the need for prevention strategies targeted  
4  
5 at addressing all forms of malnutrition. The present study is well positioned to provide evidence  
6  
7 on the key correlates of DBM in SSA, which is currently lacking in the region. Understanding the  
8  
9 role of these risk factors is key to developing clear and effective strategies for improving public  
10  
11 health in SSA. The overarching aim of our study is to examine the correlates of DBM among women  
12  
13 in five SSA countries.  
14  
15  
16  
17  
18  
19  
20

## 21 **Methodology**

### 22 ***Sources of data and sampling procedure***

#### 23 *Design and data sources*

24  
25  
26  
27  
28  
29  
30 The study used the recent Demographic and Health Surveys (DHS) (19) data from Ghana (2014),  
31  
32 Kenya (2014), Nigeria (2013), Mozambique (2011) and Democratic Republic of Congo (DRC) (2013-  
33  
34 2014). These are nationally representative, repeated cross-sectional household surveys collected  
35  
36 primarily in lower- and middle-income countries approximately every 5 years and standardized to  
37  
38 enable cross-country comparisons (20, 21). The design of the DHS surveys is identical across all  
39  
40 participating countries, making possible the comparisons between and across countries. The DHS  
41  
42 utilizes a two-stage sample design (22-26). The first stage involves the selection of sample points  
43  
44 or clusters from an updated master sampling frame constructed from National Population and  
45  
46 Housing Census of the respective countries. The clusters are selected using systematic sampling  
47  
48 with probability proportional to size. Household listing is then conducted in all the selected clusters  
49  
50 to provide a sampling frame for the second stage selection of households. The second stage of  
51  
52  
53  
54  
55  
56  
57  
58  
59  
60

1  
2  
3 selection involves the systematic sampling of the households listed in each cluster, and households  
4  
5 to be included in the survey are randomly selected from the list. The rationale for the second stage  
6  
7 selection is to ensure adequate numbers of completed individual interviews to provide estimates  
8  
9 for key indicators with an acceptable precision. All men and women aged 15-59 and 15-49  
10  
11 respectively, in the selected households (men in half of the households) were eligible to participate  
12  
13 in the surveys if they were either usual residents of the household or visitors present in the  
14  
15 household on the night before the survey. We limited our analyses to women aged 15–49 years in  
16  
17 all countries and who have complete anthropometry data. The samples for the respective  
18  
19 countries are as follows: DRC (9,506), Ghana (3,012), Kenya (9,993), Mozambique (11,017) and  
20  
21 Nigeria (31,170).  
22  
23  
24  
25  
26  
27

### 28 **Ethics statement**

29  
30  
31 The DHS obtained ethical clearance from the ethical committees of the respective countries before  
32  
33 the surveys were conducted. Written informed consent was obtained from the women before  
34  
35 participation. The authors of this paper sought and obtained permission from the DHS program for  
36  
37 the use of the data. The data were completely anonymized and therefore the authors did not seek  
38  
39 further ethical clearance before their use.  
40  
41  
42  
43

### 44 **Patient and Public Involvement statement**

45  
46  
47 We used completely anonymised secondary data for the analysis. Therefore, no patients or public  
48  
49 involvement can be reported.  
50  
51  
52  
53  
54  
55  
56  
57

### Outcome and predictor variables

*Outcome variables:* The outcome variable of interest was women body mass index (BMI) derived from results of height and weight measurements. The Height and weight were measured objectively by trained field technicians using standard techniques (21). Weight measurements were taken using electronic Seca scales with a digital screen, while height measurements were taken using a stadiometer produced by Shorr Productions. BMI, also referred to as Quetelet's Index (27), was derived by dividing weight in kilograms by the squared height in meters. Based on the BMI ( $\text{kg}/\text{m}^2$ ) estimates, and according to World Health Organization guidelines (28), the participants were classified as underweight ( $\text{BMI} < 18.50 \text{ kg}/\text{m}^2$ ), normal weight ( $18.50\text{-}24.99 \text{ kg}/\text{m}^2$ ), overweight ( $25.0\text{-}29.9 \text{ kg}/\text{m}^2$ ) and obese ( $\geq 30.0 \text{ kg}/\text{m}^2$ ). The normal weight ( $18.50\text{-}24.99 \text{ kg}/\text{m}^2$ ) was used as reference category in the analysis.

*Predictor variables:* The predictor variables of interest used in the analysis included, women's age, education, employment status, breastfeeding status, parity, place of residence, marital status, women decision making autonomy (decision on large household purchases and decision on health), household size, frequency of watching TV and household wealth index. These potential correlates were identified based on literature search and further subjected to bivariate analysis to establish their relationship with the DBM indicators. All statistically significant variables were included in the multivariable analysis.

### Analytical strategy

We utilized Multinomial logistic regression (MLR) in the analysis. MLR approach was contemplated to be suitable as the outcome measure is polychotomous by nature. Further, the MLR was considered attractive analytical technique because it does not assume normality, linearity, or homoscedasticity (29). In MLR, we observe vectors  $Y = (y_1, y_2, \dots, y_{k+1})^T$ ;  $y_i = 0$  for all  $i$ , and one  $j$  with  $y_j = 1$  and corresponding probability  $p_j$ , implying

$$EY = p, \text{Cov } Y = \Lambda_p - pp^T, \quad \Lambda_p = \begin{pmatrix} p_1 & \dots & 0 \\ \vdots & \dots & \vdots \\ 0 & \dots & p_{k+1} \end{pmatrix} \quad (1)$$

The multinomial logistic regression is given by

$$p_i = \frac{\exp(\pi^{(i)T} x)}{1 + \sum_{j=1}^k \exp(\pi^{(j)T} x)} \quad \text{for } i = 1, \dots, k \quad (2)$$

$$p_{k+1} = \frac{1}{1 + \sum_{j=1}^k \exp(\pi^{(j)T} x)} \quad (3)$$

Where  $x = (x_1, x_2, \dots, x_m)^T$  is the vector of covariates, and  $\pi^{(i)}$  is the parameter vector corresponding to the  $i$ -th response category. In Equation (3), the parameters are set to zero and allows computing the probability for the base category in the MLR.

Because of the normalization condition,

$$\sum_{j=1}^k P(y^{(j)} = 1 | x, \pi) = 1, \quad (4)$$

the weight vector of one of the classes need not to be estimated without loss of generality, in this case the  $(j+1)$ -th category. To perform maximum likelihood (ML), one simply maximizes the log-likelihood function using Equation (5),

$$\log \prod_{j=1}^{k+1} p_j^{y_j} = \sum_{j=1}^k y_j \pi^{(j)T} x - \log \left[ 1 + \sum_{j=1}^k \exp(\pi^{(j)T} x) \right] \quad (5)$$

The MLR model was constructed to investigate the net effects of the correlates on underweight, overweight, and obesity. Using a BMI category of 18.5–24.99 kg/m<sup>2</sup> (normal weight) as the reference, a set of logistic regressions for underweight, overweight and obese categories was estimated in which, each of the categories was contrasted with the reference category. All covariates were simultaneously entered into the model. Results were presented in the form of coefficients with significance levels and 95% confidence intervals (95% CI).

## Results

### *Descriptive*

Tables 1 and 2 present the characteristics of the samples. The results in Table 1 show that among the five countries, Mozambique had the highest number of normal weight women (78%) followed by DRC (74%), with Ghana having the lowest (59%). Kenya (12%) and DRC (13%) had the highest prevalence of underweight women, while Ghana had the highest number of overweight (23%) and obese (12%) women. In all the countries analysed, the prevalence of overweight and obesity had overtaken underweight. In Table 2, women in Kenya had more years of education, while Mozambique had women with the least years of education. The age of study participants was similar across all the five countries and ranged from 28 years in Mozambique and Kenya to 30 years in Ghana. Further, among all the countries, Ghana had the highest number of women who were working (79%), while Mozambique had the lowest (39%).

**Table 1: Characteristics of the BMI samples**

| Variables                           | DRC<br>Mean/% | Ghana<br>Mean/% | Kenya<br>Mean/% | Mozambique<br>Mean/% | Nigeria<br>Mean/% |
|-------------------------------------|---------------|-----------------|-----------------|----------------------|-------------------|
| <b><i>Body mass index (BMI)</i></b> |               |                 |                 |                      |                   |
| BMI=18.50-24.99 (normal weight)     | 73.50         | 59.20           | 62.00           | 77.60                | 66.10             |
| BMI<18.50 (underweight)             | 12.70         | 5.30            | 11.80           | 5.70                 | 8.70              |

|                            |       |       |       |       |       |
|----------------------------|-------|-------|-------|-------|-------|
| BMI= 25-29.99 (overweight) | 11.50 | 23.40 | 18.90 | 13.70 | 18.30 |
| BMI>=30 (obesity)          | 2.30  | 12.20 | 7.30  | 3.00  | 7.00  |

---

For peer review only



**Table 2: Characteristics of the samples, categorical and continuous variables**

| Variables                          | DRC    |     | Ghana  |     | Kenya  |     | Mozambique |     | Nigeria |     |
|------------------------------------|--------|-----|--------|-----|--------|-----|------------|-----|---------|-----|
|                                    | Mean/% | SD  | Mean/% | SD  | Mean/% | SD  | Mean/%     | SD  | Mean/%  | SD. |
| Women's Education (in years)       | 5.2    | 3.8 | 6.0    | 4.9 | 7.6    | 4.0 | 3.1        | 3.3 | 4.7     | 5.7 |
| Women's Age (in years)             | 29.2   | 6.8 | 30.6   | 6.8 | 28.6   | 6.4 | 28.6       | 7.3 | 29.4    | 7.0 |
| <b>Household wealth index</b>      |        |     |        |     |        |     |            |     |         |     |
| Poorest                            | 22.4   |     | 22.7   |     | 23.4   |     | 23.6       |     | 23.5    |     |
| Poorer                             | 23.0   |     | 19.8   |     | 20.3   |     | 21.4       |     | 23.1    |     |
| Middle                             | 20.6   |     | 20.6   |     | 18.5   |     | 20.0       |     | 18.9    |     |
| Rich                               | 18.6   |     | 18.7   |     | 18.2   |     | 19.9       |     | 17.8    |     |
| Richest                            | 15.5   |     | 18.2   |     | 19.6   |     | 15.1       |     | 16.8    |     |
| Respondent currently working (yes) | 74.9   |     | 78.8   |     | 63.6   |     | 39.3       |     | 68.9    |     |
| Place of residence (urban)         | 29.9   |     | 45.4   |     | 36.1   |     | 27.5       |     | 35.0    |     |
| Household head (Female)            | 21.6   |     | 26.0   |     | 30.4   |     | 30.3       |     | 9.7     |     |
| Parity                             | 4.4    | 2.6 | 3.6    | 2.1 | 3.5    | 2.3 | 3.9        | 2.3 | 4.3     | 2.6 |
| Household size                     | 6.8    | 2.9 | 5.6    | 2.6 | 5.6    | 2.4 | 6.0        | 2.6 | 7.0     | 3.6 |
| <b>Frequency of watching TV</b>    |        |     |        |     |        |     |            |     |         |     |
| Not at all                         | 66.4   |     | 19.6   |     | 22.0   |     | 34.5       |     | 39.8    |     |
| Less than once a week              | 14.6   |     | 32.7   |     | 12.5   |     | 23.2       |     | 25.0    |     |
| At least once a week               | 19.0   |     | 47.7   |     | 65.5   |     | 42.3       |     | 35.2    |     |
| Currently breastfeeding (yes)      | 68.6   |     | 57.8   |     | 54.0   |     | 60.8       |     | 54.8    |     |
| <b>Marital status</b>              |        |     |        |     |        |     |            |     |         |     |

|    |                                              |      |      |      |      |      |
|----|----------------------------------------------|------|------|------|------|------|
| 1  |                                              |      |      |      |      |      |
| 2  |                                              |      |      |      |      |      |
| 3  | Never Married                                | 4.3  | 7.1  | 7.1  | 4.2  | 1.6  |
| 4  | Married or Cohabiting                        | 87.2 | 86.5 | 83.7 | 84.3 | 95.9 |
| 5  | Formerly in union                            | 8.5  | 6.4  | 9.2  | 11.5 | 2.6  |
| 6  |                                              |      |      |      |      |      |
| 7  | <b>Decision on large household purchases</b> |      |      |      |      |      |
| 8  | Respondent alone                             | 8.7  | 20.8 | 29.1 | 17.2 | 4.7  |
| 9  | Both Respondent and partner                  | 31.0 | 42.7 | 34.2 | 39.1 | 29.2 |
| 10 | Partner alone                                | 47.3 | 22.2 | 20.1 | 27.5 | 61.6 |
| 11 | Someone else/Other                           | 0.2  | 0.9  | 0.4  | 0.6  | 0.2  |
| 12 |                                              |      |      |      |      |      |
| 13 | <b>Decision on respondent's health</b>       |      |      |      |      |      |
| 14 | Respondent alone                             | 13.8 | 16.3 | 14.7 | 10.0 | 4.3  |
| 15 | Both Respondent and partner                  | 37.2 | 44.8 | 42.2 | 38.2 | 28.4 |
| 16 | Partner alone                                | 35.6 | 24.4 | 26.3 | 35.4 | 62.8 |
| 17 | Someone else/Other                           | 0.3  | 1.0  | 0.4  | 0.7  | 0.2  |
| 18 |                                              |      |      |      |      |      |
| 19 |                                              |      |      |      |      |      |

SD=Standard deviation; DRC=Democratic Republic of Congo

### *Multivariable*

Tables 3-7 present the MLR results of the correlates of DBM among women in DRC, Ghana, Kenya, Mozambique and Nigeria. The results showed a significant positive relationship between women's years' of education and overweight in Ghana, both overweight and obesity in Mozambique and Nigeria. Thus, compared with normal weight women, an additional year of education was associated with a higher likelihood of overweight and obesity in Ghana, Mozambique and Nigeria. Conversely, number of years of education was associated negatively with underweight in Kenya and Nigeria relative to normal weight. Also, older age was significantly and positively associated with underweight, overweight and obesity compared to normal weight women in all countries included in the analysis. An exception could be made of Nigeria where older age was inversely related to underweight. The results in relation to household wealth index were mixed. While generally, significant positive associations were observed between wealth index (middle, richer and richest quintiles) and overweight and obesity in all the five countries, inverse relationship was observed for underweight. Compared to normal weight women, higher maternal parity was inversely related to underweight in Ghana and Mozambique, and both underweight and overweight in Kenya. In DRC, maternal parity was inversely related to underweight and positively related to obesity. Breastfeeding was associated with less likelihood of underweight among women in DRC and Nigeria, obesity in DRC and Ghana, overweight in Kenya, and overweight and obesity in Mozambique and Nigeria relative to normal weight women.

**Table 3: Multivariable analysis of the association between sociodemographic correlates and malnutrition, DRC**

| Variables                                    | Underweight<br>(BMI<18.50)     | Overweight<br>(BMI=25-29.99)   | Obesity<br>(BMI >=30)         |
|----------------------------------------------|--------------------------------|--------------------------------|-------------------------------|
| Women's Education (in years)                 | 0.030*<br>(-0.004 - 0.064)     | -0.011<br>(-0.052 - 0.030)     | -0.023<br>(-0.093 - 0.047)    |
| Women's Age (in years)                       | 0.041***<br>(0.015 - 0.068)    | 0.034**<br>(0.007 - 0.060)     | -0.045<br>(-0.104 - 0.015)    |
| <b>Household wealth Index</b>                |                                |                                |                               |
| Poorest (reference)                          |                                |                                |                               |
| Poorer                                       | -0.009<br>(-0.306 - 0.288)     | -0.069<br>(-0.488 - 0.351)     | -0.241<br>(-1.575 - 1.094)    |
| Middle                                       | -0.144<br>(-0.534 - 0.247)     | 0.421**<br>(0.039 - 0.804)     | 0.570<br>(-0.529 - 1.669)     |
| Rich                                         | -0.480**<br>(-0.942 - -0.018)  | 0.803*<br>(0.345 - 1.261)      | 2.365***<br>(1.225 - 3.505)   |
| Richest                                      | -1.017***<br>(-1.564 - -0.471) | 1.486*<br>(0.985 - 1.987)      | 4.014***<br>(2.562 - 5.465)   |
| Woman currently working (yes)                | 0.226<br>(-0.052 - 0.504)      | -0.462***<br>(-0.794 - -0.131) | -0.350<br>(-0.850 - 0.149)    |
| Place of residence (urban)                   | -0.246<br>(-0.601 - 0.108)     | 0.034<br>(-0.350 - 0.417)      | -0.094<br>(-0.810 - 0.622)    |
| Sex of household head (female)               | -0.0453<br>(-0.377 - 0.286)    | 0.167<br>(-0.144 - 0.478)      | 0.363<br>(-0.380 - 1.105)     |
| Parity                                       | -0.122***<br>(-0.199 - -0.045) | 0.0335<br>(-0.040 - 0.107)     | 0.350***<br>(0.174 - 0.525)   |
| Household size                               | -0.019<br>(-0.066 - 0.028)     | -0.008<br>(-0.048 - 0.031)     | -0.052<br>(-0.158 - 0.056)    |
| <b>Frequency of watching TV</b>              |                                |                                |                               |
| Not at all (reference)                       |                                |                                |                               |
| Less than once a week                        | 0.089<br>(-0.251 - 0.429)      | 0.165<br>(-0.192 - 0.522)      | -0.209<br>(-0.912 - 0.494)    |
| At least once a week                         | -0.163<br>(-0.623 - 0.298)     | 0.180<br>(-0.140 - 0.500)      | 0.149<br>(-0.373 - 0.671)     |
| Currently breastfeeding                      | 0.327***<br>(0.082 - 0.572)    | -0.010<br>(-0.361 - 0.164)     | -0.512**<br>(-1.020 - -0.005) |
| <b>Marital status</b>                        |                                |                                |                               |
| Never in union (reference)                   |                                |                                |                               |
| Married or Cohabiting                        | -0.766*<br>(-1.567 - 0.0347)   | 0.809*<br>(0.132 - 1.486)      | 0.248<br>(-1.131 - 1.626)     |
| Formerly in union                            | -0.357<br>(-1.126 - 0.413)     | 0.0680<br>(-0.583 - 0.718)     | -0.549<br>(-1.956 - 0.859)    |
| <b>Decision on large household purchases</b> |                                |                                |                               |
| Respondent alone (reference)                 |                                |                                |                               |
| Both Respondent and partner                  | 0.186                          | 0.155                          | 0.885*                        |

|    |                                          |                  |                   |                     |
|----|------------------------------------------|------------------|-------------------|---------------------|
| 1  |                                          |                  |                   |                     |
| 2  |                                          |                  |                   |                     |
| 3  |                                          | (-0.292 - 0.664) | (-0.291 - 0.601)  | (-0.154 - 1.923)    |
| 4  | Partner alone                            | 0.436*           | 0.098             | 0.423               |
| 5  |                                          | (-0.059 - 0.931) | (-0.325 - 0.522)  | (-0.370 - 1.215)    |
| 6  | Someone else/Other                       | -0.787           | -3.160***         | -12.640***          |
| 7  |                                          | (-2.567 - 0.993) | (-5.513 - -0.808) | (-14.160 - -11.130) |
| 8  | <b>Decision on respondent's health</b>   |                  |                   |                     |
| 9  |                                          |                  |                   |                     |
| 10 | Respondent alone (reference)             |                  |                   |                     |
| 11 | Both Respondent and partner              | -0.180           | -0.332            | -0.743*             |
| 12 |                                          | (-0.599 - 0.239) | (-0.731 - 0.067)  | (-1.594 - 0.109)    |
| 13 | Partner alone                            | -0.176           | -0.525**          | -0.602*             |
| 14 |                                          | (-0.552 - 0.201) | (-0.933 - -0.116) | (-1.282 - 0.078)    |
| 15 | Someone else/Other                       | 1.672**          | 0.687             | -14.200***          |
| 16 |                                          | (0.073 - 3.272)  | (-1.990 - 3.363)  | (-15.970 - -12.430) |
| 17 |                                          |                  |                   |                     |
| 18 |                                          |                  |                   |                     |
| 19 | Observations                             | 9,506            | 9,506             | 9,506               |
| 20 | Confidence Intervals (CI) in parentheses |                  |                   |                     |
| 21 | *** p<0.01, ** p<0.05, * p<0.1           |                  |                   |                     |
| 22 |                                          |                  |                   |                     |
| 23 |                                          |                  |                   |                     |
| 24 |                                          |                  |                   |                     |
| 25 |                                          |                  |                   |                     |

**Table 4: Multivariable analysis of the association between sociodemographic correlates and malnutrition, Ghana**

| Variables                      | Underweight<br>BMI<18.50       | Overweight<br>BMI=25-29.99  | Obesity<br>BMI>= 30         |
|--------------------------------|--------------------------------|-----------------------------|-----------------------------|
| Women's Education (in years)   | -0.022<br>(-0.080 - 0.036)     | 0.074***<br>(0.037 - 0.110) | 0.028<br>(-0.014 - 0.070)   |
| Women's Age (in years)         | 0.054**<br>(0.005 - 0.103)     | 0.0405**<br>(0.008 - 0.073) | 0.083***<br>(0.048 - 0.118) |
| <b>Household wealth index</b>  |                                |                             |                             |
| Poorest (reference)            |                                |                             |                             |
| Poorer                         | -0.398<br>(-0.972 - 0.177)     | 0.367<br>(-0.129 - 0.864)   | 1.390***<br>(0.582 - 2.197) |
| Middle                         | -1.050***<br>(-1.768 - -0.331) | 0.893*<br>(0.340 - 1.447)   | 2.804***<br>(1.947 - 3.662) |
| Rich                           | -0.529<br>(-1.426 - 0.369)     | 1.436*<br>(0.878 - 1.995)   | 3.591***<br>(2.615 - 4.568) |
| Richest                        | -1.788***<br>(-3.052 - -0.523) | 1.271*<br>(0.555 - 1.988)   | 4.121***<br>(3.125 - 5.117) |
| Woman currently working (yes)  | -0.125<br>(-0.713 - 0.463)     | 0.121<br>(-0.238 - 0.481)   | 0.0769<br>(-0.424 - 0.577)  |
| Place of residence (urban)     | 0.463*<br>(-0.0488 - 0.975)    | 0.113<br>(-0.250 - 0.477)   | -0.073<br>(-0.582 - 0.435)  |
| Sex of household head (female) | 0.409<br>(-0.276 - 1.093)      | 0.0971<br>(-0.309 - 0.503)  | 0.293<br>(-0.173 - 0.759)   |
| Parity                         | -0.205**<br>(-0.372 - -0.038)  | 0.0719<br>(-0.055 - 0.199)  | 0.0324<br>(-0.118 - 0.183)  |
| Household size                 | 0.021                          | -0.047                      | 0.035                       |

|                                              |                            |                             |                                |
|----------------------------------------------|----------------------------|-----------------------------|--------------------------------|
|                                              | (-0.045 - 0.086)           | (-0.121 - 0.027)            | (-0.077 - 0.147)               |
| <b>Frequency of watching TV</b>              |                            |                             |                                |
| Not at all (reference)                       |                            |                             |                                |
| Less than once a week                        | -0.043<br>(-0.604 - 0.518) | 0.231<br>(-0.240 - 0.703)   | 0.673*<br>(0.0003 - 1.345)     |
| At least once a week                         | -0.233<br>(-0.754 - 0.287) | 0.248<br>(-0.184 - 0.679)   | 0.756**<br>(0.146 - 1.365)     |
| Currently breastfeeding (yes)                | 0.136<br>(-0.364 - 0.637)  | -0.177<br>(-0.525 - 0.171)  | -0.471**<br>(-0.832 - -0.110)  |
| <b>Marital status</b>                        |                            |                             |                                |
| Never in union (reference)                   |                            |                             |                                |
| Married or Cohabiting                        | -0.536<br>(-1.843 - 0.772) | -0.259<br>(-0.904 - 0.386)  | 0.295<br>(-0.860 - 1.451)      |
| Formerly in union                            | 0.271<br>(-0.837 - 1.378)  | 0.420<br>(-0.286 - 1.126)   | 1.435*<br>(0.400 - 2.470)      |
| <b>Decision on large household purchases</b> |                            |                             |                                |
| Respondent alone (reference)                 |                            |                             |                                |
| Both Respondent and partner                  | 0.464<br>(-0.555 - 1.483)  | -0.0143<br>(-0.523 - 0.495) | -0.0496<br>(-0.657 - 0.557)    |
| Partner alone                                | 0.664<br>(-0.217 - 1.546)  | -0.0223<br>(-0.556 - 0.512) | -0.265<br>(-0.917 - 0.386)     |
| Someone else/Other                           | -1.212<br>(-3.637 - 1.213) | -0.0290<br>(-1.485 - 1.426) | 0.752<br>(-1.161 - 2.665)      |
| <b>Decision on respondent's health</b>       |                            |                             |                                |
| Respondent alone (reference)                 |                            |                             |                                |
| Both Respondent and partner                  | 0.0525<br>(-0.868 - 0.973) | 0.785*<br>(0.280 - 1.290)   | 0.787*<br>(0.166 - 1.408)      |
| Partner alone                                | 0.119<br>(-0.643 - 0.881)  | 0.526*<br>(-0.0457 - 1.098) | 0.915*<br>(0.156 - 1.675)      |
| Someone else/Other                           | -0.714<br>(-2.832 - 1.403) | -1.544<br>(-3.520 - 0.433)  | -13.43***<br>(-15.04 - -11.81) |
| Observations                                 | 3,012                      | 3,012                       | 3,012                          |

Confident Intervals (CI) in parentheses

\*\*\* p<0.01, \*\* p<0.05, \* p<0.1

**Table 5: Multivariable analysis of the association between sociodemographic correlates and malnutrition, Kenya**

| Variables                    | Underweight<br>(BMI<18.50)     | Overweight<br>(BMI=25.29.99) | Obesity<br>(BMI>=30)      |
|------------------------------|--------------------------------|------------------------------|---------------------------|
| Women's Education (in years) | -0.113***<br>(-0.148 - -0.078) | 0.013<br>(-0.016 - 0.042)    | 0.013<br>(-0.030 - 0.056) |

|    |                                              |                   |                   |                     |
|----|----------------------------------------------|-------------------|-------------------|---------------------|
| 1  |                                              |                   |                   |                     |
| 2  |                                              |                   |                   |                     |
| 3  | Women's Age (in years)                       | 0.026**           | 0.066***          | 0.120***            |
| 4  |                                              | (0.001 - 0.052)   | (0.046 - 0.089)   | (0.087 - 0.153)     |
| 5  | <b>Household wealth index</b>                |                   |                   |                     |
| 6  |                                              |                   |                   |                     |
| 7  | Poorest (reference)                          |                   |                   |                     |
| 8  | Poorer                                       | -0.488***         | 0.279*            | 0.633*              |
| 9  |                                              | (-0.805 - -0.172) | (-0.025 - 0.582)  | (0.080 - 1.187)     |
| 10 | Middle                                       | -0.500***         | 0.609***          | 0.790*              |
| 11 |                                              | (-0.869 - -0.130) | (0.261 - 0.957)   | (0.268 - 1.311)     |
| 12 | Rich                                         | -0.940***         | 0.927*            | 1.690***            |
| 13 |                                              | (-1.376 - -0.504) | (0.578 - 1.276)   | (1.164 - 2.216)     |
| 14 | Richest                                      | -1.307***         | 1.427***          | 2.616***            |
| 15 |                                              | (-1.946 - -0.668) | (1.042 - 1.813)   | (2.049 - 3.184)     |
| 16 | Woman currently working (yes)                | -0.357***         | 0.0162            | 0.210               |
| 17 |                                              | (-0.590 - -0.123) | (-0.221 - 0.253)  | (-0.110 - 0.529)    |
| 18 | Place of residents (urban)                   | 0.0337            | 0.107             | 0.497***            |
| 19 |                                              | (-0.272 - 0.339)  | (-0.115 - 0.330)  | (0.177 - 0.817)     |
| 20 | Sex of household head (female)               | 0.230             | 0.0205            | -0.0346             |
| 21 |                                              | (-0.0570 - 0.518) | (-0.177 - 0.218)  | (-0.336 - 0.267)    |
| 22 | Parity                                       | -0.164***         | -0.118***         | -0.084              |
| 23 |                                              | (-0.243 - -0.085) | (-0.190 - -0.046) | (-0.199 - 0.030)    |
| 24 | Household size                               | -0.035            | 0.013             | 0.034               |
| 25 |                                              | (-0.089 - 0.019)  | (-0.034 - 0.061)  | (-0.044 - 0.111)    |
| 26 |                                              |                   |                   |                     |
| 27 | <b>Frequency of watching TV</b>              |                   |                   |                     |
| 28 | Not at all                                   |                   |                   |                     |
| 29 | Less than once a week                        | -0.539***         | 0.076             | -0.131              |
| 30 |                                              | (-0.905 - -0.174) | (-0.295 - 0.447)  | (-0.700 - 0.439)    |
| 31 | At least once a week                         | -0.066            | 0.043             | 0.035               |
| 32 |                                              | (-0.355 - 0.223)  | (-0.194 - 0.281)  | (-0.357 - 0.426)    |
| 33 | Currently breastfeeding (yes)                | 0.102             | -0.156*           | -0.204              |
| 34 |                                              | (-0.112 - 0.316)  | (-0.338 - 0.026)  | (-0.510 - 0.102)    |
| 35 |                                              |                   |                   |                     |
| 36 | <b>Marital status</b>                        |                   |                   |                     |
| 37 | Never in union (reference)                   |                   |                   |                     |
| 38 | Married or Cohabiting                        | 0.299             | 0.870*            | 0.898*              |
| 39 |                                              | (-0.197 - 0.794)  | (0.422 - 1.317)   | (0.212 - 1.584)     |
| 40 | Formerly in union                            | 0.209             | 0.488**           | 0.312               |
| 41 |                                              | (-0.339 - 0.756)  | (0.047 - 0.929)   | (-0.392 - 1.017)    |
| 42 |                                              |                   |                   |                     |
| 43 | <b>Decision on household large purchases</b> |                   |                   |                     |
| 44 | Respondent alone (reference)                 |                   |                   |                     |
| 45 | Both Respondent and partner                  | -0.217            | -0.303**          | 0.0495              |
| 46 |                                              | (-0.546 - 0.113)  | (-0.543 - -0.063) | (-0.259 - 0.358)    |
| 47 | Partner alone                                | -0.298*           | -0.0677           | -0.128              |
| 48 |                                              | (-0.641 - 0.045)  | (-0.350 - 0.215)  | (-0.528 - 0.273)    |
| 49 | Someone else/Other                           | -2.309***         | -0.970            | -13.66***           |
| 50 |                                              | (-4.053 - -0.565) | (-3.170 - 1.231)  | (-14.580 - -12.730) |
| 51 |                                              |                   |                   |                     |
| 52 | <b>Decision on respondent's health</b>       |                   |                   |                     |
| 53 | Respondent alone (reference)                 |                   |                   |                     |
| 54 |                                              |                   |                   |                     |
| 55 |                                              |                   |                   |                     |
| 56 |                                              |                   |                   |                     |
| 57 |                                              |                   |                   |                     |
| 58 |                                              |                   |                   |                     |
| 59 |                                              |                   |                   |                     |
| 60 |                                              |                   |                   |                     |

|                             |                                |                            |                                   |
|-----------------------------|--------------------------------|----------------------------|-----------------------------------|
| Both Respondent and partner | -0.0559<br>(-0.427 - 0.315)    | 0.0704<br>(-0.194 - 0.335) | -0.131<br>(-0.524 - 0.262)        |
| Partner alone               | -0.220<br>(-0.601 - 0.161)     | -0.016<br>(-0.301 - 0.268) | -0.183<br>(-0.633 - 0.266)        |
| Someone else/Other          | -2.446***<br>(-4.226 - -0.666) | 0.092<br>(-2.677 - 2.862)  | -12.920***<br>(-14.610 - -11.230) |
| Observations                | 9,993                          | 9,993                      | 9,993                             |

Confidence Intervals (CI) in parentheses

\*\*\* p<0.01, \*\* p<0.05, \* p<0.1

**Table 6: Multivariable analysis of the association between sociodemographic correlates and malnutrition, Mozambique**

| Variables                       | Underweight<br>(BMI<18.50)     | Overweight<br>(BMI=25-29.99)   | Obesity<br>(BMI>=30)           |
|---------------------------------|--------------------------------|--------------------------------|--------------------------------|
| Women's Education (yes)         | 0.011<br>(-0.041 - 0.063)      | 0.044***<br>(0.0127 - 0.076)   | 0.098***<br>(0.041 - 0.156)    |
| Women's Age (in years)          | 0.018<br>(-0.013 - 0.049)      | 0.032***<br>(0.012 - 0.052)    | 0.075***<br>(0.042 - 0.109)    |
| <b>Household Wealth index</b>   |                                |                                |                                |
| Poorest (reference)             |                                |                                |                                |
| Poorer                          | -0.146<br>(-0.479 - 0.187)     | 0.618*<br>(0.222 - 1.015)      | 1.061<br>(-0.529 - 2.650)      |
| Middle                          | -0.741***<br>(-1.118 - -0.365) | 0.856*<br>(0.430 - 1.282)      | 2.424***<br>(1.023 - 3.825)    |
| Rich                            | -0.618***<br>(-1.081 - -0.154) | 1.235*<br>(0.818 - 1.652)      | 2.905***<br>(1.576 - 4.234)    |
| Richest                         | -0.800***<br>(-1.408 - -0.192) | 1.977***<br>(1.517 - 2.437)    | 4.832***<br>(3.496 - 6.168)    |
| Woman currently working (yes)   | 0.195<br>(-0.087 - 0.477)      | -0.0795<br>(-0.271 - 0.112)    | 0.014<br>(-0.371 - 0.400)      |
| Place of residence (urban)      | 0.0766<br>(-0.306 - 0.459)     | -0.0722<br>(-0.350 - 0.205)    | -0.0180<br>(-0.504 - 0.468)    |
| Sex of household head (female)  | -0.342**<br>(-0.649 - -0.036)  | -0.056<br>(-0.264 - 0.153)     | -0.142<br>(-0.570 - 0.286)     |
| Parity                          | -0.124**<br>(-0.224 - -0.023)  | 0.0379<br>(-0.024 - 0.100)     | 0.160**<br>(0.037 - 0.282)     |
| Household size                  | 0.0161<br>(-0.037 - 0.070)     | -0.010<br>(-0.042 - 0.022)     | -0.037<br>(-0.108 - 0.035)     |
| <b>Frequency of watching TV</b> |                                |                                |                                |
| Not at all (reference)          |                                |                                |                                |
| Less than once a week           | -0.0113<br>(-0.328 - 0.306)    | 0.157<br>(-0.091 - 0.404)      | 0.630***<br>(0.214 - 1.047)    |
| At least once a week            | -0.214<br>(-0.518 - 0.0895)    | -0.0124<br>(-0.213 - 0.188)    | 0.044<br>(-0.329 - 0.418)      |
| Currently breastfeeding         | 0.215<br>(-0.049 - 0.478)      | -0.298***<br>(-0.493 - -0.102) | -0.516**<br>(-0.938 - -0.0944) |



|    |                                              |                  |                  |                   |
|----|----------------------------------------------|------------------|------------------|-------------------|
| 1  |                                              |                  |                  |                   |
| 2  |                                              |                  |                  |                   |
| 3  | <b>Marital status</b>                        |                  |                  |                   |
| 4  | Never in union (reference)                   |                  |                  |                   |
| 5  | Married or Cohabiting                        | 0.253            | 0.196            | 0.708*            |
| 6  |                                              | (-0.419 - 0.925) | (-0.223 - 0.615) | (-0.0469 - 1.462) |
| 7  | Formerly in union                            | 0.351            | -0.029           | 0.773**           |
| 8  |                                              | (-0.288 - 0.989) | (-0.462 - 0.404) | (0.0197 - 1.527)  |
| 9  |                                              |                  |                  |                   |
| 10 | <b>Decision on large household purchases</b> |                  |                  |                   |
| 11 | Respondent alone (reference)                 |                  |                  |                   |
| 12 | Both Respondent and partner                  | -0.096           | -0.0634          | -0.0414           |
| 13 |                                              | (-0.472 - 0.281) | (-0.329 - 0.202) | (-0.647 - 0.564)  |
| 14 | Partner alone                                | -0.049           | 0.037            | -0.366            |
| 15 |                                              | (-0.420 - 0.323) | (-0.256 - 0.329) | (-1.022 - 0.289)  |
| 16 | Someone else/Other                           | 0.036            | 0.746            | -0.983            |
| 17 |                                              | (-1.044 - 1.115) | (-0.600 - 2.091) | (-3.268 - 1.303)  |
| 18 |                                              |                  |                  |                   |
| 19 | <b>Decision on respondent's health</b>       |                  |                  |                   |
| 20 | Respondent alone (reference)                 |                  |                  |                   |
| 21 | Both Respondent and partner                  | -0.184           | -0.134           | -0.143            |
| 22 |                                              | (-0.633 - 0.265) | (-0.425 - 0.158) | (-0.777 - 0.491)  |
| 23 | Partner alone                                | -0.317           | -0.148           | 0.227             |
| 24 |                                              | (-0.786 - 0.151) | (-0.440 - 0.144) | (-0.360 - 0.814)  |
| 25 | Someone else/Other                           | -0.480           | -0.646           | -1.232            |
| 26 |                                              | (-1.477 - 0.516) | (-1.649 - 0.357) | (-3.319 - 0.855)  |
| 27 |                                              |                  |                  |                   |
| 28 |                                              |                  |                  |                   |
| 29 | Observations                                 | 11,017           | 11,017           | 11,017            |
| 30 | Confidence Intervals (CI) in parentheses     |                  |                  |                   |
| 31 | *** p<0.01, ** p<0.05, * p<0.1               |                  |                  |                   |
| 32 |                                              |                  |                  |                   |
| 33 |                                              |                  |                  |                   |
| 34 |                                              |                  |                  |                   |

**Table 7: Multivariable analysis of the association between sociodemographic correlates and malnutrition, Nigeria**

| Variable                      | Underweight<br>(BMI<18.50)     | Overweight<br>(BMI=25-29.99) | Obesity<br>(BMI>=30)        |
|-------------------------------|--------------------------------|------------------------------|-----------------------------|
| Women's Education (in years)  | -0.042***<br>(-0.067 - -0.018) | 0.034***<br>(0.019 - 0.049)  | 0.048***<br>(0.028 - 0.068) |
| Women's Age (in years)        | -0.019**<br>(-0.035 - -0.0021) | 0.040***<br>(0.030 - 0.051)  | 0.072***<br>(0.056 - 0.088) |
| <b>Household wealth index</b> |                                |                              |                             |
| Poorest (reference)           |                                |                              |                             |
| Poorer                        | -0.200**<br>(-0.366 - -0.034)  | 0.289***<br>(0.090 - 0.488)  | 0.208<br>(-0.280 - 0.697)   |
| Middle                        | -0.291**<br>(-0.517 - -0.0650) | 0.691***<br>(0.479 - 0.903)  | 0.788*<br>(0.298 - 1.278)   |
| Rich                          | -0.208<br>(-0.477 - 0.0614)    | 0.998*<br>(0.764 - 1.232)    | 1.196*<br>(0.694 - 1.698)   |
| Richest                       | -0.530***<br>(-0.921 - -0.139) | 1.351***<br>(1.074 - 1.628)  | 1.862***<br>(1.353 - 2.372) |

|    |                                              |                    |                    |                    |
|----|----------------------------------------------|--------------------|--------------------|--------------------|
| 1  |                                              |                    |                    |                    |
| 2  |                                              |                    |                    |                    |
| 3  | Woman currently working (yes)                | -0.0518            | 0.0231             | -0.292***          |
| 4  |                                              | (-0.198 - 0.0944)  | (-0.102 - 0.148)   | (-0.497 - -0.0878) |
| 5  | Place of residence (urban)                   | 0.166              | 0.0775             | 0.178*             |
| 6  |                                              | (-0.0500 - 0.381)  | (-0.0643 - 0.219)  | (-0.0244 - 0.379)  |
| 7  | Sex of household head (female)               | -0.0836            | 0.0127             | -0.084             |
| 8  |                                              | (-0.336 - 0.169)   | (-0.149 - 0.174)   | (-0.300 - 0.133)   |
| 9  | Parity                                       | -0.011             | 0.039**            | 0.0230             |
| 10 |                                              | (-0.0538 - 0.0313) | (0.009 - 0.0698)   | (-0.021 - 0.067)   |
| 11 | Household size                               | 0.007              | -0.009             | 0.023*             |
| 12 |                                              | (-0.015 - 0.029)   | (-0.025 - 0.00654) | (-0.002 - 0.047)   |
| 13 |                                              |                    |                    |                    |
| 14 | <b>Frequency of watching TV</b>              |                    |                    |                    |
| 15 |                                              |                    |                    |                    |
| 16 | Not at all (reference)                       |                    |                    |                    |
| 17 | Less than once a week                        | -0.146             | 0.0771             | 0.0585             |
| 18 |                                              | (-0.336 - 0.045)   | (-0.056 - 0.210)   | (-0.162 - 0.278)   |
| 19 | At least once a week                         | -0.252***          | 0.155**            | 0.205*             |
| 20 |                                              | (-0.438 - -0.066)  | (0.024 - 0.285)    | (-0.009 - 0.420)   |
| 21 | Currently breastfeeding                      | 0.178***           | -0.176***          | -0.363***          |
| 22 |                                              | (0.043 - 0.314)    | (-0.278 - -0.073)  | (-0.524 - -0.202)  |
| 23 |                                              |                    |                    |                    |
| 24 | <b>Marital status</b>                        |                    |                    |                    |
| 25 |                                              |                    |                    |                    |
| 26 | Never in union                               |                    |                    |                    |
| 27 | Married or Cohabiting                        | -0.177             | 0.633*             | 0.557*             |
| 28 |                                              | (-0.652 - 0.299)   | (0.188 - 1.078)    | (-0.090 - 1.204)   |
| 29 | Formerly in union                            | 0.0721             | 0.921*             | 1.071*             |
| 30 |                                              | (-0.400 - 0.545)   | (0.426 - 1.416)    | (0.417 - 1.724)    |
| 31 |                                              |                    |                    |                    |
| 32 | <b>Decision on large household purchases</b> |                    |                    |                    |
| 33 |                                              |                    |                    |                    |
| 34 | Respondent alone                             |                    |                    |                    |
| 35 | Both Respondent and partner                  | -0.206             | 0.0218             | 0.341*             |
| 36 |                                              | (-0.641 - 0.230)   | (-0.209 - 0.252)   | (-0.002 - 0.684)   |
| 37 | Partner alone                                | -0.181             | -0.015             | -0.177             |
| 38 |                                              | (-0.579 - 0.218)   | (-0.238 - 0.209)   | (-0.538 - 0.184)   |
| 39 | Someone else/Other                           | 1.314*             | -0.651             | -0.225             |
| 40 |                                              | (-0.239 - 2.866)   | (-1.912 - 0.609)   | (-1.731 - 1.281)   |
| 41 |                                              |                    |                    |                    |
| 42 | <b>Decision on respondent's health</b>       |                    |                    |                    |
| 43 |                                              |                    |                    |                    |
| 44 | Respondent alone (reference)                 |                    |                    |                    |
| 45 | Both Respondent and partner                  | -0.0847            | -0.0141            | -0.192             |
| 46 |                                              | (-0.525 - 0.356)   | (-0.251 - 0.223)   | (-0.547 - 0.163)   |
| 47 | Partner alone                                | 0.069              | 0.025              | -0.088             |
| 48 |                                              | (-0.334 - 0.474)   | (-0.206 - 0.256)   | (-0.460 - 0.283)   |
| 49 | Someone else/Other                           | -2.381***          | -1.369**           | -2.604**           |
| 50 |                                              | (-1.417 - -0.423)  | (-4.688 - -3.669)  | (-7.160 - -5.311)  |
| 51 | Observations                                 | 31,170             | 31,170             | 31,170             |

Confidence Intervals (CI) in parentheses

\*\*\* p<0.01, \*\* p<0.05, \* p<0.1

1  
2  
3 The figures 1 and 2 are pictorial presentations of the probability of women falling into underweight,  
4  
5 overweight and obese categories if there were changes in their age and years of education.  
6  
7

8 **Figure 1: Graphical Illustration of the results of the probability of falling into the DBM**  
9 **categories when years of education increase**  
10  
11  
12  
13  
14  
15  
16  
17

18 **Figure 2: Graphical Illustration of results of the probability of falling into the DBM categories**  
19 **when age increases**  
20  
21  
22  
23

## 24 **Discussion**

25  
26  
27 This study investigated the correlates of DBM among women in five sub-Saharan African (SSA)  
28 countries. The key indicators of DBM used in the analysis were, underweight, overweight and  
29 obesity. The results showed expectedly that there are some variations across countries on how the  
30 correlates included in this study are associated with DBM. Our analysis reveals that in Ghana,  
31 Mozambique and Nigeria, a higher number of years of formal education is associated with the  
32 likelihood of overweight and obesity relative to normal weight women. Thus, a higher number of  
33 years of education is a risk factor for women with unhealthy weight. This could be due to lifestyles  
34 changes as one achieve more years of education, which may include sedentary lifestyles and poor  
35 dietary patterns (30). Further, it could be that people who are already overweight or obese have  
36 higher propensity of adding more weight relative to those who have normal weight. In contrast,  
37 there was an inverse relationship between the number of years of formal education and  
38 underweight in Kenya and Nigeria. These findings are in line with previous studies. In Ghana, higher  
39  
40  
41  
42  
43  
44  
45  
46  
47  
48  
49  
50  
51  
52  
53  
54  
55  
56  
57  
58  
59  
60

1  
2  
3 education was associated with overweight and obesity among women (31). Additionally, high  
4  
5 education was associated positively with overweight among women in Indonesia (32).  
6  
7 Nevertheless, in the same study, high education was associated with reduced risk of being  
8  
9 underweight by 10–30% (32). This is contrary to our findings in Kenya and Nigeria.  
10  
11  
12  
13  
14  
15

16 Furthermore, age was associated positively with all the DBM indicators across the five countries.  
17  
18 Thus, older women are more likely to be overweight and obese and less likely to be underweight.  
19  
20 This suggests that older age is a protective factor for underweight, while a risk factor for  
21  
22 overweight and obesity. This positive correlation between age, and overweight and obesity, may  
23  
24 have a consequential effect on non-communicable diseases (NCDs) among older people, as an  
25  
26 unhealthy weight is a major risk factor for NCDs (33-36). An exception to these findings could be  
27  
28 made of Nigeria where older age was associated negatively with underweight women. This implies  
29  
30 that in this setting, the older women become the more likelihood that they will suffer from  
31  
32 underweight. The consequential effect of this may be poor health outcomes, as being underweight  
33  
34 exposes women to higher risks of morbidity and mortality during pregnancy and child birth (37-  
35  
36 39). The relationship between age and DBM has been documented in previous studies. For  
37  
38 example, Doku and Neupane observed a significant positive association between age and the key  
39  
40 indicators of DBM in Ghana (31). A study in Bangladesh observed a significant positive relationship  
41  
42 between older age and DBM (40). These findings together with the findings from our study  
43  
44 confirmed the contribution of age to the DBM epidemic.  
45  
46  
47  
48  
49  
50  
51  
52  
53  
54  
55  
56  
57  
58  
59  
60

1  
2  
3 Our analysis showed that household wealth index had mixed effects on DBM. In general, the three  
4 rich quintiles: middle, richer and richest were associated significantly and positively with  
5 overweight and obesity among women across all the countries included in the analysis. This may  
6  
7  
8  
9  
10 be due to obesogenic effects of increased household wealth as dietary pattern changes (41), and  
11  
12  
13 the fact that there is a documented positive correlation between household wealth and unhealthy  
14  
15  
16  
17  
18  
19  
20  
21  
22  
23  
24  
25  
26  
27  
28  
29  
30  
31  
32  
33  
34  
35  
36  
37  
38  
39  
40  
41  
42  
43  
44  
45  
46  
47  
48  
49  
50  
51  
52  
53  
54  
55  
56  
57  
58  
59  
60

Our analysis showed that household wealth index had mixed effects on DBM. In general, the three rich quintiles: middle, richer and richest were associated significantly and positively with overweight and obesity among women across all the countries included in the analysis. This may be due to obesogenic effects of increased household wealth as dietary pattern changes (41), and the fact that there is a documented positive correlation between household wealth and unhealthy body weight (42, 43). In Bangladesh and Nepal, higher household wealth was associated with an increased likelihood of being overweight and obese (42). Also, being rich was associated with overweight and obesity among Ghanaian women (31). Interestingly, higher household wealth had an inverse effect on underweight. This inverse relationship may be due to the fact that most underweight women are likely to be in the poorer wealth quintiles (44) and therefore, may be unaffected by the higher household wealth quintiles. The inverse relationship has been observed previously (45). Relatedly, compared to the richest, women from the poorest households were significantly most likely to be underweight and least likely to be overweight over normal weight in Bangladesh (17). Suggesting that being in the poorest household is protective against overweight but not underweight (44).

The health benefits of breastfeeding were illuminated in this study. Breastfeeding was found to associate with less likelihood of underweight, overweight and obesity in the five countries analysed. This suggests that mothers who have unhealthy weight should be encourage to practice breastfeeding as the benefits are not only to their offspring but also for their own health and wellbeing. These findings confirm the widely recognized benefits of breastfeeding for improved health and developmental outcomes in mothers and their infants (46-49). The implication of this

1  
2  
3 may be that interventions to promote breastfeeding may have positive impact on the DBM  
4  
5 epidemic at the national level. The benefits of breastfeeding to women health have previously  
6  
7 been documented. For example, breastfeeding has been suggested as an efficient means of  
8  
9 promoting postpartum weight loss due to its high energy cost (50). Further evidence suggest that  
10  
11 at 12 weeks postpartum, exclusively breastfeeding (EBF) mothers had lost more total body weight  
12  
13 than mixed feeding mothers. However, mixed feeding mothers lost slightly more percent body fat  
14  
15 than exclusively breastfeeding mothers (50).The authors concluded that EBF promotes greater  
16  
17 weight loss than mixed feeding among mothers even in the early postpartum period. Several other  
18  
19 studies have shown that EBF influences postpartum weight loss (49-52). The preceding discussion  
20  
21 points to the need for health policy makers to design programmes to encourage mothers to  
22  
23 breastfeed, especially, practice exclusive breastfeeding as a means of DBM prevention.  
24  
25  
26  
27  
28  
29  
30  
31  
32

33  
34 An important strength of our study is the use of large nationally representative samples, thereby  
35  
36 providing more robust estimates of observed associations as well as enhancing the generalizability  
37  
38 of the findings. The use of multi-country data help unmask differences and commonalities in the  
39  
40 effects of the correlates on DBM across countries, which would not have been possible with single  
41  
42 country data. Additionally, the height and weight data which were used to compute the BMI were  
43  
44 objectively measured, reducing possible misclassification. A limitation worth mentioning is the  
45  
46 cross-sectional nature of the data, which does not lends itself to the establishments of causal  
47  
48 relationship between the predictor and outcome variables. The conclusions in the paper are  
49  
50 therefore interpreted as mere associations between the predictor variables and the outcome  
51  
52 variable. Another limitation is that due to data limitation, we were not able to examine DBM at the  
53  
54  
55  
56  
57  
58  
59  
60

1  
2  
3 individual and within households. The analysis and interpretation in this paper are therefore  
4  
5 limited to DBM at population or national level, whereby underweight, overweight and obesity co-  
6  
7 exist in the same country.  
8  
9

## 10 11 12 13 14 **Conclusions**

15  
16  
17 The study investigated the correlates of the DBM in five SSA countries. The analysis revealed that  
18  
19 the effects of the correlates on DBM are largely similar across countries, except in few cases where  
20  
21 there were disparities in the effects. The results indicate that higher number of years of education  
22  
23 increases the likelihood of overweight and obesity among women in Ghana, Mozambique and  
24  
25 Nigeria. Conversely, number of years of education is associated negatively with underweight in  
26  
27 Kenya and Nigeria. Living in better-off households increases significantly the likelihood of  
28  
29 overweight and obesity among women across all countries, while associated with the likelihood of  
30  
31 underweight. Interventions to address DBM should take into account socioeconomic status. This  
32  
33 may include providing special programmes for women who have unhealthy weight in wealthy  
34  
35 households. A unit change in age is also associated significantly and positively with underweight,  
36  
37 overweight and obesity in all the countries included in the analysis. Breastfeeding is associated  
38  
39 with least likelihood of underweight, overweight and obesity in breastfeeding mothers. This  
40  
41 implies that interventions to prevent DBM should incorporate breastfeeding to enhance their  
42  
43 effectiveness.  
44  
45  
46  
47  
48  
49  
50  
51  
52  
53  
54  
55  
56  
57  
58  
59  
60

## Acknowledgements

We wish to express our profound gratitude to The DHS Program, USA for providing us access to the data. We also wish to acknowledge institutions of respective countries that played critical roles in the data collection process.

## Competing Interest

The authors have no competing interests to declare.

## Funding

This study did not receive funding from any source.

## Data Sharing Statement

This study was a re-analysis of existing data that are publicly available from The DHS Program at <http://dhsprogram.com/publications/publication-fr221-dhs-final-reports.cfm>. Data are accessible free of charge upon a registration with the Demographic and Health Survey program (The DHS Program). The registration is done on the DHS website indicated above.

## Authors' Contribution

DAA conceived and designed the study. DAA and ZTD conducted the data analysis, interpreted the results and drafted the manuscript. CK contributed to study design, data analysis, interpretation, and critical revision of the manuscript. All authors take responsibility of any issues that might arise from the publication of this manuscript.



## References

1. World Health Organization (2017). Double burden of malnutrition <http://www.who.int/nutrition/double-burden-malnutrition/en/> (access on August 2018)
2. Shrimpton R, Rokx C (2012). The Double Burden of Malnutrition : A Review of Global Evidence. Health, Nutrition and Population Discussion Paper;. World Bank, Washington, DC. World Bank. <https://openknowledge.worldbank.org/handle/10986/27417>.
3. NCD Risk Factor Collaboration (2016). Trends in adult body-mass index in 200 countries from 1975 to 2014: a pooled analysis of 1698 population-based measurement studies with 19·2 million participants *The Lancet* 387(10026):1377-296.
4. Kolčić I (2012). Double burden of malnutrition: A silent driver of double burden of disease in low- and middle-income countries. *J Glo Health* 2(2):020303.
5. World Health Organization (2011). Global Status Report on Non-communicable diseases 2010. Geneva: WHO.
6. Amugsi DA, Dimbuene ZT, Mberu B, et al (2017). Prevalence and time trends in overweight and obesity among urban women: an analysis of demographic and health surveys data from 24 African countries, 1991–2014. *BMJ Open* 7, :e017344.
7. Mendez MA, Monteiro CA, Popkin BM (2005). Overweight Exceeds Underweight Among Women in Most Developing Countries *Am J Clin Nutr* 81, 714-21.
8. Delisle H (2008). Poverty. The Double Burden of Malnutrition in Mothers and the Intergenerational Impact. *Ann NY Acad Sci* 1136, 172-84.
9. World Health Organization (2002). World Health Report 2002. Reducing risks, promoting healthy life. Geneva. .
10. World Health Organization (2009). Global health risks: mortality and burden of disease attributable to selected major risks [http://www.who.int/healthinfo/global\\_burden\\_disease/GlobalHealthRisks\\_report\\_full.pdf](http://www.who.int/healthinfo/global_burden_disease/GlobalHealthRisks_report_full.pdf) (access July 2018).
11. Delisle H (2005). Early nutritional influences on obesity, diabetes and cardiovascular disease risk. International Workshop, 6-9 June 2004, Montreal University, Quebec, Canada. *Matern Child Nutr* 1(3):128-9.
12. World Health Organization (2018). Urgent action needed to tackle the double burden of malnutrition and to achieve Universal Health Coverage and Sustainable Development Goals in Africa <https://www.afro.who.int/news/urgent-action-needed-tackle-double-burden-malnutrition-and-achieve-universal-health-coverage> (access July 2018).
13. Kennedy G, Nantel G, Shetty P (2006). Assessment of the double burden of malnutrition in six case study countries <http://www.fao.org/docrep/009/a0442e/a0442e03.htm#TopOfPage> (access July 2018).
14. Hasan M, Sutradhar I, Shahabuddin A, Sarker M (2017). Double Burden of Malnutrition among Bangladeshi Women: A Literature Review. Muacevic A, Adler JR, eds. *Cureus* 9(12).

15. Sarma H, Saquib N, Hasan MM et al (2016). Determinants of overweight or obesity among ever-married adult women in Bangladesh. *BMC obesity* 3, 13.
16. Zeba AN, Delisle HF, Renier G et al (2012). The double burden of malnutrition and cardiometabolic risk widens the gender and socio-economic health gap: a study among adults in Burkina Faso (West Africa). *Public Health Nutr* 15(12):2210-9.
17. Kamal SM, Hassan CH, Alam GM (2015). Dual burden of underweight and overweight among women in Bangladesh: patterns, prevalence, and sociodemographic correlates. *J Health Popul Nutr* 33, 92-105.
18. Kimani-Murage EW, Muthuri SK, Oti SO (2015). Evidence of a Double Burden of Malnutrition in Urban Poor Settings in Nairobi, Kenya. *PloS One* 10, :e0129943.
19. The DHS Program (2018). Demographic and Health Surveys <http://dhsprogram.com/data/available-datasets.cfm> (access August 2018).
20. The DHS Program (2018). Demographic and Health Surveys [https://dhsprogram.com/data/dataset\\_admin/download-datasets.cfm](https://dhsprogram.com/data/dataset_admin/download-datasets.cfm) (access July 2018).
21. The DHS Program (2018). DHS Methodology. <http://dhsprogram.com/What-We-Do/Survey-Types/DHS-Methodology.cfm> (access July 2018).
22. Ghana Statistical Service (GSS), Ghana Health Service (GHS), ICF Macro (2009). Ghana Demographic and Health Survey 2008 Accra, Ghana: GSS, GHS, and ICF Macro
23. Ministry of Health and Social Services (MoHSS), Macro International Inc (2008). Namibia Demographic and Health Survey 2006-07 Windhoek, Namibia and Calverton, Maryland, USA: MoHSS and Macro International Inc.
24. Ghana Statistical Service (GSS), Ghana Health Service (GHS), ICF International (2015). Ghana Demographic and Health Survey 2014. Rockville, Maryland, USA: GSS, GHS, and ICF International.
25. National Population Commission (NPC) [Nigeria], ICF International (2014). Nigeria Demographic and Health Survey 2013. Abuja, Nigeria, and Rockville, Maryland, USA: NPC and ICF International.
26. National Bureau of Statistics-Kenya, ICF International (2015). 2014 KDHS Key Findings. Rockville, Maryland, USA: KNBS and ICF International.
27. Eknoyan G, Adolphe Quetelet (1796 –1874) (2008) - the average man and indices of obesity . *Nephrol Dial Transplant* 23,47-51.
28. World Health Organization (2006). BMI classification: WHO [http://apps.who.int/bmi/index.jsp?introPage=intro\\_3.html](http://apps.who.int/bmi/index.jsp?introPage=intro_3.html) (access August 2018).
29. Starkweather J, Moske KA (2011). Multinomial Logistic Regression [https://it.unt.edu/sites/default/files/mlr\\_jds\\_aug2011.pdf](https://it.unt.edu/sites/default/files/mlr_jds_aug2011.pdf) (access August 2018).
30. Kautzky-Willer A, Dorner T, Jensby A, Rieder A (2012). Women show a closer association between educational level and hypertension or diabetes mellitus than males: a secondary analysis from the Austrian HIS. *BMC Public Health* 12, 392
31. Doku DT, Neupane S (2015). Double burden of malnutrition: increasing overweight and obesity and stall underweight trends among Ghanaian women. *BMC Public Health* 15, 670.
32. Hanandita W, Tampubolon G (2015). The double burden of malnutrition in Indonesia: Social determinants and geographical variations. *SSM - Population Health* 1, 16-25.
33. Kunutsor S, Powles J (2009). Descriptive epidemiology of blood pressure in a rural adult population in Northern Ghana *Rural Remote Health* 9,1095.
34. Agyemang C (2006). Rural and urban differences in blood pressure and hypertension in Ghana, West Africa *Public Health* 120(6):525-33.
35. Van Middendorp D, Asbroek A, Bio FY et al (2013). Rural and urban differences in blood pressure and pregnancy-induced hypertension among pregnant women in Ghana *Global Health* 9, 59

- 1  
2  
3 36. Nichols SR, Elliott P (1996). Hypertension. In: Murray CJL, Lopez AD, editors. Quantifying Global  
4 Health Risks: the Burden of Disease Attributable to Selected Risk Factors. Cambridge, Massachusetts:  
5 Harvard University Press
- 6 37. Negoro H, Sugino Y, Nishizawa K et al (2015). Underweight body mass index is a risk factor of  
7 mortality in outpatients with nocturia in Japan. *BMC Research Notes* 8, 490.
- 8 38. Park D, Lee J-H, Han S (2017). Underweight: another risk factor for cardiovascular disease? A cross-  
9 sectional 2013 Behavioral Risk Factor Surveillance System (BRFSS) study of 491,773 individuals in the USA.  
10 *Medicine* 96, e8769.
- 11 39. Victora CG, Adair L, Fall C, et al (2008). Maternal and child undernutrition: consequences for adult  
12 health and human capital. *Lancet* 371(9609):340-57.
- 13 40. Oddo V, H Rah J, D Semba R et al (2012). Predictors of maternal and child double burden of  
14 malnutrition in rural Indonesia and Bangladesh *Am J Clin Nutr* 95(4):951-8 .
- 15 41. Aitsi-Selmi A, Bell R, Shipley MJ, Marmot MG (2014). Education Modifies the Association of  
16 Wealth with Obesity in Women in Middle-Income but Not Low-Income Countries: An Interaction Study  
17 Using Seven National Datasets, 2005-2010. *PloS One* 9, e90403.
- 18 42. Bishwajit G (2017). Household wealth status and overweight and obesity among adult women in  
19 Bangladesh and Nepal. *Obesity science & practice* 3(2):185-92.
- 20 43. Balarajan Y, Villamor E (2009). Nationally representative surveys show recent increases in the  
21 prevalence of overweight and obesity among women of reproductive age in Bangladesh, Nepal, and India.  
22 *J Nutr* 139(11):2139-44.
- 23 44. Tebekaw Y, Teller C, Colon-Ramos U (2014). The burden of underweight and overweight among  
24 women in Addis Ababa, Ethiopia. *BMC Public Health*, 14, 1126.
- 25 45. Selvamani Y, Singh P (2018). Socioeconomic patterns of underweight and its association with self-  
26 rated health, cognition and quality of life among older adults in India. *PloS One* 13, e0193979.
- 27 46. Jonas W, Nissen E, Ransjö-Arvidson AB et al (2008). Short- and long-term decrease of blood  
28 pressure in women during breastfeeding *Breastfeed Med* 3(2):103-9.
- 29 47. Handlin L, Jonas W, Ransjö-Arvidson AB et al (2012). Influence of common birth interventions on  
30 maternal blood pressure patterns during breastfeeding 2 days after birth *Breastfeed Med* 7(2):93-9.
- 31 48. Stuebe AM, Schwarz EB, Grewen K et al (2011). Duration of Lactation and Incidence of Maternal  
32 Hypertension: A Longitudinal Cohort Study. *Am J Epidemiol* 174(10):1147-58.
- 33 49. Samano R, Martinez-Rojano H, Godinez Martinez E et al (2013). Effects of breastfeeding on weight  
34 loss and recovery of pregestational weight in adolescent and adult mothers. *Food Nutr Bull* 34(2):123-30.
- 35 50. Hatsu IE, McDougald DM, Anderson AK (2008). Effect of infant feeding on maternal body  
36 composition. *Int Breastfeed J* 3, 18.
- 37 51. Lopez-Olmedo N, Hernandez-Cordero S et al (2016). The Associations of Maternal Weight Change  
38 with Breastfeeding, Diet and Physical Activity During the Postpartum Period. *Matern Child Health J*  
39 20(2):270-80.
- 40 52. Schalla SC, Witcomb GL, Haycraft E (2017). Body Shape and Weight Loss as Motivators for  
41 Breastfeeding Initiation and Continuation. *Int J Environ Res Public Health* 14 (7).
- 42  
43  
44  
45  
46  
47  
48  
49  
50  
51  
52  
53  
54  
55  
56  
57  
58  
59  
60

1  
2  
3  
4  
5  
6  
7  
8  
9  
10  
11  
12  
13  
14  
15  
16  
17  
18  
19  
20  
21  
22  
23  
24  
25  
26  
27  
28  
29  
30  
31  
32  
33  
34  
35  
36  
37  
38  
39  
40  
41  
42  
43  
44  
45  
46  
47  
48  
49  
50  
51  
52  
53  
54  
55  
56  
57  
58  
59  
60

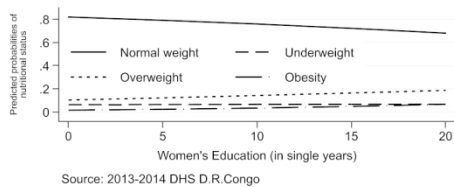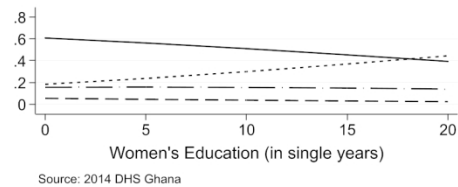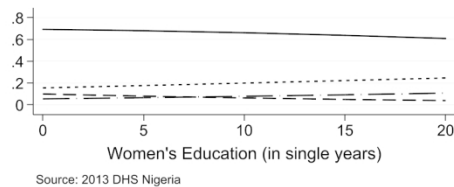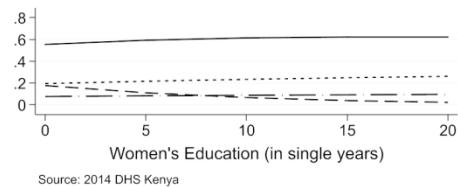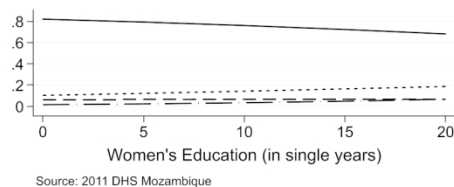

152x101mm (300 x 300 DPI)

1  
2  
3  
4  
5  
6  
7  
8  
9  
10  
11  
12  
13  
14  
15  
16  
17  
18  
19  
20  
21  
22  
23  
24  
25  
26  
27  
28  
29  
30  
31  
32  
33  
34  
35  
36  
37  
38  
39  
40  
41  
42  
43  
44  
45  
46  
47  
48  
49  
50  
51  
52  
53  
54  
55  
56  
57  
58  
59  
60



152x101mm (300 x 300 DPI)

**STROBE 2007 (v4) Statement—Checklist of items that should be included in reports of *cross-sectional studies***

| Section/Topic                | Item # | Recommendation                                                                                                                                                                       | Reported on page # |
|------------------------------|--------|--------------------------------------------------------------------------------------------------------------------------------------------------------------------------------------|--------------------|
| <b>Title and abstract</b>    | 1      | (a) Indicate the study's design with a commonly used term in the title or the abstract                                                                                               | 1                  |
|                              |        | (b) Provide in the abstract an informative and balanced summary of what was done and what was found                                                                                  | 2                  |
| <b>Introduction</b>          |        |                                                                                                                                                                                      |                    |
| Background/rationale         | 2      | Explain the scientific background and rationale for the investigation being reported                                                                                                 | 4-6-               |
| Objectives                   | 3      | State specific objectives, including any prespecified hypotheses                                                                                                                     | 7                  |
| <b>Methods</b>               |        |                                                                                                                                                                                      |                    |
| Study design                 | 4      | Present key elements of study design early in the paper                                                                                                                              | 7-8                |
| Setting                      | 5      | Describe the setting, locations, and relevant dates, including periods of recruitment, exposure, follow-up, and data collection                                                      | 7-9                |
| Participants                 | 6      | (a) Give the eligibility criteria, and the sources and methods of selection of participants                                                                                          | 8                  |
| Variables                    | 7      | Clearly define all outcomes, exposures, predictors, potential confounders, and effect modifiers. Give diagnostic criteria, if applicable                                             | 8-9                |
| Data sources/<br>measurement | 8*     | For each variable of interest, give sources of data and details of methods of assessment (measurement). Describe comparability of assessment methods if there is more than one group | 8-9                |
| Bias                         | 9      | Describe any efforts to address potential sources of bias                                                                                                                            |                    |
| Study size                   | 10     | Explain how the study size was arrived at                                                                                                                                            |                    |
| Quantitative variables       | 11     | Explain how quantitative variables were handled in the analyses. If applicable, describe which groupings were chosen and why                                                         | 9-10               |
| Statistical methods          | 12     | (a) Describe all statistical methods, including those used to control for confounding                                                                                                | 9-10               |
|                              |        | (b) Describe any methods used to examine subgroups and interactions                                                                                                                  | 9-10               |
|                              |        | (c) Explain how missing data were addressed                                                                                                                                          | 9-10               |
|                              |        | (d) If applicable, describe analytical methods taking account of sampling strategy                                                                                                   |                    |
|                              |        | (e) Describe any sensitivity analyses                                                                                                                                                | NA                 |
| <b>Results</b>               |        |                                                                                                                                                                                      |                    |

|                          |     |                                                                                                                                                                                                              |       |
|--------------------------|-----|--------------------------------------------------------------------------------------------------------------------------------------------------------------------------------------------------------------|-------|
| Participants             | 13* | (a) Report numbers of individuals at each stage of study—eg numbers potentially eligible, examined for eligibility, confirmed eligible, included in the study, completing follow-up, and analysed            | 8     |
|                          |     | (b) Give reasons for non-participation at each stage                                                                                                                                                         | 8     |
|                          |     | (c) Consider use of a flow diagram                                                                                                                                                                           | NA    |
| Descriptive data         | 14* | (a) Give characteristics of study participants (eg demographic, clinical, social) and information on exposures and potential confounders                                                                     | 11-12 |
|                          |     | (b) Indicate number of participants with missing data for each variable of interest                                                                                                                          | NA    |
| Outcome data             | 15* | Report numbers of outcome events or summary measures                                                                                                                                                         | NA    |
| Main results             | 16  | (a) Give unadjusted estimates and, if applicable, confounder-adjusted estimates and their precision (eg, 95% confidence interval). Make clear which confounders were adjusted for and why they were included | 9-10  |
|                          |     | (b) Report category boundaries when continuous variables were categorized                                                                                                                                    | 10    |
|                          |     | (c) If relevant, consider translating estimates of relative risk into absolute risk for a meaningful time period                                                                                             | NA    |
| Other analyses           | 17  | Report other analyses done—eg analyses of subgroups and interactions, and sensitivity analyses                                                                                                               | NA    |
| <b>Discussion</b>        |     |                                                                                                                                                                                                              |       |
| Key results              | 18  | Summarise key results with reference to study objectives                                                                                                                                                     | 21    |
| Limitations              | 19  | Discuss limitations of the study, taking into account sources of potential bias or imprecision. Discuss both direction and magnitude of any potential bias                                                   | 24    |
| Interpretation           | 20  | Give a cautious overall interpretation of results considering objectives, limitations, multiplicity of analyses, results from similar studies, and other relevant evidence                                   | 21-24 |
| Generalisability         | 21  | Discuss the generalisability (external validity) of the study results                                                                                                                                        | 25    |
| <b>Other information</b> |     |                                                                                                                                                                                                              |       |
| Funding                  | 22  | Give the source of funding and the role of the funders for the present study and, if applicable, for the original study on which the present article is based                                                | NA    |

\*Give information separately for cases and controls in case-control studies and, if applicable, for exposed and unexposed groups in cohort and cross-sectional studies.

**Note:** An Explanation and Elaboration article discusses each checklist item and gives methodological background and published examples of transparent reporting. The STROBE checklist is best used in conjunction with this article (freely available on the Web sites of PLoS Medicine at <http://www.plosmedicine.org/>, Annals of Internal Medicine at <http://www.annals.org/>, and Epidemiology at <http://www.epidem.com/>). Information on the STROBE Initiative is available at [www.strobe-statement.org](http://www.strobe-statement.org).

# BMJ Open

## Correlates of the double burden of malnutrition among women: an analysis of cross sectional survey data from sub-Saharan Africa

|                                 |                                                                                                                                                                                                                                                       |
|---------------------------------|-------------------------------------------------------------------------------------------------------------------------------------------------------------------------------------------------------------------------------------------------------|
| Journal:                        | <i>BMJ Open</i>                                                                                                                                                                                                                                       |
| Manuscript ID                   | bmjopen-2019-029545.R2                                                                                                                                                                                                                                |
| Article Type:                   | Research                                                                                                                                                                                                                                              |
| Date Submitted by the Author:   | 24-May-2019                                                                                                                                                                                                                                           |
| Complete List of Authors:       | Amugsi, Dickson; African Population and Health Research Center, Urbanization and Wellbeing<br>DIMBUENE, ZACHARIE; University of Kinshasa, Population Sciences and Development<br>Kyobutungi, Catherine; African Population and Health Research Center |
| <b>Primary Subject Heading</b>: | Epidemiology                                                                                                                                                                                                                                          |
| Secondary Subject Heading:      | Nutrition and metabolism, Public health                                                                                                                                                                                                               |
| Keywords:                       | EPIDEMIOLOGY, Nutrition < TROPICAL MEDICINE, PUBLIC HEALTH                                                                                                                                                                                            |
|                                 |                                                                                                                                                                                                                                                       |

SCHOLARONE™  
Manuscripts



1  
2  
3 **Correlates of the double burden of malnutrition among women: an analysis of cross sectional**  
4 **survey data from sub-Saharan Africa**  
5  
6  
7

8 Dickson A. Amugsi<sup>1\*</sup>  
9

10 [damugsi2002@yahoo.com](mailto:damugsi2002@yahoo.com); [damugsi@aphrc.org](mailto:damugsi@aphrc.org)  
11

12 Zacharie T. Dimbuene<sup>2, 3</sup>  
13

14 [zacharie.tsala.dimbuene@gmail.com](mailto:zacharie.tsala.dimbuene@gmail.com)  
15

16 Catherine Kyobutungi<sup>1</sup>  
17

18 [ckyobutungi@aphrc.org](mailto:ckyobutungi@aphrc.org)  
19  
20  
21

22 1. African Population and Health Research Center, APHRC Campus, P.O Box 10787-00100,  
23 Nairobi, Kenya  
24

25 2. Department of Population Sciences and Development, University of Kinshasa, Democratic  
26 Republic of the Congo  
27

28 3. Statistics Canada, Social Analysis and Modeling Division, Ottawa, Canada K1A 0T6  
29  
30  
31

32 \* Corresponding author: Dr Dickson A. Amugsi  
33

34 Email: [damugsi2002@yahoo.com](mailto:damugsi2002@yahoo.com); [damugsi@aphrc.org](mailto:damugsi@aphrc.org)  
35  
36  
37

38 Word count: 3725  
39  
40  
41  
42  
43  
44  
45  
46  
47  
48  
49  
50  
51  
52  
53  
54  
55  
56  
57  
58  
59  
60

## Abstract

**Objective:** To investigate the correlates of the double burden of malnutrition (DBM) among women in five sub-Saharan African countries

**Design:** Secondary analysis of Demographic and Health Surveys (DHS). The outcome variable was body mass index (BMI), a measure of DBM. The BMI was classified into underweight (BMI<18.50 kg/m<sup>2</sup>), normal weight (18.50-24.99 kg/m<sup>2</sup>), overweight (25.0-29.9 kg/m<sup>2</sup>) and obesity (≥ 30.0 kg/m<sup>2</sup>).

**Settings:** Ghana, Nigeria, Kenya, Mozambique and Democratic Republic of Congo (DRC).

**Subjects:** Women aged 15-49 years (*n* 64,698).

**Results:** Compared with normal weight women, number of years of formal education was associated with the likelihood of being overweight and obese in Ghana, Mozambique and Nigeria, while associated with the likelihood of being underweight in Kenya and Nigeria. Older age was associated with the likelihood of being underweight, overweight and obese in all countries. Positive associations were also observed between living in better-off households, and overweight and obesity, while a negative association was observed for underweight. Breastfeeding was associated with less likelihood of underweight in DRC and Nigeria, obesity in DRC and Ghana, overweight in Kenya, and overweight and obesity in Mozambique and Nigeria relative to normal weight.

**Conclusions:** Our analysis reveals that in all the countries, women who are breastfeeding are less likely to be underweight, overweight and obese. Education, age and household wealth index tend to associate with a higher likelihood of DBM among women. Interventions to address DBM should take into account the variations in the effects of these correlates.

**Keyword:** Double burden, malnutrition, women, correlates, sub-Saharan Africa

### Strengths and limitations of this study

- Large nationally representative samples used, thereby providing more robust estimates of observed associations
- The height and weight data used to compute the BMI were objectively measured, reducing possible misclassification
- Use of multi-country data helped unmask differences and commonalities in the effects of the correlates on DBM across countries
- The use of cross-sectional surveys may not allow to establish causation
- Due to data limitation, the DBM was examined only at the population or national level

## Introduction

The Double Burden of Malnutrition (DBM), which is the coexistence of both undernutrition and over-nutrition in the same population across the life course is a global public health problem (1, 2). Data from the World Health Organization (WHO) indicate that in 2014, 1.9 billion adults aged 18 years and above were overweight, while over 600 million were obese globally (1). Similarly, in the same year, 462 million adults were underweight and 264 million women of reproductive age were affected by iron-amenable anaemia (2, 3). These key indicators of DBM are also increasing globally, with the low and middle income countries (LMICs) being the most affected (4). For example, while globally, obesity has doubled in the last three decades, it has tripled in LMICs in just two decades (5). An analysis of survey data from 24 African countries spanning 25 years, revealed that overweight and obesity among women are on the rise (6). Also, comparative analysis of data on women and men in the developing countries showed that DBM tends to disproportionately affect women than men (7, 8). The vulnerability of women to DBM may be attributed to their high nutritional requirements for pregnancy and lactation and also because of gender inequalities in poverty (8). Further evidence suggests that if micronutrient deficiencies are taken into account, Africa is in fact experiencing a triple burden of malnutrition (2, 3). It has been estimated that almost 50 percent of pregnant women in Africa suffer from anaemia, which increases the risk of death for themselves as well as their unborn babies (2).

Furthermore, the contribution of DBM to the burden of disease has been documented. The available evidence suggests that underweight and obesity are among the top ten leading risk factors for the global burden of disease (9, 10). Furthermore, more recent WHO data have

1  
2  
3 identified underweight among the top four risks factors for the burden of disease in the world, as  
4  
5 measured in disability-adjusted life years (DALYs)—contributing up to 6% of global DALYs (10). The  
6  
7 relationship between maternal and child weight and the consequences on disease incidence later  
8  
9 in life have also been documented. For example, being overweight as a mother is associated with  
10  
11 overweight and obesity in their offspring (2, 11). Rapid weight gain early in life may predispose to  
12  
13 long-term excessive weight or obesity. And as the evidence suggests, obesity is an important  
14  
15 underlying cause of many non-communicable diseases (NCDs), including hypertension, diabetes,  
16  
17 cancer, stroke, and ischemic heart disease (3, 5, 11). These diseases are responsible for most of  
18  
19 the deaths worldwide, with LMICs disproportionately bearing the brunt, where 80% of the NCD  
20  
21 deaths occur (2-4). Experts warned that unless countries in Africa start enacting measures to tackle  
22  
23 the DBM affecting the continent, the road towards universal health care (UHC) will be marred with  
24  
25 obstacles as will the aspiration to achieve health and wellbeing for all by 2030 (12).  
26  
27  
28  
29  
30  
31  
32  
33  
34  
35

36 It is important to underscore that DBM can exist at the individual, household and population levels  
37  
38 (2). For instance, at the individual level, obesity can occur with deficiency of one or various vitamins  
39  
40 and minerals, or overweight in an adult who was stunted during childhood. At the household level,  
41  
42 a mother may be overweight or anaemic and a child or grandparent is underweight. DBM at the  
43  
44 population level occurs when there is a prevalence of both under- and over-nutrition in the same  
45  
46 community, nation or region (2). Since it will be difficult to determine individual and within  
47  
48 households DBM using these data, our definition of DBM is at population or country level, whereby  
49  
50 underweight and overweight/obesity co-exist in the same country. Undoubtedly, the DBM offers  
51  
52 an important opportunity for use of multidimensional approaches in tackling malnutrition in all its  
53  
54  
55  
56  
57

1  
2  
3 forms. Addressing the DBM will be key to achieving the Sustainable Development Goals (in  
4 particular Goal 2 and Target 3.4) and the Commitments of the Rome Declaration on Nutrition,  
5 within the UN Decade of Action on Nutrition (1). However, as a starting point, countries need to  
6 understand the key correlates of DBM. The present paper attempts to elucidate these correlates.  
7  
8  
9  
10  
11  
12  
13  
14  
15

16 The factors influencing DBM are complex; ranging from biological to environmental factors (2).  
17 Some of these factors may include, poor water and sanitation systems, weak public health systems  
18 thereby thwarting efforts to reduce undernutrition (2). Also, increasing urbanization and changing  
19 dietary patterns and sedentary lifestyles, income level, older age, household wealth, higher  
20 education, place of residence among others have been identified as key contributing factors to the  
21 DBM epidemic (13-16). For example, Kamal and colleagues observed in their study that household  
22 wealth index and place of residence are key predictors of the DBM among women in Bangladesh  
23 (17). Women from the poorest wealth quintile were more likely to suffer from DBM relative to  
24 those from the richest wealth quintile. Besides, marital status, age at first childbirth, parity,  
25 household size and food security were also found to play a critical role in the DBM epidemic (14,  
26 17, 18). The above referenced studies used data from a single country, masking differences and  
27 commonalities of the effects of the correlates on DBM across countries. Suffice to add that  
28 Neupane and colleagues (19) attempted to investigate the problem of DBM using datasets from  
29 32 sub-Saharan African (SSA) countries. This study however fell short of addressing DBM as it  
30 focused only on overweight and obesity. Secondly, the referenced study used only three variables  
31 (wealth quintile, place of residence and education) to predict overweight and obesity. The present  
32 study filled these gaps by simultaneously analysing underweight, overweight and obesity, using a  
33  
34  
35  
36  
37  
38  
39  
40  
41  
42  
43  
44  
45  
46  
47  
48  
49  
50  
51  
52  
53  
54  
55  
56  
57

1  
2  
3 comprehensive list of predictor variables, to provide a robust picture of the correlates of DBM in  
4  
5 SSA.  
6  
7  
8  
9  
10

11 Given the anticipated long-term effects of DBM, the factors that are associated with being  
12  
13 underweight, overweight or obese should be considered while formulating effective interventions  
14  
15 to address DBM among women (15, 16). This stresses the need for prevention strategies targeted  
16  
17 at addressing all forms of malnutrition. The present study is well positioned to provide evidence  
18  
19 on the key correlates of DBM in SSA, which is currently lacking in the region. Understanding the  
20  
21 role of these risk factors is key to developing clear and effective strategies for improving public  
22  
23 health in SSA. The overarching aim of our study is to examine the correlates of DBM among women  
24  
25 in five SSA countries.  
26  
27  
28  
29  
30  
31  
32  
33  
34

## 35 **Methodology**

### 36 ***Sources of data and sampling procedure***

#### 37 *Design and data sources*

38  
39  
40  
41 The study used the recent Demographic and Health Surveys (DHS) (20) data from Ghana (2014),  
42  
43 Kenya (2014), Nigeria (2013), Mozambique (2011) and Democratic Republic of Congo (DRC) (2013-  
44  
45 2014). The selection of these five countries was informed by our previous analysis (21). The DHS  
46  
47 data are nationally representative, repeated cross-sectional household surveys collected primarily  
48  
49 in lower- and middle-income countries approximately every 5 years, using standardized  
50  
51  
52  
53  
54  
55  
56  
57  
58  
59  
60

1  
2  
3 questionnaires to enable cross-country comparisons (22, 23). The design of the DHS surveys is  
4  
5 identical across all participating countries, making possible the comparisons between and across  
6  
7 countries. The DHS utilizes a two-stage sample design (24-28). The first stage involves the selection  
8  
9 of sample points or clusters from an updated master sampling frame constructed from National  
10  
11 Population and Housing Census of the respective countries. The clusters are selected using  
12  
13 systematic sampling with probability proportional to size. Household listing is then conducted in  
14  
15 all the selected clusters to provide a sampling frame for the second stage selection of households.  
16  
17  
18 The second stage of selection involves the systematic sampling of the households listed in each  
19  
20 cluster, and households to be included in the survey are randomly selected from the list. The  
21  
22 rationale for the second stage selection is to ensure adequate numbers of completed individual  
23  
24 interviews to provide estimates for key indicators with an acceptable precision. All men and  
25  
26 women aged 15-59 and 15-49 respectively, in the selected households (men in half of the  
27  
28 households) were eligible to participate in the surveys if they were either usual residents of the  
29  
30 household or visitors present in the household on the night before the survey. We limited our  
31  
32 analyses to women aged 15–49 years in all countries and who have complete anthropometry data.  
33  
34  
35 The samples for the respective countries are as follows: DRC (9,506), Ghana (3,012), Kenya (9,993),  
36  
37  
38 Mozambique (11,017) and Nigeria (31,170).  
39  
40  
41  
42  
43  
44

### 45 **Ethics statement**

46  
47  
48 The DHS obtained ethical clearance from Government recognised Ethical Review  
49  
50 Committees/Institutional Review Boards of the respective countries as well as the Institutional  
51  
52 Review Board of ICF International, USA, before the surveys were conducted. Written informed  
53  
54 consent was obtained from the women before participation. The authors of this paper sought and  
55  
56  
57



1  
2  
3 obtained permission from the DHS program for the use of the data. The data were completely  
4  
5 anonymized and therefore the authors did not seek further ethical clearance before their use.  
6  
7

### 8 **Patient and Public Involvement statement**

9  
10  
11 We used completely anonymised secondary data for the analysis. Therefore, no patients or public  
12  
13 involvement can be reported.  
14  
15

### 16 **Outcome and predictor variables**

17  
18  
19  
20  
21  
22  
23 *Outcome variables:* The outcome variable of interest was women body mass index (BMI) derived  
24  
25 from results of height and weight measurements. The height and weight were measured  
26  
27 objectively by trained field technicians using standard techniques (23). Weight measurements  
28  
29 were taken using electronic Seca scales with a digital screen, while height measurements were  
30  
31 taken using a stadiometer produced by Shorr Productions. BMI, also referred to as Quetelet's Index  
32  
33 (29), was derived by dividing weight in kilograms by the squared height in meters. Based on the  
34  
35 BMI ( $\text{kg}/\text{m}^2$ ) estimates, and according to World Health Organization guidelines (30), the  
36  
37 participants were classified as underweight ( $\text{BMI} < 18.50 \text{ kg}/\text{m}^2$ ), normal weight (18.50-24.99  
38  
39  $\text{kg}/\text{m}^2$ ), overweight (25.0-29.9  $\text{kg}/\text{m}^2$ ) and obese ( $\geq 30.0 \text{ kg}/\text{m}^2$ ). The normal weight (18.50-24.99  
40  
41  $\text{kg}/\text{m}^2$ ) was used as reference category in the analysis.  
42  
43  
44  
45  
46  
47  
48  
49  
50

51  
52 *Predictor variables:* The predictor variables of interest used in the analysis included, women's age,  
53  
54 education, employment status, breastfeeding status, parity, place of residence, marital status,  
55  
56  
57

women decision making autonomy (decision on large household purchases and decision on health), household size, frequency of watching TV and household wealth index. These potential correlates were identified based on literature search and further subjected to bivariate analysis to establish their relationship with the DBM indicators. All statistically significant variables were included in the multivariable analysis.

### Analytical strategy

We utilized Multinomial logistic regression (MLR) in the analysis. MLR approach was contemplated to be suitable as the outcome measure is polychotomous by nature. Further, the MLR was considered attractive analytical technique because it does not assume normality, linearity, or homoscedasticity (31). In MLR, we observe vectors  $Y = (y_1, y_2, \dots, y_{k+1})^T$ ;  $y_i = 0$  for all  $i$ , and one  $j$  with  $y_j = 1$  and corresponding probability  $p_j$ , implying

$$EY = p, \text{Cov } Y = \Lambda_p - pp^T, \quad \Lambda_p = \begin{pmatrix} p_1 & \dots & 0 \\ \vdots & \dots & \vdots \\ 0 & \dots & p_{k+1} \end{pmatrix} \quad (1)$$

The multinomial logistic regression is given by

$$p_i = \frac{\exp(\pi^{(i)T} x)}{1 + \sum_{j=1}^k \exp(\pi^{(j)T} x)} \text{ for } i = 1, \dots, k \quad (2)$$

$$p_{k+1} = \frac{1}{1 + \sum_{j=1}^k \exp(\pi^{(j)T} x)} \quad (3)$$

Where  $x = (x_1, x_2, \dots, x_m)^T$  is the vector of covariates, and  $\pi^{(i)}$  is the parameter vector corresponding to the  $i$ -th response category. In Equation (3), the parameters are set to zero and allows computing the probability for the base category in the MLR.

Because of the normalization condition,

$$\sum_{j=1}^k P(y^{(j)} = 1|x, \pi) = 1, \quad (4)$$

the weight vector of one of the classes need not to be estimated without loss of generality, in this case the  $(j+1)$ -th category. To perform maximum likelihood (ML), one simply maximizes the log-likelihood function using Equation (5),

$$\log \prod_{j=1}^{k+1} p_j^{y_j} = \sum_{j=1}^k y_j \pi^{(j)T} x - \log \left[ 1 + \sum_{j=1}^k \exp(\pi^{(j)T} x) \right] \quad (5)$$

The MLR model was constructed to investigate the net effects of the correlates on underweight, overweight, and obesity. Using a BMI category of 18.5–24.99 kg/m<sup>2</sup> (normal weight) as the reference, a set of logistic regressions for underweight, overweight and obese categories was estimated in which, each of the categories was contrasted with the reference category. All covariates were simultaneously entered into the model. Results were presented in the form of coefficients with significance levels and 95% confidence intervals (95% CI).

## Results

### *Descriptive*

Tables 1 and 2 present the characteristics of the samples. The results in Table 1 show that among the five countries, Mozambique had the highest number of normal weight women (78%) followed by DRC (74%), with Ghana having the lowest (59%). Kenya (12%) and DRC (13%) had the highest prevalence of underweight women, while Ghana had the highest number of overweight (23%) and obese (12%) women. In all the countries analysed, the prevalence of overweight and obesity had overtaken underweight. In Table 2, women in Kenya had more years of education, while Mozambique had women with the least years of education. The age of study participants was

1  
2  
3 similar across all the five countries and ranged from 28 years in Mozambique and Kenya to 30 years  
4  
5 in Ghana. Further, among all the countries, Ghana had the highest number of women who were  
6  
7 working (79%), while Mozambique had the lowest (39%).  
8  
9  
10  
11  
12  
13

14 **Table 1: Characteristics of the BMI samples**

| 15 Variables                       | 16 DRC<br>Mean/% | 17 Ghana<br>Mean/% | 18 Kenya<br>Mean/% | 19 Mozambique<br>Mean/% | 20 Nigeria<br>Mean/% |
|------------------------------------|------------------|--------------------|--------------------|-------------------------|----------------------|
| 21 <b>Body mass index (BMI)</b>    |                  |                    |                    |                         |                      |
| 22 BMI=18.50-24.99 (normal weight) | 23 73.50         | 24 59.20           | 25 62.00           | 26 77.60                | 27 66.10             |
| 28 BMI<18.50 (underweight)         | 29 12.70         | 30 5.30            | 31 11.80           | 32 5.70                 | 33 8.70              |
| 34 BMI= 25-29.99 (overweight)      | 35 11.50         | 36 23.40           | 37 18.90           | 38 13.70                | 39 18.30             |
| 40 BMI>=30 (obesity)               | 41 2.30          | 42 12.20           | 43 7.30            | 44 3.00                 | 45 7.00              |

**Table 2: Characteristics of the samples, categorical and continuous variables**

| Variables                          | DRC    |     | Ghana  |     | Kenya  |     | Mozambique |     | Nigeria |     |
|------------------------------------|--------|-----|--------|-----|--------|-----|------------|-----|---------|-----|
|                                    | Mean/% | SD  | Mean/% | SD  | Mean/% | SD  | Mean/%     | SD  | Mean/%  | SD. |
| Women's Education (in years)       | 5.2    | 3.8 | 6.0    | 4.9 | 7.6    | 4.0 | 3.1        | 3.3 | 4.7     | 5.7 |
| Women's Age (in years)             | 29.2   | 6.8 | 30.6   | 6.8 | 28.6   | 6.4 | 28.6       | 7.3 | 29.4    | 7.0 |
| <b>Household wealth index</b>      |        |     |        |     |        |     |            |     |         |     |
| Poorest                            | 22.4   |     | 22.7   |     | 23.4   |     | 23.6       |     | 23.5    |     |
| Poorer                             | 23.0   |     | 19.8   |     | 20.3   |     | 21.4       |     | 23.1    |     |
| Middle                             | 20.6   |     | 20.6   |     | 18.5   |     | 20.0       |     | 18.9    |     |
| Rich                               | 18.6   |     | 18.7   |     | 18.2   |     | 19.9       |     | 17.8    |     |
| Richest                            | 15.5   |     | 18.2   |     | 19.6   |     | 15.1       |     | 16.8    |     |
| Respondent currently working (yes) | 74.9   |     | 78.8   |     | 63.6   |     | 39.3       |     | 68.9    |     |
| Place of residence (urban)         | 29.9   |     | 45.4   |     | 36.1   |     | 27.5       |     | 35.0    |     |
| Household head (Female)            | 21.6   |     | 26.0   |     | 30.4   |     | 30.3       |     | 9.7     |     |
| Parity                             | 4.4    | 2.6 | 3.6    | 2.1 | 3.5    | 2.3 | 3.9        | 2.3 | 4.3     | 2.6 |
| Household size                     | 6.8    | 2.9 | 5.6    | 2.6 | 5.6    | 2.4 | 6.0        | 2.6 | 7.0     | 3.6 |
| <b>Frequency of watching TV</b>    |        |     |        |     |        |     |            |     |         |     |
| Not at all                         | 66.4   |     | 19.6   |     | 22.0   |     | 34.5       |     | 39.8    |     |
| Less than once a week              | 14.6   |     | 32.7   |     | 12.5   |     | 23.2       |     | 25.0    |     |
| At least once a week               | 19.0   |     | 47.7   |     | 65.5   |     | 42.3       |     | 35.2    |     |
| Currently breastfeeding (yes)      | 68.6   |     | 57.8   |     | 54.0   |     | 60.8       |     | 54.8    |     |
| <b>Marital status</b>              |        |     |        |     |        |     |            |     |         |     |

|    |                                                     |      |      |      |      |      |
|----|-----------------------------------------------------|------|------|------|------|------|
| 3  | Never Married                                       | 4.3  | 7.1  | 7.1  | 4.2  | 1.6  |
| 4  | Married or Cohabiting                               | 87.2 | 86.5 | 83.7 | 84.3 | 95.9 |
| 5  | Formerly in union                                   | 8.5  | 6.4  | 9.2  | 11.5 | 2.6  |
| 7  | <b><i>Decision on large household purchases</i></b> |      |      |      |      |      |
| 8  | Respondent alone                                    | 8.7  | 20.8 | 29.1 | 17.2 | 4.7  |
| 9  | Both Respondent and partner                         | 31.0 | 42.7 | 34.2 | 39.1 | 29.2 |
| 10 | Partner alone                                       | 47.3 | 22.2 | 20.1 | 27.5 | 61.6 |
| 11 | Someone else/Other                                  | 0.2  | 0.9  | 0.4  | 0.6  | 0.2  |
| 13 | <b><i>Decision on respondent's health</i></b>       |      |      |      |      |      |
| 14 | Respondent alone                                    | 13.8 | 16.3 | 14.7 | 10.0 | 4.3  |
| 15 | Both Respondent and partner                         | 37.2 | 44.8 | 42.2 | 38.2 | 28.4 |
| 16 | Partner alone                                       | 35.6 | 24.4 | 26.3 | 35.4 | 62.8 |
| 17 | Someone else/Other                                  | 0.3  | 1.0  | 0.4  | 0.7  | 0.2  |

SD=Standard deviation; DRC=Democratic Republic of Congo

### *Multivariable*

Tables 3-7 present the MLR results of the correlates of DBM among women in DRC, Ghana, Kenya, Mozambique and Nigeria. The results showed a significant positive relationship between women's years' of education and overweight in Ghana, both overweight and obesity in Mozambique and Nigeria. Thus, compared with normal weight women, an additional year of education was associated with a higher likelihood of overweight and obesity in Ghana, Mozambique and Nigeria. Conversely, number of years of education was associated negatively with underweight in Kenya and Nigeria relative to normal weight. Also, older age was significantly and positively associated with underweight, overweight and obesity compared to normal weight women in all countries included in the analysis. An exception could be made of Nigeria where older age was inversely related to underweight. The results in relation to household wealth index were mixed. While generally, significant positive associations were observed between wealth index (middle, richer and richest quintiles) and overweight and obesity in all the five countries, inverse relationship was observed for underweight. Compared to normal weight women, higher maternal parity was inversely related to underweight in Ghana and Mozambique, and both underweight and overweight in Kenya. In DRC, maternal parity was inversely related to underweight and positively related to obesity. Breastfeeding was associated with less likelihood of underweight among women in DRC and Nigeria, obesity in DRC and Ghana, overweight in Kenya, and overweight and obesity in Mozambique and Nigeria relative to normal weight women.

**Table 3: Multivariable analysis of the association between sociodemographic correlates and malnutrition, DRC**

| Variables                                    | Underweight<br>(BMI<18.50)     | Overweight<br>(BMI=25-29.99)   | Obesity<br>(BMI >=30)         |
|----------------------------------------------|--------------------------------|--------------------------------|-------------------------------|
| Women's Education (in years)                 | 0.030*<br>(-0.004 - 0.064)     | -0.011<br>(-0.052 - 0.030)     | -0.023<br>(-0.093 - 0.047)    |
| Women's Age (in years)                       | 0.041***<br>(0.015 - 0.068)    | 0.034**<br>(0.007 - 0.060)     | -0.045<br>(-0.104 - 0.015)    |
| <b>Household wealth Index</b>                |                                |                                |                               |
| Poorest (reference)                          |                                |                                |                               |
| Poorer                                       | -0.009<br>(-0.306 - 0.288)     | -0.069<br>(-0.488 - 0.351)     | -0.241<br>(-1.575 - 1.094)    |
| Middle                                       | -0.144<br>(-0.534 - 0.247)     | 0.421**<br>(0.039 - 0.804)     | 0.570<br>(-0.529 - 1.669)     |
| Rich                                         | -0.480**<br>(-0.942 - -0.018)  | 0.803*<br>(0.345 - 1.261)      | 2.365***<br>(1.225 - 3.505)   |
| Richest                                      | -1.017***<br>(-1.564 - -0.471) | 1.486*<br>(0.985 - 1.987)      | 4.014***<br>(2.562 - 5.465)   |
| Woman currently working (yes)                | 0.226<br>(-0.052 - 0.504)      | -0.462***<br>(-0.794 - -0.131) | -0.350<br>(-0.850 - 0.149)    |
| Place of residence (urban)                   | -0.246<br>(-0.601 - 0.108)     | 0.034<br>(-0.350 - 0.417)      | -0.094<br>(-0.810 - 0.622)    |
| Sex of household head (female)               | -0.0453<br>(-0.377 - 0.286)    | 0.167<br>(-0.144 - 0.478)      | 0.363<br>(-0.380 - 1.105)     |
| Parity                                       | -0.122***<br>(-0.199 - -0.045) | 0.0335<br>(-0.040 - 0.107)     | 0.350***<br>(0.174 - 0.525)   |
| Household size                               | -0.019<br>(-0.066 - 0.028)     | -0.008<br>(-0.048 - 0.031)     | -0.052<br>(-0.158 - 0.056)    |
| <b>Frequency of watching TV</b>              |                                |                                |                               |
| Not at all (reference)                       |                                |                                |                               |
| Less than once a week                        | 0.089<br>(-0.251 - 0.429)      | 0.165<br>(-0.192 - 0.522)      | -0.209<br>(-0.912 - 0.494)    |
| At least once a week                         | -0.163<br>(-0.623 - 0.298)     | 0.180<br>(-0.140 - 0.500)      | 0.149<br>(-0.373 - 0.671)     |
| Currently breastfeeding                      | 0.327***<br>(0.082 - 0.572)    | -0.010<br>(-0.361 - 0.164)     | -0.512**<br>(-1.020 - -0.005) |
| <b>Marital status</b>                        |                                |                                |                               |
| Never in union (reference)                   |                                |                                |                               |
| Married or Cohabiting                        | -0.766*<br>(-1.567 - 0.0347)   | 0.809*<br>(0.132 - 1.486)      | 0.248<br>(-1.131 - 1.626)     |
| Formerly in union                            | -0.357<br>(-1.126 - 0.413)     | 0.0680<br>(-0.583 - 0.718)     | -0.549<br>(-1.956 - 0.859)    |
| <b>Decision on large household purchases</b> |                                |                                |                               |
| Respondent alone (reference)                 |                                |                                |                               |
| Both Respondent and partner                  | 0.186                          | 0.155                          | 0.885*                        |



|    |                                          |                  |                   |                     |
|----|------------------------------------------|------------------|-------------------|---------------------|
| 1  |                                          |                  |                   |                     |
| 2  |                                          |                  |                   |                     |
| 3  |                                          | (-0.292 - 0.664) | (-0.291 - 0.601)  | (-0.154 - 1.923)    |
| 4  | Partner alone                            | 0.436*           | 0.098             | 0.423               |
| 5  |                                          | (-0.059 - 0.931) | (-0.325 - 0.522)  | (-0.370 - 1.215)    |
| 6  | Someone else/Other                       | -0.787           | -3.160***         | -12.640***          |
| 7  |                                          | (-2.567 - 0.993) | (-5.513 - -0.808) | (-14.160 - -11.130) |
| 8  | <b>Decision on respondent's health</b>   |                  |                   |                     |
| 9  |                                          |                  |                   |                     |
| 10 | Respondent alone (reference)             |                  |                   |                     |
| 11 | Both Respondent and partner              | -0.180           | -0.332            | -0.743*             |
| 12 |                                          | (-0.599 - 0.239) | (-0.731 - 0.067)  | (-1.594 - 0.109)    |
| 13 | Partner alone                            | -0.176           | -0.525**          | -0.602*             |
| 14 |                                          | (-0.552 - 0.201) | (-0.933 - -0.116) | (-1.282 - 0.078)    |
| 15 | Someone else/Other                       | 1.672**          | 0.687             | -14.200***          |
| 16 |                                          | (0.073 - 3.272)  | (-1.990 - 3.363)  | (-15.970 - -12.430) |
| 17 |                                          |                  |                   |                     |
| 18 |                                          |                  |                   |                     |
| 19 | Observations                             | 9,506            | 9,506             | 9,506               |
| 20 | Confidence Intervals (CI) in parentheses |                  |                   |                     |
| 21 | *** p<0.01, ** p<0.05, * p<0.1           |                  |                   |                     |
| 22 |                                          |                  |                   |                     |
| 23 |                                          |                  |                   |                     |
| 24 |                                          |                  |                   |                     |
| 25 |                                          |                  |                   |                     |

**Table 4: Multivariable analysis of the association between sociodemographic correlates and malnutrition, Ghana**

| Variables                      | Underweight<br>BMI<18.50       | Overweight<br>BMI=25-29.99  | Obesity<br>BMI>= 30         |
|--------------------------------|--------------------------------|-----------------------------|-----------------------------|
| Women's Education (in years)   | -0.022<br>(-0.080 - 0.036)     | 0.074***<br>(0.037 - 0.110) | 0.028<br>(-0.014 - 0.070)   |
| Women's Age (in years)         | 0.054**<br>(0.005 - 0.103)     | 0.0405**<br>(0.008 - 0.073) | 0.083***<br>(0.048 - 0.118) |
| <b>Household wealth index</b>  |                                |                             |                             |
| Poorest (reference)            |                                |                             |                             |
| Poorer                         | -0.398<br>(-0.972 - 0.177)     | 0.367<br>(-0.129 - 0.864)   | 1.390***<br>(0.582 - 2.197) |
| Middle                         | -1.050***<br>(-1.768 - -0.331) | 0.893*<br>(0.340 - 1.447)   | 2.804***<br>(1.947 - 3.662) |
| Rich                           | -0.529<br>(-1.426 - 0.369)     | 1.436*<br>(0.878 - 1.995)   | 3.591***<br>(2.615 - 4.568) |
| Richest                        | -1.788***<br>(-3.052 - -0.523) | 1.271*<br>(0.555 - 1.988)   | 4.121***<br>(3.125 - 5.117) |
| Woman currently working (yes)  | -0.125<br>(-0.713 - 0.463)     | 0.121<br>(-0.238 - 0.481)   | 0.0769<br>(-0.424 - 0.577)  |
| Place of residence (urban)     | 0.463*<br>(-0.0488 - 0.975)    | 0.113<br>(-0.250 - 0.477)   | -0.073<br>(-0.582 - 0.435)  |
| Sex of household head (female) | 0.409<br>(-0.276 - 1.093)      | 0.0971<br>(-0.309 - 0.503)  | 0.293<br>(-0.173 - 0.759)   |
| Parity                         | -0.205**<br>(-0.372 - -0.038)  | 0.0719<br>(-0.055 - 0.199)  | 0.0324<br>(-0.118 - 0.183)  |
| Household size                 | 0.021                          | -0.047                      | 0.035                       |

|                                              |                            |                             |                                |
|----------------------------------------------|----------------------------|-----------------------------|--------------------------------|
|                                              | (-0.045 - 0.086)           | (-0.121 - 0.027)            | (-0.077 - 0.147)               |
| <b>Frequency of watching TV</b>              |                            |                             |                                |
| Not at all (reference)                       |                            |                             |                                |
| Less than once a week                        | -0.043<br>(-0.604 - 0.518) | 0.231<br>(-0.240 - 0.703)   | 0.673*<br>(0.0003 - 1.345)     |
| At least once a week                         | -0.233<br>(-0.754 - 0.287) | 0.248<br>(-0.184 - 0.679)   | 0.756**<br>(0.146 - 1.365)     |
| Currently breastfeeding (yes)                | 0.136<br>(-0.364 - 0.637)  | -0.177<br>(-0.525 - 0.171)  | -0.471**<br>(-0.832 - -0.110)  |
| <b>Marital status</b>                        |                            |                             |                                |
| Never in union (reference)                   |                            |                             |                                |
| Married or Cohabiting                        | -0.536<br>(-1.843 - 0.772) | -0.259<br>(-0.904 - 0.386)  | 0.295<br>(-0.860 - 1.451)      |
| Formerly in union                            | 0.271<br>(-0.837 - 1.378)  | 0.420<br>(-0.286 - 1.126)   | 1.435*<br>(0.400 - 2.470)      |
| <b>Decision on large household purchases</b> |                            |                             |                                |
| Respondent alone (reference)                 |                            |                             |                                |
| Both Respondent and partner                  | 0.464<br>(-0.555 - 1.483)  | -0.0143<br>(-0.523 - 0.495) | -0.0496<br>(-0.657 - 0.557)    |
| Partner alone                                | 0.664<br>(-0.217 - 1.546)  | -0.0223<br>(-0.556 - 0.512) | -0.265<br>(-0.917 - 0.386)     |
| Someone else/Other                           | -1.212<br>(-3.637 - 1.213) | -0.0290<br>(-1.485 - 1.426) | 0.752<br>(-1.161 - 2.665)      |
| <b>Decision on respondent's health</b>       |                            |                             |                                |
| Respondent alone (reference)                 |                            |                             |                                |
| Both Respondent and partner                  | 0.0525<br>(-0.868 - 0.973) | 0.785*<br>(0.280 - 1.290)   | 0.787*<br>(0.166 - 1.408)      |
| Partner alone                                | 0.119<br>(-0.643 - 0.881)  | 0.526*<br>(-0.0457 - 1.098) | 0.915*<br>(0.156 - 1.675)      |
| Someone else/Other                           | -0.714<br>(-2.832 - 1.403) | -1.544<br>(-3.520 - 0.433)  | -13.43***<br>(-15.04 - -11.81) |
| Observations                                 | 3,012                      | 3,012                       | 3,012                          |

Confident Intervals (CI) in parentheses

\*\*\* p<0.01, \*\* p<0.05, \* p<0.1

**Table 5: Multivariable analysis of the association between sociodemographic correlates and malnutrition, Kenya**

| Variables                    | Underweight<br>(BMI<18.50)     | Overweight<br>(BMI=25.29.99) | Obesity<br>(BMI>=30)      |
|------------------------------|--------------------------------|------------------------------|---------------------------|
| Women's Education (in years) | -0.113***<br>(-0.148 - -0.078) | 0.013<br>(-0.016 - 0.042)    | 0.013<br>(-0.030 - 0.056) |

|    |                                              |                   |                   |                     |
|----|----------------------------------------------|-------------------|-------------------|---------------------|
| 1  |                                              |                   |                   |                     |
| 2  |                                              |                   |                   |                     |
| 3  | Women's Age (in years)                       | 0.026**           | 0.066***          | 0.120***            |
| 4  |                                              | (0.001 - 0.052)   | (0.046 - 0.089)   | (0.087 - 0.153)     |
| 5  | <b>Household wealth index</b>                |                   |                   |                     |
| 6  |                                              |                   |                   |                     |
| 7  | Poorest (reference)                          |                   |                   |                     |
| 8  | Poorer                                       | -0.488***         | 0.279*            | 0.633*              |
| 9  |                                              | (-0.805 - -0.172) | (-0.025 - 0.582)  | (0.080 - 1.187)     |
| 10 | Middle                                       | -0.500***         | 0.609***          | 0.790*              |
| 11 |                                              | (-0.869 - -0.130) | (0.261 - 0.957)   | (0.268 - 1.311)     |
| 12 | Rich                                         | -0.940***         | 0.927*            | 1.690***            |
| 13 |                                              | (-1.376 - -0.504) | (0.578 - 1.276)   | (1.164 - 2.216)     |
| 14 | Richest                                      | -1.307***         | 1.427***          | 2.616***            |
| 15 |                                              | (-1.946 - -0.668) | (1.042 - 1.813)   | (2.049 - 3.184)     |
| 16 | Woman currently working (yes)                | -0.357***         | 0.0162            | 0.210               |
| 17 |                                              | (-0.590 - -0.123) | (-0.221 - 0.253)  | (-0.110 - 0.529)    |
| 18 | Place of residents (urban)                   | 0.0337            | 0.107             | 0.497***            |
| 19 |                                              | (-0.272 - 0.339)  | (-0.115 - 0.330)  | (0.177 - 0.817)     |
| 20 | Sex of household head (female)               | 0.230             | 0.0205            | -0.0346             |
| 21 |                                              | (-0.0570 - 0.518) | (-0.177 - 0.218)  | (-0.336 - 0.267)    |
| 22 | Parity                                       | -0.164***         | -0.118***         | -0.084              |
| 23 |                                              | (-0.243 - -0.085) | (-0.190 - -0.046) | (-0.199 - 0.030)    |
| 24 | Household size                               | -0.035            | 0.013             | 0.034               |
| 25 |                                              | (-0.089 - 0.019)  | (-0.034 - 0.061)  | (-0.044 - 0.111)    |
| 26 |                                              |                   |                   |                     |
| 27 | <b>Frequency of watching TV</b>              |                   |                   |                     |
| 28 | Not at all                                   |                   |                   |                     |
| 29 | Less than once a week                        | -0.539***         | 0.076             | -0.131              |
| 30 |                                              | (-0.905 - -0.174) | (-0.295 - 0.447)  | (-0.700 - 0.439)    |
| 31 | At least once a week                         | -0.066            | 0.043             | 0.035               |
| 32 |                                              | (-0.355 - 0.223)  | (-0.194 - 0.281)  | (-0.357 - 0.426)    |
| 33 | Currently breastfeeding (yes)                | 0.102             | -0.156*           | -0.204              |
| 34 |                                              | (-0.112 - 0.316)  | (-0.338 - 0.026)  | (-0.510 - 0.102)    |
| 35 |                                              |                   |                   |                     |
| 36 | <b>Marital status</b>                        |                   |                   |                     |
| 37 | Never in union (reference)                   |                   |                   |                     |
| 38 | Married or Cohabiting                        | 0.299             | 0.870*            | 0.898*              |
| 39 |                                              | (-0.197 - 0.794)  | (0.422 - 1.317)   | (0.212 - 1.584)     |
| 40 | Formerly in union                            | 0.209             | 0.488**           | 0.312               |
| 41 |                                              | (-0.339 - 0.756)  | (0.047 - 0.929)   | (-0.392 - 1.017)    |
| 42 |                                              |                   |                   |                     |
| 43 | <b>Decision on household large purchases</b> |                   |                   |                     |
| 44 | Respondent alone (reference)                 |                   |                   |                     |
| 45 | Both Respondent and partner                  | -0.217            | -0.303**          | 0.0495              |
| 46 |                                              | (-0.546 - 0.113)  | (-0.543 - -0.063) | (-0.259 - 0.358)    |
| 47 | Partner alone                                | -0.298*           | -0.0677           | -0.128              |
| 48 |                                              | (-0.641 - 0.045)  | (-0.350 - 0.215)  | (-0.528 - 0.273)    |
| 49 | Someone else/Other                           | -2.309***         | -0.970            | -13.66***           |
| 50 |                                              | (-4.053 - -0.565) | (-3.170 - 1.231)  | (-14.580 - -12.730) |
| 51 |                                              |                   |                   |                     |
| 52 | <b>Decision on respondent's health</b>       |                   |                   |                     |
| 53 | Respondent alone (reference)                 |                   |                   |                     |
| 54 |                                              |                   |                   |                     |
| 55 |                                              |                   |                   |                     |
| 56 |                                              |                   |                   |                     |
| 57 |                                              |                   |                   |                     |
| 58 |                                              |                   |                   |                     |
| 59 |                                              |                   |                   |                     |
| 60 |                                              |                   |                   |                     |

|                             |                                |                            |                                   |
|-----------------------------|--------------------------------|----------------------------|-----------------------------------|
| Both Respondent and partner | -0.0559<br>(-0.427 - 0.315)    | 0.0704<br>(-0.194 - 0.335) | -0.131<br>(-0.524 - 0.262)        |
| Partner alone               | -0.220<br>(-0.601 - 0.161)     | -0.016<br>(-0.301 - 0.268) | -0.183<br>(-0.633 - 0.266)        |
| Someone else/Other          | -2.446***<br>(-4.226 - -0.666) | 0.092<br>(-2.677 - 2.862)  | -12.920***<br>(-14.610 - -11.230) |
| Observations                | 9,993                          | 9,993                      | 9,993                             |

Confidence Intervals (CI) in parentheses

\*\*\* p<0.01, \*\* p<0.05, \* p<0.1

**Table 6: Multivariable analysis of the association between sociodemographic correlates and malnutrition, Mozambique**

| Variables                       | Underweight<br>(BMI<18.50)     | Overweight<br>(BMI=25-29.99)   | Obesity<br>(BMI>=30)           |
|---------------------------------|--------------------------------|--------------------------------|--------------------------------|
| Women's Education (yes)         | 0.011<br>(-0.041 - 0.063)      | 0.044***<br>(0.0127 - 0.076)   | 0.098***<br>(0.041 - 0.156)    |
| Women's Age (in years)          | 0.018<br>(-0.013 - 0.049)      | 0.032***<br>(0.012 - 0.052)    | 0.075***<br>(0.042 - 0.109)    |
| <b>Household Wealth index</b>   |                                |                                |                                |
| Poorest (reference)             |                                |                                |                                |
| Poorer                          | -0.146<br>(-0.479 - 0.187)     | 0.618*<br>(0.222 - 1.015)      | 1.061<br>(-0.529 - 2.650)      |
| Middle                          | -0.741***<br>(-1.118 - -0.365) | 0.856*<br>(0.430 - 1.282)      | 2.424***<br>(1.023 - 3.825)    |
| Rich                            | -0.618***<br>(-1.081 - -0.154) | 1.235*<br>(0.818 - 1.652)      | 2.905***<br>(1.576 - 4.234)    |
| Richest                         | -0.800***<br>(-1.408 - -0.192) | 1.977***<br>(1.517 - 2.437)    | 4.832***<br>(3.496 - 6.168)    |
| Woman currently working (yes)   | 0.195<br>(-0.087 - 0.477)      | -0.0795<br>(-0.271 - 0.112)    | 0.014<br>(-0.371 - 0.400)      |
| Place of residence (urban)      | 0.0766<br>(-0.306 - 0.459)     | -0.0722<br>(-0.350 - 0.205)    | -0.0180<br>(-0.504 - 0.468)    |
| Sex of household head (female)  | -0.342**<br>(-0.649 - -0.036)  | -0.056<br>(-0.264 - 0.153)     | -0.142<br>(-0.570 - 0.286)     |
| Parity                          | -0.124**<br>(-0.224 - -0.023)  | 0.0379<br>(-0.024 - 0.100)     | 0.160**<br>(0.037 - 0.282)     |
| Household size                  | 0.0161<br>(-0.037 - 0.070)     | -0.010<br>(-0.042 - 0.022)     | -0.037<br>(-0.108 - 0.035)     |
| <b>Frequency of watching TV</b> |                                |                                |                                |
| Not at all (reference)          |                                |                                |                                |
| Less than once a week           | -0.0113<br>(-0.328 - 0.306)    | 0.157<br>(-0.091 - 0.404)      | 0.630***<br>(0.214 - 1.047)    |
| At least once a week            | -0.214<br>(-0.518 - 0.0895)    | -0.0124<br>(-0.213 - 0.188)    | 0.044<br>(-0.329 - 0.418)      |
| Currently breastfeeding         | 0.215<br>(-0.049 - 0.478)      | -0.298***<br>(-0.493 - -0.102) | -0.516**<br>(-0.938 - -0.0944) |

|    |                                              |                  |                  |                   |
|----|----------------------------------------------|------------------|------------------|-------------------|
| 1  |                                              |                  |                  |                   |
| 2  |                                              |                  |                  |                   |
| 3  | <b>Marital status</b>                        |                  |                  |                   |
| 4  | Never in union (reference)                   |                  |                  |                   |
| 5  | Married or Cohabiting                        | 0.253            | 0.196            | 0.708*            |
| 6  |                                              | (-0.419 - 0.925) | (-0.223 - 0.615) | (-0.0469 - 1.462) |
| 7  | Formerly in union                            | 0.351            | -0.029           | 0.773**           |
| 8  |                                              | (-0.288 - 0.989) | (-0.462 - 0.404) | (0.0197 - 1.527)  |
| 9  |                                              |                  |                  |                   |
| 10 | <b>Decision on large household purchases</b> |                  |                  |                   |
| 11 | Respondent alone (reference)                 |                  |                  |                   |
| 12 | Both Respondent and partner                  | -0.096           | -0.0634          | -0.0414           |
| 13 |                                              | (-0.472 - 0.281) | (-0.329 - 0.202) | (-0.647 - 0.564)  |
| 14 | Partner alone                                | -0.049           | 0.037            | -0.366            |
| 15 |                                              | (-0.420 - 0.323) | (-0.256 - 0.329) | (-1.022 - 0.289)  |
| 16 | Someone else/Other                           | 0.036            | 0.746            | -0.983            |
| 17 |                                              | (-1.044 - 1.115) | (-0.600 - 2.091) | (-3.268 - 1.303)  |
| 18 |                                              |                  |                  |                   |
| 19 | <b>Decision on respondent's health</b>       |                  |                  |                   |
| 20 | Respondent alone (reference)                 |                  |                  |                   |
| 21 | Both Respondent and partner                  | -0.184           | -0.134           | -0.143            |
| 22 |                                              | (-0.633 - 0.265) | (-0.425 - 0.158) | (-0.777 - 0.491)  |
| 23 | Partner alone                                | -0.317           | -0.148           | 0.227             |
| 24 |                                              | (-0.786 - 0.151) | (-0.440 - 0.144) | (-0.360 - 0.814)  |
| 25 | Someone else/Other                           | -0.480           | -0.646           | -1.232            |
| 26 |                                              | (-1.477 - 0.516) | (-1.649 - 0.357) | (-3.319 - 0.855)  |
| 27 |                                              |                  |                  |                   |
| 28 |                                              |                  |                  |                   |
| 29 | Observations                                 | 11,017           | 11,017           | 11,017            |
| 30 | Confidence Intervals (CI) in parentheses     |                  |                  |                   |
| 31 | *** p<0.01, ** p<0.05, * p<0.1               |                  |                  |                   |
| 32 |                                              |                  |                  |                   |
| 33 |                                              |                  |                  |                   |
| 34 |                                              |                  |                  |                   |
| 35 |                                              |                  |                  |                   |
| 36 |                                              |                  |                  |                   |
| 37 |                                              |                  |                  |                   |
| 38 |                                              |                  |                  |                   |
| 39 |                                              |                  |                  |                   |
| 40 |                                              |                  |                  |                   |
| 41 |                                              |                  |                  |                   |
| 42 |                                              |                  |                  |                   |
| 43 |                                              |                  |                  |                   |
| 44 |                                              |                  |                  |                   |
| 45 |                                              |                  |                  |                   |
| 46 |                                              |                  |                  |                   |
| 47 |                                              |                  |                  |                   |
| 48 |                                              |                  |                  |                   |
| 49 |                                              |                  |                  |                   |
| 50 |                                              |                  |                  |                   |
| 51 |                                              |                  |                  |                   |
| 52 |                                              |                  |                  |                   |
| 53 |                                              |                  |                  |                   |
| 54 |                                              |                  |                  |                   |
| 55 |                                              |                  |                  |                   |
| 56 |                                              |                  |                  |                   |
| 57 |                                              |                  |                  |                   |
| 58 |                                              |                  |                  |                   |
| 59 |                                              |                  |                  |                   |
| 60 |                                              |                  |                  |                   |

**Table 7: Multivariable analysis of the association between sociodemographic correlates and malnutrition, Nigeria**

| Variable                      | Underweight<br>(BMI<18.50)     | Overweight<br>(BMI=25-29.99) | Obesity<br>(BMI>=30)        |
|-------------------------------|--------------------------------|------------------------------|-----------------------------|
| Women's Education (in years)  | -0.042***<br>(-0.067 - -0.018) | 0.034***<br>(0.019 - 0.049)  | 0.048***<br>(0.028 - 0.068) |
| Women's Age (in years)        | -0.019**<br>(-0.035 - -0.0021) | 0.040***<br>(0.030 - 0.051)  | 0.072***<br>(0.056 - 0.088) |
| <b>Household wealth index</b> |                                |                              |                             |
| Poorest (reference)           |                                |                              |                             |
| Poorer                        | -0.200**<br>(-0.366 - -0.034)  | 0.289***<br>(0.090 - 0.488)  | 0.208<br>(-0.280 - 0.697)   |
| Middle                        | -0.291**<br>(-0.517 - -0.0650) | 0.691***<br>(0.479 - 0.903)  | 0.788*<br>(0.298 - 1.278)   |
| Rich                          | -0.208<br>(-0.477 - 0.0614)    | 0.998*<br>(0.764 - 1.232)    | 1.196*<br>(0.694 - 1.698)   |
| Richest                       | -0.530***<br>(-0.921 - -0.139) | 1.351***<br>(1.074 - 1.628)  | 1.862***<br>(1.353 - 2.372) |

|    |                                              |                    |                    |                    |
|----|----------------------------------------------|--------------------|--------------------|--------------------|
| 1  |                                              |                    |                    |                    |
| 2  |                                              |                    |                    |                    |
| 3  | Woman currently working (yes)                | -0.0518            | 0.0231             | -0.292***          |
| 4  |                                              | (-0.198 - 0.0944)  | (-0.102 - 0.148)   | (-0.497 - -0.0878) |
| 5  | Place of residence (urban)                   | 0.166              | 0.0775             | 0.178*             |
| 6  |                                              | (-0.0500 - 0.381)  | (-0.0643 - 0.219)  | (-0.0244 - 0.379)  |
| 7  | Sex of household head (female)               | -0.0836            | 0.0127             | -0.084             |
| 8  |                                              | (-0.336 - 0.169)   | (-0.149 - 0.174)   | (-0.300 - 0.133)   |
| 9  | Parity                                       | -0.011             | 0.039**            | 0.0230             |
| 10 |                                              | (-0.0538 - 0.0313) | (0.009 - 0.0698)   | (-0.021 - 0.067)   |
| 11 | Household size                               | 0.007              | -0.009             | 0.023*             |
| 12 |                                              | (-0.015 - 0.029)   | (-0.025 - 0.00654) | (-0.002 - 0.047)   |
| 13 |                                              |                    |                    |                    |
| 14 | <b>Frequency of watching TV</b>              |                    |                    |                    |
| 15 |                                              |                    |                    |                    |
| 16 | Not at all (reference)                       |                    |                    |                    |
| 17 | Less than once a week                        | -0.146             | 0.0771             | 0.0585             |
| 18 |                                              | (-0.336 - 0.045)   | (-0.056 - 0.210)   | (-0.162 - 0.278)   |
| 19 | At least once a week                         | -0.252***          | 0.155**            | 0.205*             |
| 20 |                                              | (-0.438 - -0.066)  | (0.024 - 0.285)    | (-0.009 - 0.420)   |
| 21 | Currently breastfeeding                      | 0.178***           | -0.176***          | -0.363***          |
| 22 |                                              | (0.043 - 0.314)    | (-0.278 - -0.073)  | (-0.524 - -0.202)  |
| 23 |                                              |                    |                    |                    |
| 24 | <b>Marital status</b>                        |                    |                    |                    |
| 25 |                                              |                    |                    |                    |
| 26 | Never in union                               |                    |                    |                    |
| 27 | Married or Cohabiting                        | -0.177             | 0.633*             | 0.557*             |
| 28 |                                              | (-0.652 - 0.299)   | (0.188 - 1.078)    | (-0.090 - 1.204)   |
| 29 | Formerly in union                            | 0.0721             | 0.921*             | 1.071*             |
| 30 |                                              | (-0.400 - 0.545)   | (0.426 - 1.416)    | (0.417 - 1.724)    |
| 31 |                                              |                    |                    |                    |
| 32 | <b>Decision on large household purchases</b> |                    |                    |                    |
| 33 |                                              |                    |                    |                    |
| 34 | Respondent alone                             |                    |                    |                    |
| 35 | Both Respondent and partner                  | -0.206             | 0.0218             | 0.341*             |
| 36 |                                              | (-0.641 - 0.230)   | (-0.209 - 0.252)   | (-0.002 - 0.684)   |
| 37 | Partner alone                                | -0.181             | -0.015             | -0.177             |
| 38 |                                              | (-0.579 - 0.218)   | (-0.238 - 0.209)   | (-0.538 - 0.184)   |
| 39 | Someone else/Other                           | 1.314*             | -0.651             | -0.225             |
| 40 |                                              | (-0.239 - 2.866)   | (-1.912 - 0.609)   | (-1.731 - 1.281)   |
| 41 |                                              |                    |                    |                    |
| 42 | <b>Decision on respondent's health</b>       |                    |                    |                    |
| 43 |                                              |                    |                    |                    |
| 44 | Respondent alone (reference)                 |                    |                    |                    |
| 45 | Both Respondent and partner                  | -0.0847            | -0.0141            | -0.192             |
| 46 |                                              | (-0.525 - 0.356)   | (-0.251 - 0.223)   | (-0.547 - 0.163)   |
| 47 | Partner alone                                | 0.069              | 0.025              | -0.088             |
| 48 |                                              | (-0.334 - 0.474)   | (-0.206 - 0.256)   | (-0.460 - 0.283)   |
| 49 | Someone else/Other                           | -2.381***          | -1.369**           | -2.604**           |
| 50 |                                              | (-1.417 - -0.423)  | (-4.688 - -3.669)  | (-7.160 - -5.311)  |
| 51 | Observations                                 | 31,170             | 31,170             | 31,170             |

Confidence Intervals (CI) in parentheses

\*\*\* p<0.01, \*\* p<0.05, \* p<0.1

1  
2  
3 The figures 1 and 2 are pictorial presentations of the probability of women falling into underweight,  
4  
5 overweight and obese categories if there were changes in their age and years of education.  
6  
7

8 **Figure 1: Graphical Illustration of the results of the probability of falling into the DBM**  
9 **categories when years of education increase**  
10  
11  
12  
13  
14  
15  
16  
17

18 **Figure 2: Graphical Illustration of results of the probability of falling into the DBM categories**  
19 **when age increases**  
20  
21  
22  
23

## 24 Discussion

25  
26  
27 This study investigated the correlates of DBM among women in five sub-Saharan African (SSA)  
28 countries. The key indicators of DBM used in the analysis were, underweight, overweight and  
29 obesity. The results showed expectedly that there are some variations across countries on how the  
30 correlates included in this study are associated with DBM. Our analysis reveals that in Ghana,  
31 Mozambique and Nigeria, a higher number of years of formal education is associated with the  
32 likelihood of overweight and obesity relative to normal weight women. Thus, a higher number of  
33 years of education is a risk factor for women with unhealthy weight. This could be due to lifestyles  
34 changes as one achieve more years of education, which may include sedentary lifestyles and poor  
35 dietary patterns (32). Further, it could be that people who are already overweight or obese have  
36 higher propensity of adding more weight relative to those who have normal weight. In contrast,  
37 there was an inverse relationship between the number of years of formal education and  
38 underweight in Kenya and Nigeria. These findings are in line with previous studies. In Ghana, higher  
39  
40  
41  
42  
43  
44  
45  
46  
47  
48  
49  
50  
51  
52  
53  
54  
55  
56  
57  
58  
59  
60

1  
2  
3 education was associated with overweight and obesity among women (33). Additionally, high  
4  
5 education was associated positively with overweight among women in Indonesia (34).  
6  
7 Nevertheless, in the same study, high education was associated with reduced risk of being  
8  
9 underweight by 10–30% (34). This is contrary to our findings in Kenya and Nigeria.  
10  
11  
12  
13  
14  
15

16 Furthermore, age was associated positively with all the DBM indicators across the five countries.  
17  
18 Thus, older women are more likely to be overweight and obese and less likely to be underweight.  
19  
20 This suggests that older age is a protective factor for underweight, while a risk factor for  
21  
22 overweight and obesity. This positive correlation between age, and overweight and obesity, may  
23  
24 have a consequential effect on non-communicable diseases (NCDs) among older people, as an  
25  
26 unhealthy weight is a major risk factor for NCDs (35-38). An exception to these findings could be  
27  
28 made of Nigeria where older age was associated negatively with underweight women. This implies  
29  
30 that in this setting, the older women become the more likelihood that they will suffer from  
31  
32 underweight. The consequential effect of this may be poor health outcomes, as being underweight  
33  
34 exposes women to higher risks of morbidity and mortality during pregnancy and child birth (39-  
35  
36 41). The relationship between age and DBM has been documented in previous studies. For  
37  
38 example, Doku and Neupane observed a significant positive association between age and the key  
39  
40 indicators of DBM in Ghana (33). A study in Bangladesh observed a significant positive relationship  
41  
42 between older age and DBM (42). These findings together with the findings from our study  
43  
44 confirmed the contribution of age to the DBM epidemic.  
45  
46  
47  
48  
49  
50  
51  
52  
53  
54  
55  
56  
57  
58  
59  
60



1  
2  
3 Our analysis showed that household wealth index had mixed effects on DBM. In general, the three  
4 rich quintiles: middle, richer and richest were associated significantly and positively with  
5 overweight and obesity among women across all the countries included in the analysis. This may  
6  
7  
8  
9  
10 be due to obesogenic effects of increased household wealth as dietary pattern changes (43), and  
11  
12  
13 the fact that there is a documented positive correlation between household wealth and unhealthy  
14  
15  
16 body weight (44, 45). In Bangladesh and Nepal, higher household wealth was associated with an  
17  
18  
19 increased likelihood of being overweight and obese (44). Also, being rich was associated with  
20  
21  
22 overweight and obesity among Ghanaian women (33). Interestingly, higher household wealth had  
23  
24  
25 an inverse effect on underweight. This inverse relationship may be due to the fact that most  
26  
27  
28 underweight women are likely to be in the poorer wealth quintiles (46) and therefore, may be  
29  
30  
31 unaffected by the higher household wealth quintiles. The inverse relationship has been observed  
32  
33  
34 previously (47). Relatedly, compared to the richest, women from the poorest households were  
35  
36  
37 significantly most likely to be underweight and least likely to be overweight over normal weight in  
38  
39  
40 Bangladesh (17). Suggesting that being in the poorest household is protective against overweight  
41  
42  
43 but not underweight (46).

43  
44 The health benefits of breastfeeding were illuminated in this study. Breastfeeding was found to  
45  
46  
47 associate with less likelihood of underweight, overweight and obesity in the five countries  
48  
49  
50 analysed. This suggests that mothers who have unhealthy weight should be encourage to practice  
51  
52  
53 breastfeeding as the benefits are not only to their offspring but also for their own health and  
54  
55  
56 wellbeing. These findings confirm the widely recognized benefits of breastfeeding for improved  
57  
58  
59 health and developmental outcomes in mothers and their infants (48-51). The implication of this  
60

1  
2  
3 may be that interventions to promote breastfeeding may have positive impact on the DBM  
4  
5 epidemic at the national level. The benefits of breastfeeding to women health have previously  
6  
7 been documented. For example, breastfeeding has been suggested as an efficient means of  
8  
9 promoting postpartum weight loss due to its high energy cost (52). Further evidence suggest that  
10  
11 at 12 weeks postpartum, exclusively breastfeeding (EBF) mothers had lost more total body weight  
12  
13 than mixed feeding mothers. However, mixed feeding mothers lost slightly more percent body fat  
14  
15 than exclusively breastfeeding mothers (52).The authors concluded that EBF promotes greater  
16  
17 weight loss than mixed feeding among mothers even in the early postpartum period. Several other  
18  
19 studies have shown that EBF influences postpartum weight loss (51-54). The preceding discussion  
20  
21 points to the need for health policy makers to design programmes to encourage mothers to  
22  
23 breastfeed, especially, practice exclusive breastfeeding as a means of DBM prevention.  
24  
25  
26  
27  
28  
29  
30  
31  
32

33  
34 An important strength of our study is the use of large nationally representative samples, thereby  
35  
36 providing more robust estimates of observed associations as well as enhancing the generalizability  
37  
38 of the findings. The use of multi-country data help unmask differences and commonalities in the  
39  
40 effects of the correlates on DBM across countries, which would not have been possible with single  
41  
42 country data. Additionally, the height and weight data which were used to compute the BMI were  
43  
44 objectively measured, reducing possible misclassification. A limitation worth mentioning is the  
45  
46 cross-sectional nature of the data, which does not lends itself to the establishments of causal  
47  
48 relationship between the predictor and outcome variables. The conclusions in the paper are  
49  
50 therefore interpreted as mere associations between the predictor variables and the outcome  
51  
52 variable. Another limitation is that due to data limitation, we were not able to examine DBM at the  
53  
54  
55  
56  
57  
58  
59  
60

1  
2  
3 individual and within households. The analysis and interpretation in this paper are therefore  
4  
5 limited to DBM at population or national level, whereby underweight, overweight and obesity co-  
6  
7 exist in the same country.  
8  
9

## 10 11 12 13 14 **Conclusions**

15  
16  
17 The study investigated the correlates of the DBM in five SSA countries. The analysis revealed that  
18  
19 the effects of the correlates on DBM are largely similar across countries, except in few cases where  
20  
21 there were disparities in the effects. The results indicate that higher number of years of education  
22  
23 increases the likelihood of overweight and obesity among women in Ghana, Mozambique and  
24  
25 Nigeria. Conversely, number of years of education is associated negatively with underweight in  
26  
27 Kenya and Nigeria. Living in better-off households increases significantly the likelihood of  
28  
29 overweight and obesity among women across all countries, while associated with the likelihood of  
30  
31 underweight. Interventions to address DBM should take into account socioeconomic status. This  
32  
33 may include providing special programmes for women who have unhealthy weight in wealthy  
34  
35 households. A unit change in age is also associated significantly and positively with underweight,  
36  
37 overweight and obesity in all the countries included in the analysis. Breastfeeding is associated  
38  
39 with least likelihood of underweight, overweight and obesity in breastfeeding mothers. This  
40  
41 implies that interventions to prevent DBM should incorporate breastfeeding to enhance their  
42  
43 effectiveness.  
44  
45  
46  
47  
48  
49  
50  
51  
52  
53  
54  
55  
56  
57  
58  
59  
60

## Acknowledgements

We wish to express our profound gratitude to The DHS Program, USA for providing us access to the data. We also wish to acknowledge institutions of respective countries that played critical roles in the data collection process.

## Competing Interest

The authors have no competing interests to declare.

## Funding

This study did not receive funding from any source.

## Data Sharing Statement

This study was a re-analysis of existing data that are publicly available from The DHS Program at <http://dhsprogram.com/publications/publication-fr221-dhs-final-reports.cfm>. Data are accessible free of charge upon a registration with the Demographic and Health Survey program (The DHS Program). The registration is done on the DHS website indicated above.

## Authors' Contribution

DAA conceived and designed the study. DAA and ZTD conducted the data analysis, interpreted the results and drafted the manuscript. CK contributed to study design, data analysis, interpretation, and critical revision of the manuscript. All authors take responsibility of any issues that might arise from the publication of this manuscript.

## References

1. World Health Organization. Double burden of malnutrition 2017 [cited 2018. Available from: <http://www.who.int/nutrition/double-burden-malnutrition/en/>.
2. Shrimpton R, Rokx C. The Double Burden of Malnutrition : A Review of Global Evidence. Health, Nutrition and Population Discussion Paper;. World Bank, Washington, DC. World Bank. <https://openknowledge.worldbank.org/handle/10986/27417> 2012.
3. NCD Risk Factor Collaboration. Trends in adult body-mass index in 200 countries from 1975 to 2014: a pooled analysis of 1698 population-based measurement studies with 19·2 million participants The Lancet. 2016;387(10026):1377-296.
4. Kolčić I. Double burden of malnutrition: A silent driver of double burden of disease in low- and middle-income countries. Journal of Global Health. 2012;2(2):020303.
5. World Health Organization. Global Status Report on Non-communicable diseases 2010. Geneva: WHO. 2011.
6. Amugsi DA, Dimbuene ZT, Mberu B, Muthuri S, Ezech AC. Prevalence and time trends in overweight and obesity among urban women: an analysis of demographic and health surveys data from 24 African countries, 1991–2014. BMJ Open. 2017;7(10):e017344.
7. Mendez MA, Monteiro CA, Popkin BM. Overweight Exceeds Underweight Among Women in Most Developing Countries American Journal of Clinical Nutrition. 2005;81:714-21.
8. Delisle H. Poverty. The Double Burden of Malnutrition in Mothers and the Intergenerational Impact. Ann NY Acad Sci 2008;1136:172-84.
9. WHO. World Health Report 2002. Reducing risks, promoting healthy life. Geneva. 2002.
10. World Health Organization. Global health risks: mortality and burden of disease attributable to selected major risks 2009 [Available from: [http://www.who.int/healthinfo/global\\_burden\\_disease/GlobalHealthRisks\\_report\\_full.pdf](http://www.who.int/healthinfo/global_burden_disease/GlobalHealthRisks_report_full.pdf).
11. Delisle H. Early nutritional influences on obesity, diabetes and cardiovascular disease risk. International Workshop, 6-9 June 2004, Montreal University, Quebec, Canada. Maternal and Child Nutrition. 2005;1(3):128-9.
12. World Health Organization. Urgent action needed to tackle the double burden of malnutrition and to achieve Universal Health Coverage and Sustainable Development Goals in Africa 2018 [Available from: <https://www.afro.who.int/news/urgent-action-needed-tackle-double-burden-malnutrition-and-achieve-universal-health-coverage>.
13. Kennedy G, Nantel G, Shetty P. Assessment of the double burden of malnutrition in six case study countries [Available from: <http://www.fao.org/docrep/009/a0442e/a0442e03.htm#TopOfPage>.
14. Hasan M, Sutradhar I, Shahabuddin A, Sarker M. Double Burden of Malnutrition among Bangladeshi Women: A Literature Review. Muacevic A, Adler JR, eds. . Cureus. 2017;9(12).
15. Sarma H, Saquib N, Hasan MM, Saquib J, Rahman AS, Khan JR, et al. Determinants of overweight or obesity among ever-married adult women in Bangladesh. BMC obesity. 2016;3:13.

- 1  
2  
3 16. Zeba AN, Delisle HF, Renier G, Savadogo B, Baya B. The double burden of malnutrition and  
4 cardiometabolic risk widens the gender and socio-economic health gap: a study among adults in Burkina  
5 Faso (West Africa). *Public health nutrition*. 2012;15(12):2210-9.
- 6 17. Kamal SM, Hassan CH, Alam GM. Dual burden of underweight and overweight among women in  
7 Bangladesh: patterns, prevalence, and sociodemographic correlates. *Journal of health, population, and  
8 nutrition*. 2015;33(1):92-105.
- 9 18. Kimani-Murage EW, Muthuri SK, Oti SO, Mutua MK, van de Vijver S, Kyobutungi C. Evidence of a  
10 Double Burden of Malnutrition in Urban Poor Settings in Nairobi, Kenya. *PloS one*. 2015;10(6):e0129943.
- 11 19. Neupane S, Prakash KC, Doku DT. Overweight and obesity among women: analysis of  
12 demographic and health survey data from 32 Sub-Saharan African Countries. *BMC public health*.  
13 2016;16:30.
- 14 20. The DHS Program. Demographic and Health Surveys [Available from:  
15 <http://dhsprogram.com/data/available-datasets.cfm>.
- 16 21. Amugsi DA, Dimbuene ZT, Kimani-Murage EW, Mberu B, Ezeh AC. Differential effects of dietary  
17 diversity and maternal characteristics on linear growth of children aged 6-59 months in sub-Saharan  
18 Africa: a multi-country analysis. *Public health nutrition*. 2017;20(6):1029-45.
- 19 22. The DHS Program. Demographic and Health Surveys [cited 2018 06.09]. Available from:  
20 [https://dhsprogram.com/data/dataset\\_admin/download-datasets.cfm](https://dhsprogram.com/data/dataset_admin/download-datasets.cfm) [  
21
- 22 23. The DHS Program. DHS Methodology [Available from: <http://dhsprogram.com/What-We-Do/Survey-Types/DHS-Methodology.cfm>].
- 23 24. Ghana Statistical Service (GSS), Ghana Health Service (GHS), ICF Macro. Ghana Demographic and  
24 Health Survey 2008 Accra, Ghana: GSS, GHS, and ICF Macro; 2009.
- 25 25. Ministry of Health and Social Services (MoHSS), Macro International Inc. Namibia Demographic  
26 and Health Survey 2006-07 Windhoek, Namibia and Calverton, Maryland, USA: MoHSS and Macro  
27 International Inc. ; 2008.
- 28 26. Ghana Statistical Service (GSS), Ghana Health Service (GHS), ICF International. Ghana  
29 Demographic and Health Survey 2014. Rockville, Maryland, USA: GSS, GHS, and ICF International.; 2015.
- 30 27. National Population Commission (NPC) [Nigeria], ICF International. Nigeria Demographic and  
31 Health Survey 2013. Abuja, Nigeria, and Rockville, Maryland, USA: NPC and ICF International. . 2014.
- 32 28. National Bureau of Statistics-Kenya, ICF International. 2014 KDHS Key Findings. Rockville,  
33 Maryland, USA: KNBS and ICF International. 2015.
- 34 29. Eknoyan G. Adolphe Quetelet (1796 –1874) - the average man and indices of obesity . *Nephrol  
35 Dial Transplant* 2008;23:47-51.
- 36 30. World Health Organization. BMI classification: WHO; 2006 [Available from:  
37 [http://apps.who.int/bmi/index.jsp?introPage=intro\\_3.html](http://apps.who.int/bmi/index.jsp?introPage=intro_3.html).
- 38 31. Starkweather J, Moske KA. Multinomial Logistic Regression. 2011 [Available from:  
39 [https://it.unt.edu/sites/default/files/mlr\\_jds\\_aug2011.pdf](https://it.unt.edu/sites/default/files/mlr_jds_aug2011.pdf).
- 40 32. Kautzky-Willer A, Dorner T, Jensby A, Rieder A. Women show a closer association between  
41 educational level and hypertension or diabetes mellitus than males: a secondary analysis from the  
42 Austrian HIS. *BMC Public Health*. 2012;12:392-.
- 43 33. Doku DT, Neupane S. Double burden of malnutrition: increasing overweight and obesity and stall  
44 underweight trends among Ghanaian women. *BMC Public Health*. 2015;15(1):670.
- 45 34. Hanandita W, Tampubolon G. The double burden of malnutrition in Indonesia: Social  
46 determinants and geographical variations. *SSM - Population Health*. 2015;1:16-25.
- 47 35. Kunutsor S, Powles J. Descriptive epidemiology of blood pressure in a rural adult population in  
48 Northern Ghana *Rural Remote Health*. 2009;9(2):1095.
- 49 36. Agyemang C. Rural and urban differences in blood pressure and hypertension in Ghana, West  
50 Africa *Public Health*. 2006;120(6):525-33.
- 51  
52  
53  
54  
55  
56  
57  
58  
59  
60

- 1
- 2
- 3 37. Van Middendorp D, Asbroek A, Bio FY, Edusei A, Meijjer L, Newton S, et al. Rural and urban
- 4 differences in blood pressure and pregnancy-induced hypertension among pregnant women in Ghana
- 5 *Globalization and Health* 2013;9, 59
- 6 38. Nichols SR, Elliott P. Hypertension. In: Murray CJL, Lopez AD, editors. *Quantifying Global Health*
- 7 *Risks: the Burden of Disease Attributable to Selected Risk Factors*. Cambridge, Massachusetts: Harvard
- 8 University Press; 1996.
- 9 39. Negoro H, Sugino Y, Nishizawa K, Soda T, Shimizu Y, Yoshimura K, et al. Underweight body mass
- 10 index is a risk factor of mortality in outpatients with nocturia in Japan. *BMC Research Notes*. 2015;8:490.
- 11 40. Park D, Lee J-H, Han S. Underweight: another risk factor for cardiovascular disease? A cross-
- 12 sectional 2013 Behavioral Risk Factor Surveillance System (BRFSS) study of 491,773 individuals in the USA.
- 13 *Medicine*. 2017;96(48):e8769.
- 14 41. Victora CG, Adair L, Fall C, Hallal PC, Martorell R, Richter L, et al. Maternal and child
- 15 undernutrition: consequences for adult health and human capital. *Lancet*. 2008;371(9609):340-57.
- 16 42. Oddo V, H Rah J, D Semba R, Sun K, Akhter N, Sari M, et al. Predictors of maternal and child
- 17 double burden of malnutrition in rural Indonesia and Bangladesh 2012. 951-8 p.
- 18 43. Aitsi-Selmi A, Bell R, Shipley MJ, Marmot MG. Education Modifies the Association of Wealth with
- 19 Obesity in Women in Middle-Income but Not Low-Income Countries: An Interaction Study Using Seven
- 20 National Datasets, 2005-2010. *PloS one*. 2014;9(3):e90403.
- 21 44. Bishwajit G. Household wealth status and overweight and obesity among adult women in
- 22 Bangladesh and Nepal. *Obesity science & practice*. 2017;3(2):185-92.
- 23 45. Balarajan Y, Villamor E. Nationally representative surveys show recent increases in the prevalence
- 24 of overweight and obesity among women of reproductive age in Bangladesh, Nepal, and India. *J Nutr*.
- 25 2009;139(11):2139-44.
- 26 46. Tebekaw Y, Teller C, Colon-Ramos U. The burden of underweight and overweight among women
- 27 in Addis Ababa, Ethiopia. *BMC Public Health*. 2014;14:1126.
- 28 47. Selvamani Y, Singh P. Socioeconomic patterns of underweight and its association with self-rated
- 29 health, cognition and quality of life among older adults in India. *PloS one*. 2018;13(3):e0193979.
- 30 48. Jonas W, Nissen E, Ransjö-Arvidson AB, Wiklund I, Henriksson P, Uvnäs-Moberg K. Short- and long-
- 31 term decrease of blood pressure in women during breastfeeding *Breastfeed Med* 2008;3(2):103-9.
- 32 49. Handlin L, Jonas W, Ransjö-Arvidson AB, Petersson M, Uvnäs-Moberg K, Nissen E. Influence of
- 33 common birth interventions on maternal blood pressure patterns during breastfeeding 2 days after birth
- 34 *Breastfeed Med* 2012;7(2):93-9.
- 35 50. Stuebe AM, Schwarz EB, Grewen K, Rich-Edwards JW, Michels KB, Foster EM, et al. Duration of
- 36 Lactation and Incidence of Maternal Hypertension: A Longitudinal Cohort Study. *American Journal of*
- 37 *Epidemiology*. 2011;174(10):1147-58.
- 38 51. Samano R, Martinez-Rojano H, Godinez Martinez E, Sanchez Jimenez B, Villeda Rodriguez GP,
- 39 Perez Zamora J, et al. Effects of breastfeeding on weight loss and recovery of pregestational weight in
- 40 adolescent and adult mothers. *Food Nutr Bull*. 2013;34(2):123-30.
- 41 52. Hatsu IE, McDougald DM, Anderson AK. Effect of infant feeding on maternal body composition.
- 42 *International breastfeeding journal*. 2008;3:18.
- 43 53. Lopez-Olmedo N, Hernandez-Cordero S, Neufeld LM, Garcia-Guerra A, Mejia-Rodriguez F, Mendez
- 44 Gomez-Humaran I. The Associations of Maternal Weight Change with Breastfeeding, Diet and Physical
- 45 Activity During the Postpartum Period. *Matern Child Health J*. 2016;20(2):270-80.
- 46 54. Schalla SC, Witcomb GL, Haycraft E. Body Shape and Weight Loss as Motivators for Breastfeeding
- 47 Initiation and Continuation. *International journal of environmental research and public health*. 2017;14(7).
- 48
- 49
- 50
- 51
- 52
- 53
- 54
- 55
- 56
- 57
- 58
- 59
- 60

1  
2  
3  
4  
5  
6  
7  
8  
9  
10  
11  
12  
13  
14  
15  
16  
17  
18  
19  
20  
21  
22  
23  
24  
25  
26  
27  
28  
29  
30  
31  
32  
33  
34  
35  
36  
37  
38  
39  
40  
41  
42  
43  
44  
45  
46  
47  
48  
49  
50  
51  
52  
53  
54  
55  
56  
57  
58  
59  
60

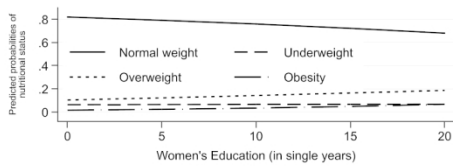

Source: 2013-2014 DHS D.R. Congo

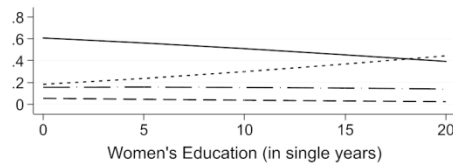

Source: 2014 DHS Ghana

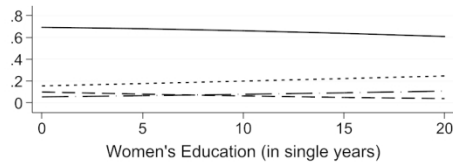

Source: 2013 DHS Nigeria

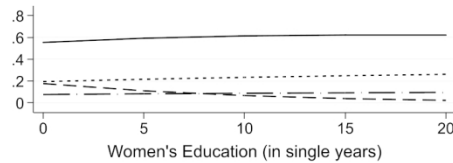

Source: 2014 DHS Kenya

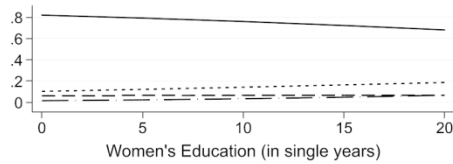

Source: 2011 DHS Mozambique

152x101mm (300 x 300 DPI)



1  
2  
3  
4  
5  
6  
7  
8  
9  
10  
11  
12  
13  
14  
15  
16  
17  
18  
19  
20  
21  
22  
23  
24  
25  
26  
27  
28  
29  
30  
31  
32  
33  
34  
35  
36  
37  
38  
39  
40  
41  
42  
43  
44  
45  
46  
47  
48  
49  
50  
51  
52  
53  
54  
55  
56  
57  
58  
59  
60

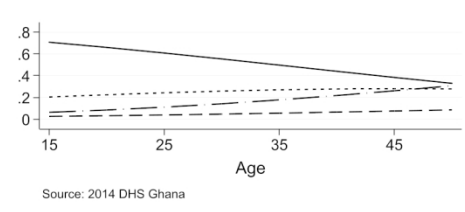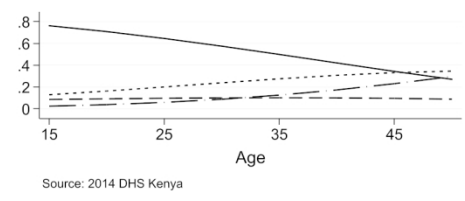

152x101mm (300 x 300 DPI)

**STROBE 2007 (v4) Statement—Checklist of items that should be included in reports of *cross-sectional studies***

| Section/Topic                | Item # | Recommendation                                                                                                                                                                       | Reported on page # |
|------------------------------|--------|--------------------------------------------------------------------------------------------------------------------------------------------------------------------------------------|--------------------|
| <b>Title and abstract</b>    | 1      | (a) Indicate the study's design with a commonly used term in the title or the abstract                                                                                               | 1                  |
|                              |        | (b) Provide in the abstract an informative and balanced summary of what was done and what was found                                                                                  | 2                  |
| <b>Introduction</b>          |        |                                                                                                                                                                                      |                    |
| Background/rationale         | 2      | Explain the scientific background and rationale for the investigation being reported                                                                                                 | 4-6-               |
| Objectives                   | 3      | State specific objectives, including any prespecified hypotheses                                                                                                                     | 7                  |
| <b>Methods</b>               |        |                                                                                                                                                                                      |                    |
| Study design                 | 4      | Present key elements of study design early in the paper                                                                                                                              | 7-8                |
| Setting                      | 5      | Describe the setting, locations, and relevant dates, including periods of recruitment, exposure, follow-up, and data collection                                                      | 7-9                |
| Participants                 | 6      | (a) Give the eligibility criteria, and the sources and methods of selection of participants                                                                                          | 8                  |
| Variables                    | 7      | Clearly define all outcomes, exposures, predictors, potential confounders, and effect modifiers. Give diagnostic criteria, if applicable                                             | 8-9                |
| Data sources/<br>measurement | 8*     | For each variable of interest, give sources of data and details of methods of assessment (measurement). Describe comparability of assessment methods if there is more than one group | 8-9                |
| Bias                         | 9      | Describe any efforts to address potential sources of bias                                                                                                                            |                    |
| Study size                   | 10     | Explain how the study size was arrived at                                                                                                                                            |                    |
| Quantitative variables       | 11     | Explain how quantitative variables were handled in the analyses. If applicable, describe which groupings were chosen and why                                                         | 9-10               |
| Statistical methods          | 12     | (a) Describe all statistical methods, including those used to control for confounding                                                                                                | 9-10               |
|                              |        | (b) Describe any methods used to examine subgroups and interactions                                                                                                                  | 9-10               |
|                              |        | (c) Explain how missing data were addressed                                                                                                                                          | 9-10               |
|                              |        | (d) If applicable, describe analytical methods taking account of sampling strategy                                                                                                   |                    |
|                              |        | (e) Describe any sensitivity analyses                                                                                                                                                | NA                 |
| <b>Results</b>               |        |                                                                                                                                                                                      |                    |

|                          |     |                                                                                                                                                                                                              |       |
|--------------------------|-----|--------------------------------------------------------------------------------------------------------------------------------------------------------------------------------------------------------------|-------|
| Participants             | 13* | (a) Report numbers of individuals at each stage of study—eg numbers potentially eligible, examined for eligibility, confirmed eligible, included in the study, completing follow-up, and analysed            | 8     |
|                          |     | (b) Give reasons for non-participation at each stage                                                                                                                                                         | 8     |
|                          |     | (c) Consider use of a flow diagram                                                                                                                                                                           | NA    |
| Descriptive data         | 14* | (a) Give characteristics of study participants (eg demographic, clinical, social) and information on exposures and potential confounders                                                                     | 11-12 |
|                          |     | (b) Indicate number of participants with missing data for each variable of interest                                                                                                                          | NA    |
| Outcome data             | 15* | Report numbers of outcome events or summary measures                                                                                                                                                         | NA    |
| Main results             | 16  | (a) Give unadjusted estimates and, if applicable, confounder-adjusted estimates and their precision (eg, 95% confidence interval). Make clear which confounders were adjusted for and why they were included | 9-10  |
|                          |     | (b) Report category boundaries when continuous variables were categorized                                                                                                                                    | 10    |
|                          |     | (c) If relevant, consider translating estimates of relative risk into absolute risk for a meaningful time period                                                                                             | NA    |
| Other analyses           | 17  | Report other analyses done—eg analyses of subgroups and interactions, and sensitivity analyses                                                                                                               | NA    |
| <b>Discussion</b>        |     |                                                                                                                                                                                                              |       |
| Key results              | 18  | Summarise key results with reference to study objectives                                                                                                                                                     | 21    |
| Limitations              | 19  | Discuss limitations of the study, taking into account sources of potential bias or imprecision. Discuss both direction and magnitude of any potential bias                                                   | 24    |
| Interpretation           | 20  | Give a cautious overall interpretation of results considering objectives, limitations, multiplicity of analyses, results from similar studies, and other relevant evidence                                   | 21-24 |
| Generalisability         | 21  | Discuss the generalisability (external validity) of the study results                                                                                                                                        | 25    |
| <b>Other information</b> |     |                                                                                                                                                                                                              |       |
| Funding                  | 22  | Give the source of funding and the role of the funders for the present study and, if applicable, for the original study on which the present article is based                                                | NA    |

\*Give information separately for cases and controls in case-control studies and, if applicable, for exposed and unexposed groups in cohort and cross-sectional studies.

**Note:** An Explanation and Elaboration article discusses each checklist item and gives methodological background and published examples of transparent reporting. The STROBE checklist is best used in conjunction with this article (freely available on the Web sites of PLoS Medicine at <http://www.plosmedicine.org/>, Annals of Internal Medicine at <http://www.annals.org/>, and Epidemiology at <http://www.epidem.com/>). Information on the STROBE Initiative is available at [www.strobe-statement.org](http://www.strobe-statement.org).
